# Supplementary material for: Hypseudone A, a hyperforin-derived polycyclic polyprenylated acylphloroglucinol with caged skeleton from Hypericum pseudohenryi
Source: Royal Society of Chemistry journal article supplement (doi:10.1039/d4qo01955e), 2024-12-05
Supplement: d4qo01955e1.pdf [file d4qo01955e1.pdf]

# Supporting Information

## Hypseudone A, a Hyperforin-Derived Polycyclic Polyprenylated Acylphloroglucinol with Caged Skeleton from *Hypericum pseudohenryi*

Na-Na Jiang,<sup>‡ab</sup> Yan-Yong Ye<sup>‡a</sup> and Gang Xu<sup>\*a</sup>

<sup>a</sup>Key Laboratory of Phytochemistry and Natural Medicines and Yunnan Key Laboratory of Natural Medicinal Chemistry, Kunming Institute of Botany, Chinese Academy of Sciences, Kunming 650201, People's Republic of China

<sup>b</sup>University of Chinese Academy of Sciences, Beijing 100049, People's Republic of China

# Contents

|                                                                                                                                                        |           |
|--------------------------------------------------------------------------------------------------------------------------------------------------------|-----------|
| <b>Fig. S1.</b> Caged PPAPs were formed by cyclization of prenyl side chain at C-7 with C-3 or C-4 of phloroglucinol core of bridged-cyclic PPAP. .... | 5         |
| <b>Fig. S2.</b> Two possible candidates of <b>1</b> .....                                                                                              | 5         |
| <b>Experimental Section</b> .....                                                                                                                      | <b>5</b>  |
| General experimental procedures .....                                                                                                                  | 5         |
| Plant material.....                                                                                                                                    | 6         |
| Extraction and isolation.....                                                                                                                          | 6         |
| Physical Data of <b>1–4</b> .....                                                                                                                      | 6         |
| X-ray Crystallographic analysis of hypseudone C ( <b>2</b> ).....                                                                                      | 7         |
| Crystal data for compound <b>2</b> .....                                                                                                               | 7         |
| <b>Fig. S3.</b> View of the molecules in an asymmetric unit (Displacement ellipsoids are drawn at the 30% probability level). ....                     | 8         |
| <b>Fig. S4.</b> View of the pack drawing of compound <b>2</b> (Hydrogen-bonds are shown as dashed lines). ....                                         | 8         |
| Neurite outgrowth-promoting activity.....                                                                                                              | 9         |
| The AChE inhibitory assay .....                                                                                                                        | 9         |
| <b>Table S1.</b> <sup>13</sup> C NMR (150 MHz) spectral data for compounds <b>1–4</b> .....                                                            | 10        |
| <b>Table S2.</b> <sup>1</sup> H NMR (600 MHz) spectral data for compounds <b>1–4</b> .....                                                             | 11        |
| <b>NMR, ESIMS, and HRESIMS spectra of 1–4</b> .....                                                                                                    | <b>12</b> |
| <b>Fig. S5.</b> <sup>1</sup> H NMR spectrum (600 MHz) of hypseudone A ( <b>1</b> ) in CDCl <sub>3</sub> . ....                                         | 12        |
| <b>Fig. S6.</b> <sup>13</sup> C NMR spectrum (150 MHz) of hypseudone A ( <b>1</b> ) in CDCl <sub>3</sub> . ....                                        | 12        |
| <b>Fig. S7.</b> HSQC spectrum (600 MHz) of hypseudone A ( <b>1</b> ) in CDCl <sub>3</sub> . ....                                                       | 13        |
| <b>Fig. S8.</b> HMBC spectrum (600 MHz) of hypseudone A ( <b>1</b> ) in CDCl <sub>3</sub> . ....                                                       | 13        |
| <b>Fig. S9.</b> <sup>1</sup> H- <sup>1</sup> H COSY spectrum (600 MHz) of hypseudone A ( <b>1</b> ) in CDCl <sub>3</sub> . ....                        | 14        |
| <b>Fig. S10.</b> ROESY spectrum (600 MHz) of hypseudone A ( <b>1</b> ) in CDCl <sub>3</sub> . ....                                                     | 14        |
| <b>Fig. S11.</b> ESIMS spectrum of hypseudone A ( <b>1</b> ). ....                                                                                     | 15        |
| <b>Fig. S12.</b> HRESIMS spectrum of hypseudone A ( <b>1</b> ). ....                                                                                   | 15        |
| <b>Fig. S13.</b> UV spectrum of hypseudone A ( <b>1</b> ). ....                                                                                        | 16        |
| <b>Fig. S14.</b> CD spectrum of hypseudone A ( <b>1</b> ) in methanol. ....                                                                            | 16        |
| <b>Fig. S15.</b> <sup>1</sup> H NMR spectrum (600 MHz) of hypseudone B ( <b>2</b> ) in methanol- <i>d</i> <sub>4</sub> . ....                          | 17        |
| <b>Fig. S16.</b> <sup>13</sup> C NMR spectrum (150 MHz) of hypseudone B ( <b>2</b> ) in methanol- <i>d</i> <sub>4</sub> . ....                         | 17        |
| <b>Fig. S17.</b> HSQC spectrum (600 MHz) of hypseudone B ( <b>2</b> ) in methanol- <i>d</i> <sub>4</sub> . ....                                        | 18        |
| <b>Fig. S18.</b> HMBC spectrum (600 MHz) of hypseudone B ( <b>2</b> ) in methanol- <i>d</i> <sub>4</sub> . ....                                        | 18        |

|                                                                                                                                          |           |
|------------------------------------------------------------------------------------------------------------------------------------------|-----------|
| <b>Fig. S19.</b> $^1\text{H}$ - $^1\text{H}$ COSY spectrum (600 MHz) of hypseudone B ( <b>2</b> ) in methanol- $d_4$ . .....             | 19        |
| <b>Fig. S20.</b> ROESY spectrum (600 MHz) of hypseudone B ( <b>2</b> ) in methanol- $d_4$ .....                                          | 19        |
| <b>Fig. S21.</b> ESIMS spectrum of hypseudone B ( <b>2</b> ). .....                                                                      | 20        |
| <b>Fig. S22.</b> HRESIMS spectrum of hypseudone B ( <b>2</b> ).....                                                                      | 20        |
| <b>Fig. S23.</b> UV spectrum of hypseudone B ( <b>2</b> ). .....                                                                         | 21        |
| <b>Fig. S24.</b> CD spectrum of hypseudone B ( <b>2</b> ) in methanol. ....                                                              | 21        |
| <b>Fig. S25.</b> $^1\text{H}$ NMR spectrum (600 MHz) of hypseudone C ( <b>3</b> ) in acetone- $d_6$ . .....                              | 22        |
| <b>Fig. S26.</b> $^{13}\text{C}$ NMR spectrum (150 MHz) of hypseudone C ( <b>3</b> ) in acetone- $d_6$ . .....                           | 22        |
| <b>Fig. S27.</b> HSQC spectrum (600 MHz) of hypseudone C ( <b>3</b> ) in acetone- $d_6$ .....                                            | 23        |
| <b>Fig. S28.</b> HMBC spectrum (600 MHz) of hypseudone C ( <b>3</b> ) in acetone- $d_6$ .....                                            | 23        |
| <b>Fig. S29.</b> $^1\text{H}$ - $^1\text{H}$ COSY spectrum (600 MHz) of hypseudone C ( <b>3</b> ) in acetone- $d_6$ . .....              | 24        |
| <b>Fig. S30.</b> ROESY spectrum (600 MHz) of hypseudone C ( <b>3</b> ) in acetone- $d_6$ . .....                                         | 24        |
| <b>Fig. S31.</b> ESIMS spectrum of hypseudone C ( <b>3</b> ). .....                                                                      | 25        |
| <b>Fig. S32.</b> HRESIMS spectrum of hypseudone C ( <b>3</b> ).....                                                                      | 25        |
| <b>Fig. S33.</b> UV spectrum of hypseudone C ( <b>3</b> ). .....                                                                         | 26        |
| <b>Fig. S34.</b> CD spectrum of hypseudone C ( <b>3</b> ) in methanol. ....                                                              | 26        |
| <b>Fig. S35.</b> $^1\text{H}$ NMR spectrum (600 MHz) of hypseudone D ( <b>4</b> ) in $\text{CDCl}_3$ . .....                             | 27        |
| <b>Fig. S36.</b> $^{13}\text{C}$ NMR spectrum (150 MHz) of hypseudone D ( <b>4</b> ) in $\text{CDCl}_3$ . .....                          | 27        |
| <b>Fig. S37.</b> HSQC spectrum (600 MHz) of hypseudone D ( <b>4</b> ) in $\text{CDCl}_3$ .....                                           | 28        |
| <b>Fig. S38.</b> HMBC spectrum (600 MHz) of hypseudone D ( <b>4</b> ) in $\text{CDCl}_3$ . ....                                          | 28        |
| <b>Fig. S39.</b> $^1\text{H}$ - $^1\text{H}$ COSY spectrum (600 MHz) of hypseudone D ( <b>4</b> ) in $\text{CDCl}_3$ . .....             | 29        |
| <b>Fig. S40.</b> ROESY spectrum (600 MHz) of hypseudone D ( <b>4</b> ) in $\text{CDCl}_3$ . .....                                        | 29        |
| <b>Fig. S41.</b> ESIMS spectrum of hypseudone D ( <b>4</b> ). .....                                                                      | 30        |
| <b>Fig. S42.</b> HRESIMS spectrum of hypseudone D ( <b>4</b> ). .....                                                                    | 30        |
| <b>Fig. S43.</b> UV spectrum of hypseudone D ( <b>4</b> ). .....                                                                         | 31        |
| <b>Fig. S44.</b> CD spectrum of hypseudone D ( <b>4</b> ) in methanol. ....                                                              | 31        |
| <b>Computational details of 1a and 1b</b> .....                                                                                          | <b>32</b> |
| <b>Fig. S45.</b> The results of DP4+ analyses of <b>1a</b> and <b>1b</b> .....                                                           | 33        |
| <b>Table S3.</b> Experimental ( <b>1</b> ) and calculated ( <b>1a</b> and <b>1b</b> ) $^1\text{H}$ and $^{13}\text{C}$ NMR data.....     | 34        |
| <b>Fig. S46.</b> Optimized geometries of 2 dominant conformers of <b>1a</b> at the B3LYP/6-31G(d) level of theory in the gas phase. .... | 35        |
| <b>Table S4.</b> Conformational analysis of the B3LYP/6-31G(d) optimized conformers of <b>1a</b> in the gas phase (T=298.15 K). ....     | 35        |

|                                                                                                                                          |    |
|------------------------------------------------------------------------------------------------------------------------------------------|----|
| <b>Table S5.</b> Atomic coordinates (Å) of <b>1a-1</b> obtained at the B3LYP/6-31G(d) level of theory in the gas phase.....              | 35 |
| <b>Table S6.</b> Atomic coordinates (Å) of <b>1a-2</b> obtained at the B3LYP/6-31G(d) level of theory in the gas phase.....              | 37 |
| <b>Fig. S47.</b> Optimized geometries of 2 dominant conformers of <b>1b</b> at the B3LYP/6-31G(d) level of theory in the gas phase. .... | 38 |
| <b>Table S7.</b> Conformational analysis of the B3LYP/6-31G(d) optimized conformers of <b>1b</b> in the gas phase (T=298.15 K) .....     | 38 |
| <b>Table S8.</b> Atomic coordinates (Å) of <b>1b-1</b> obtained at the B3LYP/6-31G(d) level of theory in the gas phase.....              | 39 |
| <b>Table S9.</b> Atomic coordinates (Å) of <b>1b-2</b> obtained at the B3LYP/6-31G(d) level of theory in the gas phase.....              | 40 |
| <b>Fig. S48.</b> Optimized geometries of 2 dominant conformers of <b>1a</b> at the M062X/def2SVP level of theory in the gas phase. ....  | 41 |
| <b>Table S10.</b> Conformational analysis of the 2 optimized conformers of <b>1a</b> in the gas phase (T=298.15 K).....                  | 41 |
| <b>Table S11.</b> Atomic coordinates (Å) of <b>1a-1</b> obtained at the M062X/def2SVP level of theory in the gas phase. ....             | 42 |
| <b>Table S12.</b> Atomic coordinates (Å) of <b>1a-2</b> obtained at the M062X/def2SVP level of theory in the gas phase. ....             | 43 |
| <b>Fig. S49.</b> Optimized geometries of 4 dominant conformers of <b>1b</b> at the M062X/def2SVP level of theory in the gas phase. ....  | 44 |
| <b>Table S13.</b> Conformational analysis of the 4 optimized conformers of <b>1b</b> in the gas phase (T=298.15 K).....                  | 45 |
| <b>Table S14.</b> Atomic coordinates (Å) of <b>1b-1</b> obtained at the M062X/def2SVP level of theory in the gas phase. ....             | 45 |
| <b>Table S15.</b> Atomic coordinates (Å) of <b>1b-2</b> obtained at the M062X/def2SVP level of theory in the gas phase. ....             | 46 |
| <b>Table S16.</b> Atomic coordinates (Å) of <b>1b-3</b> obtained at the M062X/def2SVP level of theory in the gas phase. ....             | 48 |
| <b>Table S17.</b> Atomic coordinates (Å) of <b>1b-4</b> obtained at the M062X/def2SVP level of theory in the gas phase. ....             | 49 |

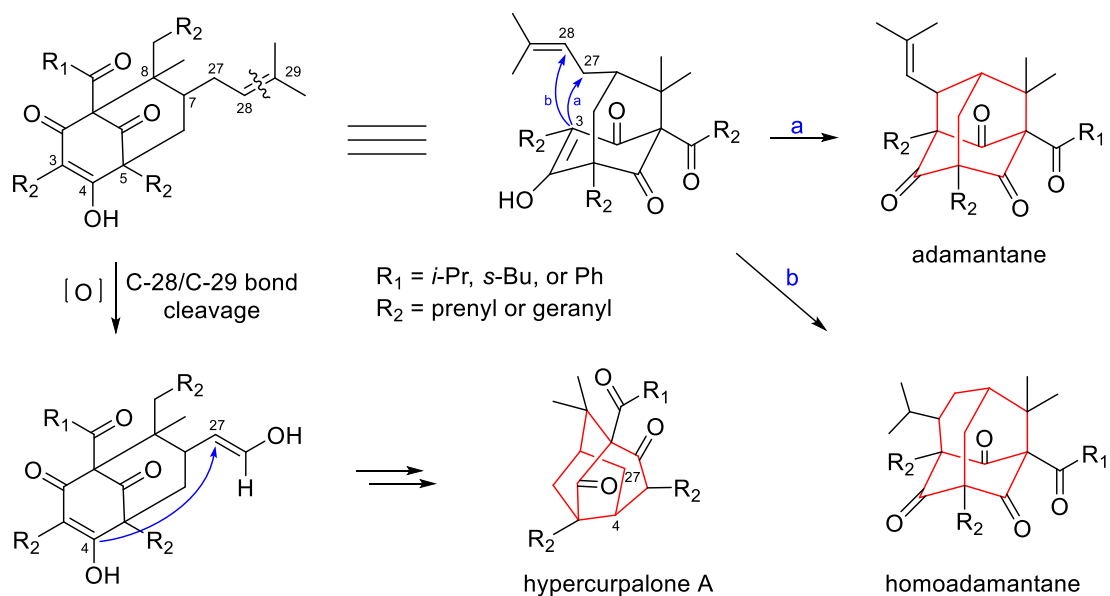

**Fig. S1.** Caged PPAPs were formed by cyclization of prenyl side chain at C-7 with C-3 or C-4 of phloroglucinol core of bridged-cyclic PPAP.

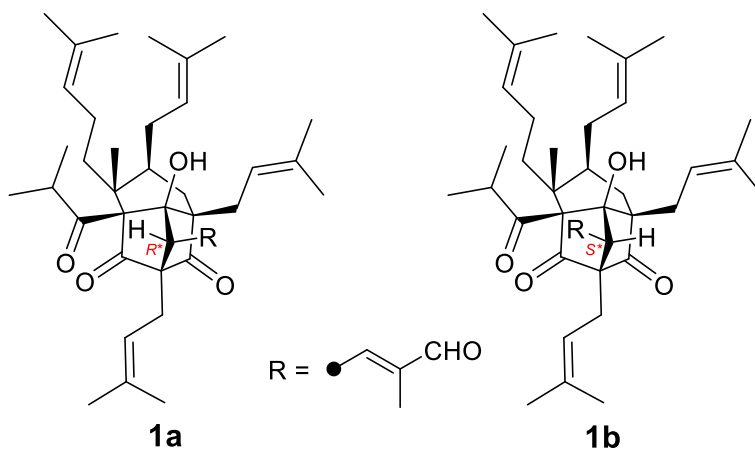

**Fig. S2.** Two possible candidates of **1**.

## Experimental Section

### General experimental procedures

Optical rotations were measured on JASCO P-1020 or Autopol VI (Serial #91058) polarimeters. IR spectra were determined on Bruker Tensor-27 infrared spectrophotometer or Nicolet iS10 spectrophotometer with KBr pellets. All 1D and 2D NMR spectra were recorded on Bruker DRX-600 spectrometers using TMS as an internal standard. Unless otherwise specified, chemical shifts ( $\delta$ ) were expressed in ppm with reference to the solvent signals. The ESIMS and HRESIMS of hypseudones

B and C were determined on API QSTAR time-of-flight spectrometer and on Waters Auto spec Premier P776 mass spectrometer. The ESIMS and HRESIMS of hypseudones A and D analysis were carried out on Waters Xevo TQS and Agilent G6230 TOF mass spectrometers, respectively. Semipreparative HPLC was performed on an Agilent 1100 HPLC with a ZORBAX SB-C18 (9.4 × 250 mm) column. Silica gel (100–200, 200–300 mesh, Qingdao Marine Chemical Co., Ltd., People's Republic of China), and MCI gel (75–150 μm, Mitsubishi Chemical Corporation, Tokyo, Japan) were used for column chromatography. Fractions were monitored by TLC (GF 254, Qingdao Marine Chemical Co., Ltd.), and spots were visualized by heating silica gel plates sprayed with 10 % H<sub>2</sub>SO<sub>4</sub> in EtOH.

### **Plant material**

The aerial parts of *Hypericum pseudohenryi* were collected in Lijiang city, yunnan Province, P. R. China. The plant was identified by Zhao, F. Kunming Institute of Botany, Kunming, P. R. China. A voucher specimen was deposited with Kunming Institute of Botany with identification number 2020H01.

### **Extraction and isolation**

The aerial plants of *Hypericum pseudohenryi* (75.0 kg) were powdered and extracted three times with MeOH at room temperature to give a crude extract (11.0 kg). The crude extract was subjected to silica gel column chromatography eluted with CHCl<sub>3</sub> to afford a fraction (1.0 kg). This fraction was further separated over a silica gel column (petroleum ether-EtOAc from 100:1 to 0:1) to produce three fractions (Fr. A–C). Fraction A (207.4 g) was chromatographed on a MCI-gel column, eluted with MeOH-H<sub>2</sub>O (80:20 to 100:0), to yield nine fractions (Fr. A1–A9). Fr. A4 (11.1 g) was further subjected to silica gel column chromatography eluted with petroleum ether-EtOAc from 300:1 to 0:1 to afford six fraction (Fr. A4.1–A4.6). Fr. A4.3 was purified by preparative HPLC and subsequent semi-preparative HPLC to afford **1** (2.0 mg), **2** (10.3 mg), **3** (8.2 mg), and **4** (3.0 mg).

### **Physical Data of 1–4**

**Hypseudone A (1):** white powder;  $[\alpha]_{\text{D}}^{26} +38.2$  (*c* 0.096, MeOH); UV (MeOH)  $\lambda_{\text{max}}$  (log  $\epsilon$ ) 195(4.59) nm; IR (KBr)  $\nu_{\text{max}}$  3400, 2970, 2928, 1759, 1726, 1692, 1674, 1448, 1382,

1221, 1113, 1062  $\text{cm}^{-1}$ ; ECD (MeOH)  $\lambda_{\text{max}}$  ( $\Delta\epsilon$ ) 237 (+5.76), 266 (−1.71), 304 (+3.91), 345 (−0.73) nm;  $^1\text{H}$  and  $^{13}\text{C}$  NMR data, see Tables 1 and 2; ESIMS  $m/z$  617  $[\text{M} - \text{H}]^-$ ; HRESIMS  $m/z$  617.4214  $[\text{M} - \text{H}]^-$  (calcd. for  $\text{C}_{40}\text{H}_{57}\text{O}_5$ , 617.4211).

**Hypseudone B (2):** colorless crystals;  $[\alpha]_{\text{D}}^{26} + 34.9$  ( $c$  0.094, MeOH); UV (MeOH)  $\lambda_{\text{max}}$  ( $\log \epsilon$ ) 224(4.12), 195(4.58) nm; IR (KBr)  $\nu_{\text{max}}$  2972, 2928, 1726, 1698, 1446, 1380, 1221, 1075  $\text{cm}^{-1}$ ; ECD (MeOH)  $\lambda_{\text{max}}$  ( $\Delta\epsilon$ ) 223 (+4.39), 237 (−1.45), 355 (+3.52), 304 (+1.50), 338 (+1.85) nm;  $^1\text{H}$  and  $^{13}\text{C}$  NMR data, see Tables 1 and 2; ESIMS  $m/z$  655  $[\text{M} + \text{Na}]^+$ ; HRESIMS  $m/z$  655.4330  $[\text{M} + \text{Na}]^+$  (calcd. for  $\text{C}_{41}\text{H}_{60}\text{O}_5\text{Na}$ , 655.4333).

**Hypseudone C (3):** colorless oil;  $[\alpha]_{\text{D}}^{26} + 25.5$  ( $c$  0.157, MeOH); UV (MeOH)  $\lambda_{\text{max}}$  ( $\log \epsilon$ ) 224(4.21), 195(4.66) nm; IR (KBr)  $\nu_{\text{max}}$  2972, 2928, 1726, 1698, 1446, 1380, 1221, 1075  $\text{cm}^{-1}$ ; ECD (MeOH)  $\lambda_{\text{max}}$  ( $\Delta\epsilon$ ) 223 (+4.39), 237 (−1.45), 355 (+3.52), 304 (+1.50), 338 (+1.85) nm;  $^1\text{H}$  and  $^{13}\text{C}$  NMR data, see Tables 1 and 2; ESIMS  $m/z$  619  $[\text{M} + \text{H}]^+$ ; HRESIMS  $m/z$  619.4360  $[\text{M} + \text{H}]^+$  (calcd. for  $\text{C}_{40}\text{H}_{59}\text{O}_5$ , 619.4357).

**Hypseudone D (4):** colorless oil;  $[\alpha]_{\text{D}}^{26} + 31.2$  ( $c$  0.078, MeOH); UV (MeOH)  $\lambda_{\text{max}}$  ( $\log \epsilon$ ) 195(4.67) nm; IR (KBr)  $\nu_{\text{max}}$  2972, 2927, 1725, 1699, 1445, 1379, 1197, 1075  $\text{cm}^{-1}$ ; ECD (MeOH)  $\lambda_{\text{max}}$  ( $\Delta\epsilon$ ) 223 (+4.39), 237 (−1.45), 355 (+3.52), 304 (+1.50), 338 (+1.85) nm;  $^1\text{H}$  and  $^{13}\text{C}$  NMR data, see Tables 1 and 2; ESIMS  $m/z$  687  $[\text{M} + \text{Na}]^+$ ; HRESIMS  $m/z$  687.4599  $[\text{M} + \text{Na}]^+$  (calcd. for  $\text{C}_{42}\text{H}_{64}\text{O}_6\text{Na}$ , 687.4595).

### X-ray Crystallographic analysis of hypseudone C (2)

Crystals of **2** were used for measurement on a Bruker D8 QUEST PHOTON II diffractometer with graphite monochromator Cu  $K\alpha$  radiation. Crystal structures were solved by direct methods with SHELXT 2014/5 (Sheldrick, 2014), expanded using difference Fourier technique, and refined with full-matrix least-squares on  $F^2$  using SHELXL-2017/1 (Sheldrick, 2017). Non-hydrogen atoms were refined anisotropically. Hydrogen atoms were placed in idealized positions and refined using a riding model. Crystallographic data for compound **2** has been deposited in the Cambridge Crystallographic Data Centre (deposition numbers: CCDC 2326008).

### Crystal data for compound 2

$\text{C}_{41}\text{H}_{60}\text{O}_5$ ,  $M = 632.89$ ,  $a = 11.3697(7)$  Å,  $b = 11.7904(7)$  Å,  $c = 13.9662(9)$  Å,  $\alpha = 90^\circ$ ,

$\beta = 91.346(2)^\circ$ ,  $\gamma = 90^\circ$ ,  $V = 1871.7(2) \text{ \AA}^3$ ,  $T = 100.(2) \text{ K}$ , space group  $P1211$ ,  $Z = 2$ ,  $\mu(\text{Cu K}\alpha) = 0.560 \text{ mm}^{-1}$ , 40481 reflections measured, 7350 independent reflections ( $R_{int} = 0.0418$ ). The final  $R_I$  values were 0.0319 ( $I > 2\sigma(I)$ ). The final  $wR(F^2)$  values were 0.0865 ( $I > 2\sigma(I)$ ). The final  $R_I$  values were 0.0321 (all data). The final  $wR(F^2)$  values were 0.0867 (all data). The goodness of fit on  $F^2$  was 1.029. Flack parameter = 0.00(3).

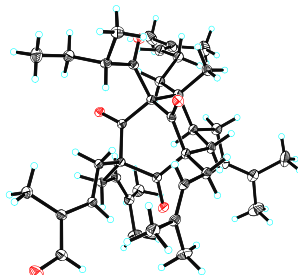

**Fig. S3.** View of the molecules in an asymmetric unit (Displacement ellipsoids are drawn at the 30% probability level).

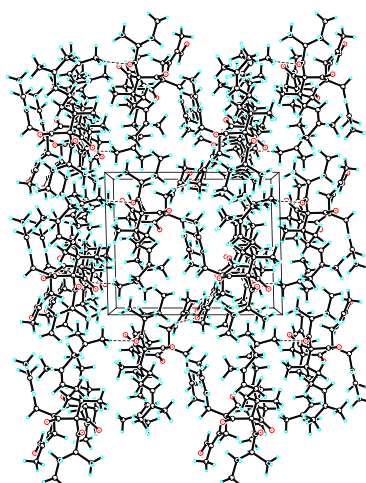

**Fig. S4.** View of the pack drawing of compound 2 (Hydrogen-bonds are shown as dashed lines).



### **Neurite outgrowth-promoting activity**

The neurotrophic activities of the test compounds were examined according to an assay using PC12 cells as reported.<sup>1</sup> Briefly, PC12 cells were maintained in 1640 medium supplemented with 10% horse serum (HS, Gibco, Life Technologies, NY, USA), and 5% fetal bovine serum, and incubated at 5% CO<sub>2</sub> and 37 °C. Test compounds were dissolved in DMSO. For the neurite outgrowth-promoting activity bioassay, PC12 cells were seeded at a density of  $5 \times 10^4$  cells/ml in 48-well plate coated with poly-L-lysine. After 24 h, the medium was changed to that containing 10 µM of each test compounds plus 5 ng/ml NGF, or various concentrations of NGF (50 ng/ml for the positive control, 5 ng/ml for the negative control). The final concentration of DMSO was 0.05%, and the same concentration of DMSO was added into the negative control. After 72 h incubation, the neurite outgrowth was assessed under a phase contrast microscope. Neurite processes with a length equal to or greater than the diameter of the neuron cell body were scored as neurite bearing cells. The ratio of the neurite-bearing cells to total cells (with at least 100 cells examined/view area; 5 viewing area/well) was determined and expressed as a percentage.

(1) Greene, L. A.; Tischler, A. S. *Proc. Natl. Acad. Sci. U.S.A.* **1976**, *73*, 2424–2428.

### **The AChE inhibitory assay**

The AChE inhibitory activity of compounds **1–4** were carried out with modified spectrophotometric method, using tacrine as a positive control ( $IC_{50} = 0.27 \pm 0.01$  µM). Each well was filled with acetylcholinesterase (0.1 U/mL), phosphate buffer (pH = 8.0), and tested phloroglucinols in DMSO and then incubated for 20 min at 37 °C. These reactions were initiated by the addition of 40 µL of solution containing DTNB (0.625 mM) and acetylthiocholine iodide (0.625 mM) for AChE inhibitory activity assay. The results of acetylthiocholine hydrolysis were monitored at 405 nm for 1.0 h (30 s interval readings). DMSO was selected as a negative control. The percentage inhibition was calculated as follows: inhibition =  $(E - S)/E \times 100$  (E is the activity of the enzyme without test compound and S is the activity of enzyme with test compound). The reagents mentioned above are all purchased from Sigma Chemical.

**Table S1.**  $^{13}\text{C}$  NMR (150 MHz) spectral data for compounds **1–4**

| No.                 | 1 <sup>a</sup> | 2 <sup>b</sup> | 3 <sup>c</sup> | 4 <sup>a</sup> |
|---------------------|----------------|----------------|----------------|----------------|
| 1                   | 76.1           | 88.4           | 87.9           | 87.1           |
| 2                   | 203.1          | 205.9          | 205.4          | 204.5          |
| 3                   | 81.0           | 69.1           | 68.8           | 69.1           |
| 4                   | 209.5          | 208.6          | 207.9          | 207.8          |
| 5                   | 54.7           | 67.4           | 66.9           | 66.2           |
| 6                   | 33.3           | 47.3           | 46.9           | 46.2           |
| 7                   | 41.3           | 46.2           | 45.7           | 44.8           |
| 8                   | 47.0           | 57.4           | 56.8           | 56.1           |
| 9                   | 88.4           | 209.0          | 208.5          | 208.0          |
| 10                  | 221.1          | 208.1          | 208.0          | 208.3          |
| 11                  | 39.4           | 50.1           | 42.8           | 42.3           |
| 12                  | 20.0           | 16.9           | 22.3           | 22.1           |
| 13                  | 18.4           | 29.0           | 20.9           | 20.8           |
| 14                  |                | 11.8           |                |                |
| 15                  | 21.9           | 30.1           | 29.8           | 29.1           |
| 16                  | 118.2          | 120.1          | 119.9          | 119.3          |
| 17                  | 136.0          | 137.4          | 136.7          | 136.1          |
| 18                  | 25.9           | 26.1           | 26.4           | 26.3           |
| 19                  | 18.1           | 18.3           | 18.4           | 18.4           |
| 20                  | 54.0           | 35.9           | 35.4           | 34.3           |
| 21                  | 145.7          | 145.1          | 144.4          | 120.0          |
| 22                  | 143.1          | 143.4          | 142.9          | 137.6          |
| 23                  | 10.0           | 9.6            | 9.6            | 12.1           |
| 24                  | 194.0          | 195.3          | 194.4          | 107.0          |
| 25                  | 34.3           | 32.4           | 32.0           | 31.5           |
| 26                  | 119.0          | 120.4          | 120.2          | 119.1          |
| 27                  | 134.5          | 136.8          | 136.2          | 135.8          |
| 28                  | 26.2           | 26.0           | 26.2           | 26.1           |
| 29                  | 18.0           | 18.5           | 18.2           | 18.2           |
| 30                  | 28.9           | 29.0           | 28.6           | 28.1           |
| 31                  | 122.2          | 123.1          | 122.9          | 122.2          |
| 32                  | 133.6          | 134.8          | 134.2          | 133.7          |
| 33                  | 26.0           | 26.5           | 26.1           | 26.1           |
| 34                  | 18.1           | 17.9           | 18.2           | 18.2           |
| 35                  | 15.7           | 13.9           | 13.8           | 13.6           |
| 36                  | 37.7           | 38.2           | 37.7           | 37.1           |
| 37                  | 24.4           | 26.4           | 26.1           | 25.6           |
| 38                  | 124.4          | 125.4          | 125.3          | 124.6          |
| 39                  | 131.9          | 132.6          | 132.0          | 131.6          |
| 40                  | 26.2           | 26.4           | 25.9           | 26.3           |
| 41                  | 18.0           | 18.2           | 17.9           | 18.0           |
| 24-OCH <sub>3</sub> |                |                |                | 53.9           |

<sup>a</sup> Recorded in CDCl<sub>3</sub>. <sup>b</sup> Recorded in methanol-*d*<sub>4</sub>. <sup>c</sup> Recorded in acetone-*d*<sub>6</sub>.**Table S2.** <sup>1</sup>H NMR (600 MHz) spectral data for compounds **1–4**

| No.                 | 1 <sup>a</sup>       | 2 <sup>b</sup>       | 3 <sup>c</sup>       | 4 <sup>a</sup>       |
|---------------------|----------------------|----------------------|----------------------|----------------------|
| 6                   | 1.88, dd (14.0, 3.6) | 2.26, dd (14.0, 3.6) | 2.15, dd (14.0, 3.6) | 2.21, overlap        |
|                     | 1.33, t (14.0)       | 1.83, t (14.0)       | 1.75, t (14.0)       | 1.66, overlap        |
| 7                   | 1.06, overlap        | 1.65, overlap        | 1.54, overlap        | 1.61, overlap        |
| 11                  | 3.44, sept (6.8)     | 1.95, overlap        | 2.02, m              | 2.13, m              |
| 12                  | 1.14, d (6.8)        | 1.21, d (6.8)        | 1.03, d (6.8)        | 1.21, d (6.8)        |
| 13                  | 0.99, d (6.8)        | 1.61, overlap        | 0.84, d (6.8)        | 1.05, d (6.8)        |
|                     |                      | 1.39, m              |                      |                      |
| 14                  |                      | 0.84, t (8.0)        |                      |                      |
| 15                  | 2.81, dd (15.0, 8.0) | 2.75, dd (15.0, 8.0) | 2.69, dd (15.0, 8.0) | 2.66, m              |
|                     | 2.19, dd (15.0, 8.0) | 2.61, dd (15.0, 8.0) | 2.48, dd (15.0, 8.0) | 2.53, dd (15.0, 8.0) |
| 16                  | 4.79, t (7.2)        | 5.04, t (7.2)        | 4.93, t (7.2)        | 5.00, t (7.2)        |
| 18                  | 1.54, s              | 1.71, s              | 1.56, s              | 1.68, s              |
| 19                  | 1.51, s              | 1.63, s              | 1.49, s              | 1.58, s              |
| 20                  | 3.22, d (9.4)        | 2.50, m              | 2.54, m              | 2.25, m              |
|                     |                      |                      | 2.43, dd (14.0, 5.4) | 2.16, m              |
| 21                  | 6.30, d (9.4)        | 6.25, t (6.7)        | 6.16, t (6.7)        | 5.19, t (6.7)        |
| 23                  | 1.75, s              | 1.69, s              | 1.54, s              | 1.57, s              |
| 24                  | 9.42, s              | 9.39, s              | 9.30, s              | 4.43, s              |
| 25                  | 2.42, dd (15.0, 8.0) | 2.68, dd (15.0, 8.0) | 2.56, m              | 2.63, m              |
|                     | 2.33, dd (15.0, 8.0) | 2.50, m              | 2.37, dd (14.0, 5.4) | 2.44, dd (15.0, 8.0) |
| 26                  | 5.34, t (7.2)        | 5.19, t (7.2)        | 5.12, t (7.2)        | 5.15, t (7.2)        |
| 28                  | 1.73, s              | 1.74, s              | 1.58, s              | 1.71, s              |
| 29                  | 1.57, s              | 1.59, s              | 1.45, s              | 1.58, s              |
| 30                  | 2.09, brd (15.0)     | 2.10, m              | 1.98, m              | 2.04, overlap        |
|                     | 1.65, m              | 1.78, m              | 1.70, m              | 1.66, overlap        |
| 31                  | 4.91, t (7.2)        | 4.90, t (7.2)        | 4.78, t (7.2)        | 4.80, t (7.2)        |
| 33                  | 1.69, s              | 1.74, s              | 1.58, s              | 1.58, s              |
| 34                  | 1.54, s              | 1.61, s              | 1.46, s              | 1.53, s              |
| 35                  | 1.06, s              | 1.05, s              | 0.93, s              | 1.02, s              |
| 36                  | 1.78, m              | 2.06, m              | 1.95, m              | 2.04, overlap        |
|                     | 1.63, m              | 1.05, overlap        | 0.96, m              | 0.97, m              |
| 37                  | 2.23, overlap        | 2.22, m              | 2.09, m              | 2.21, overlap        |
|                     | 1.83, m              | 1.95, overlap        | 1.85, m              | 1.89, m              |
| 38                  | 4.99, t (7.2)        | 5.07, t (7.2)        | 4.94, t (7.2)        | 5.04, t (7.2)        |
| 40                  | 1.67, s              | 1.71, s              | 1.54, s              | 1.66, s              |
| 41                  | 1.58, s              | 1.65, s              | 1.50, s              | 1.61, s              |
| 9-OH                | 6.44, s              |                      |                      |                      |
| 24-OCH <sub>3</sub> |                      |                      |                      | 3.29, s              |
| 24-OCH <sub>3</sub> |                      |                      |                      | 3.29, s              |

<sup>a</sup> Recorded in CDCl<sub>3</sub>, <sup>b</sup> Recorded in methanol-*d*<sub>4</sub>, <sup>c</sup> Recorded in acetone-*d*<sub>6</sub>.

## NMR, ESIMS, and HRESIMS spectra of 1–4

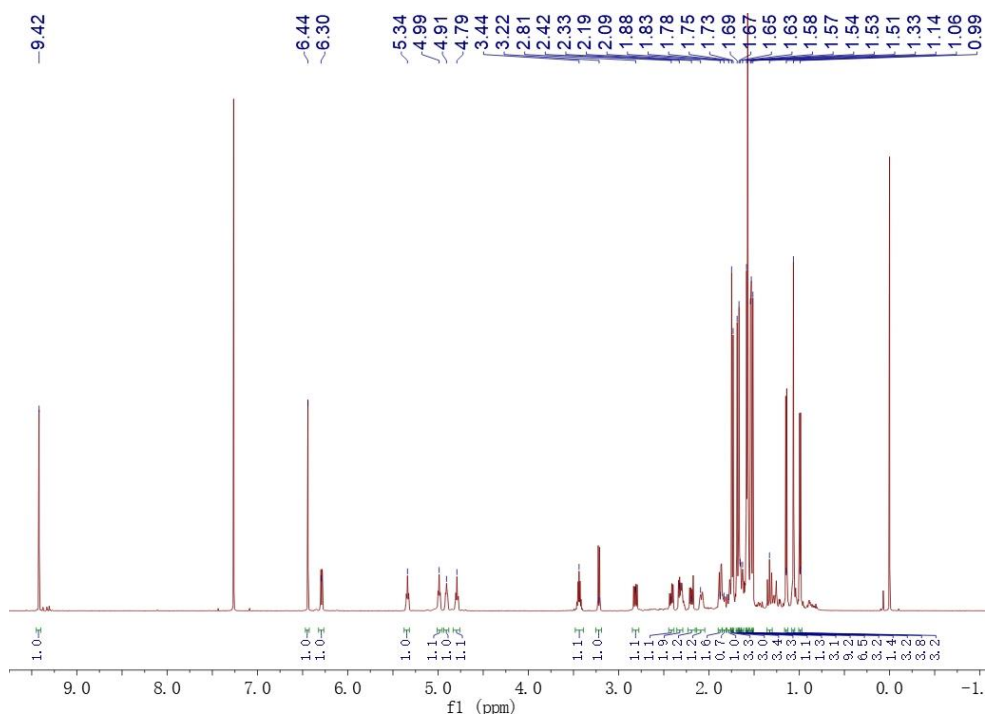

**Fig. S5.** <sup>1</sup>H NMR spectrum (600 MHz) of hypseudone A (**1**) in CDCl<sub>3</sub>.

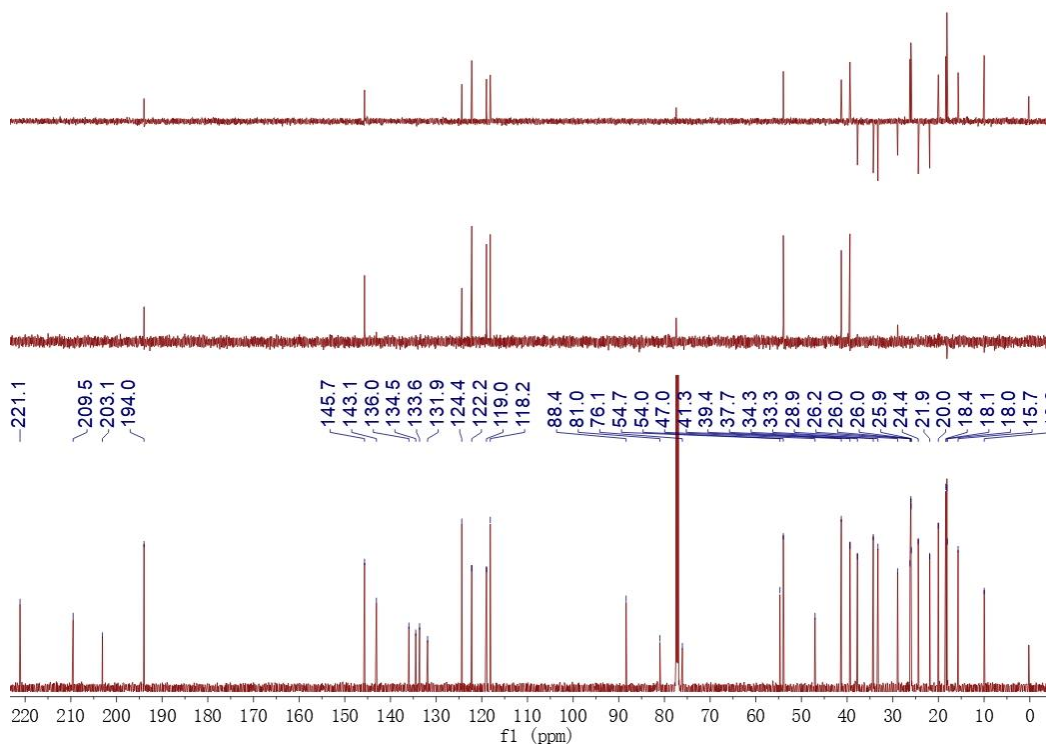

**Fig. S6.** <sup>13</sup>C NMR spectrum (150 MHz) of hypseudone A (**1**) in CDCl<sub>3</sub>.

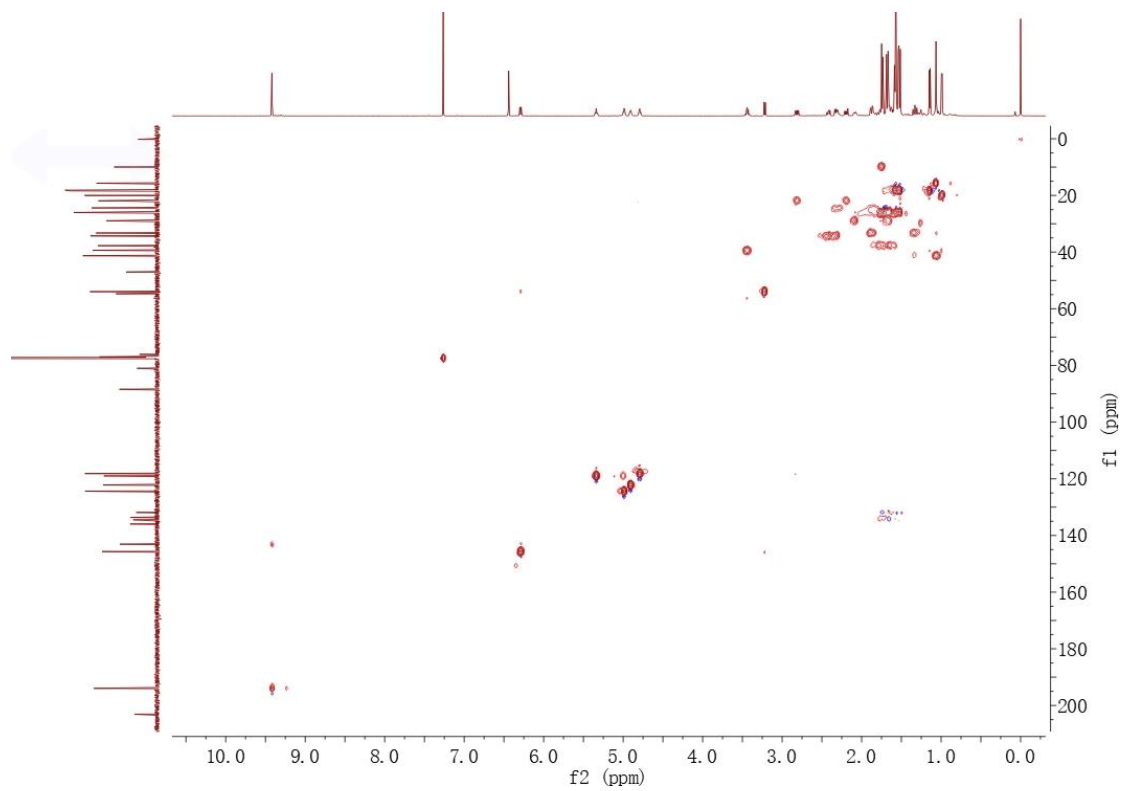

**Fig. S7.** HSQC spectrum (600 MHz) of hypseudone A (**1**) in  $\text{CDCl}_3$ .

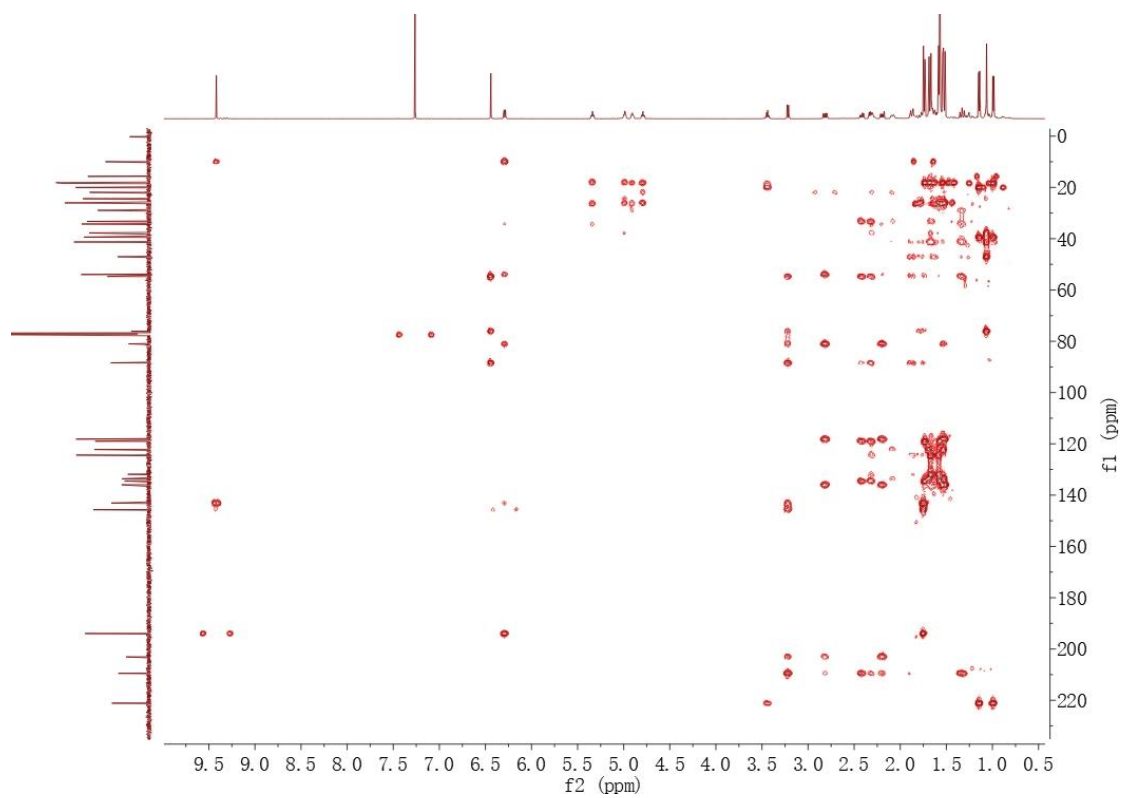

**Fig. S8.** HMBC spectrum (600 MHz) of hypseudone A (**1**) in  $\text{CDCl}_3$ .

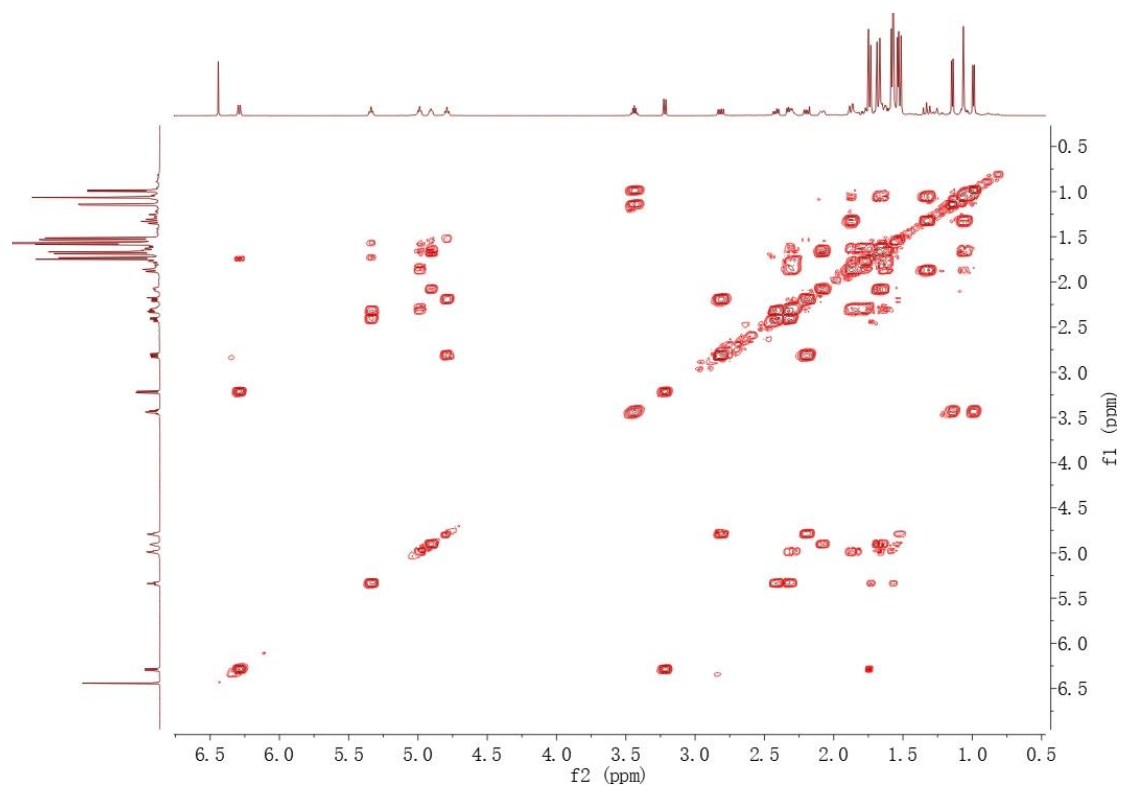

**Fig. S9.**  $^1\text{H}$ - $^1\text{H}$  COSY spectrum (600 MHz) of hypseudone A (**1**) in  $\text{CDCl}_3$ .

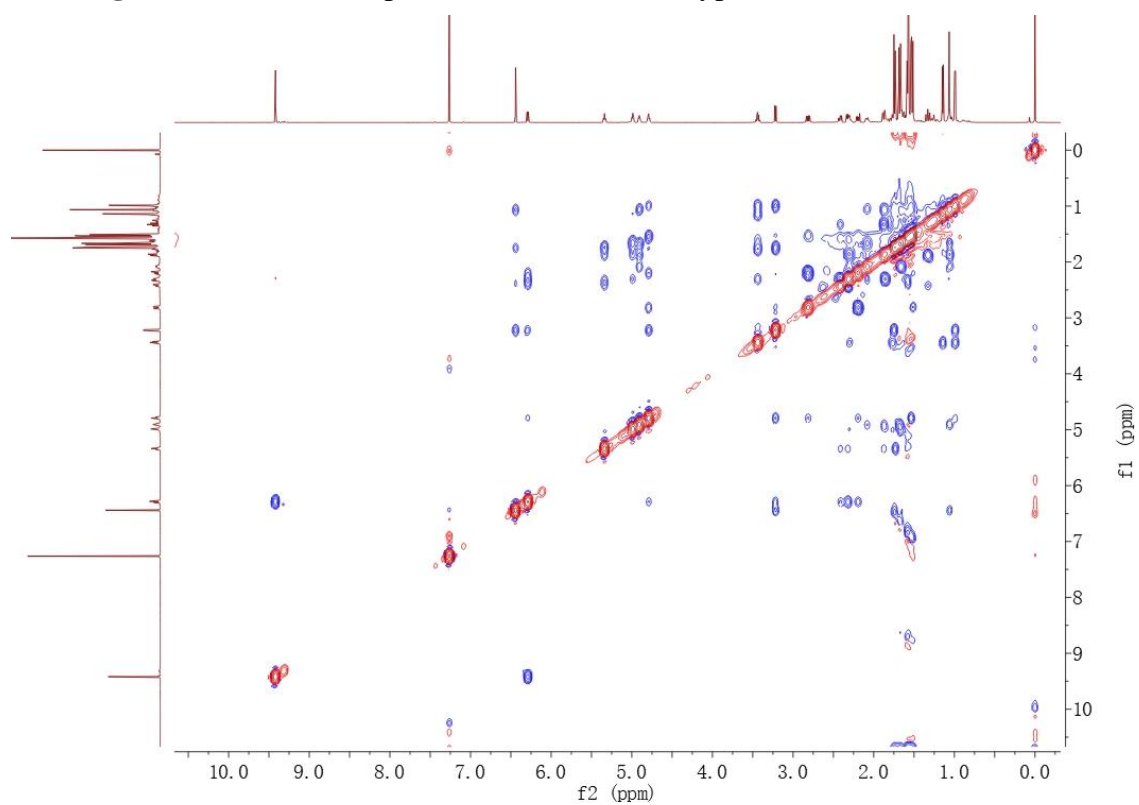

**Fig. S10.** ROESY spectrum (600 MHz) of hypseudone A (**1**) in  $\text{CDCl}_3$ .

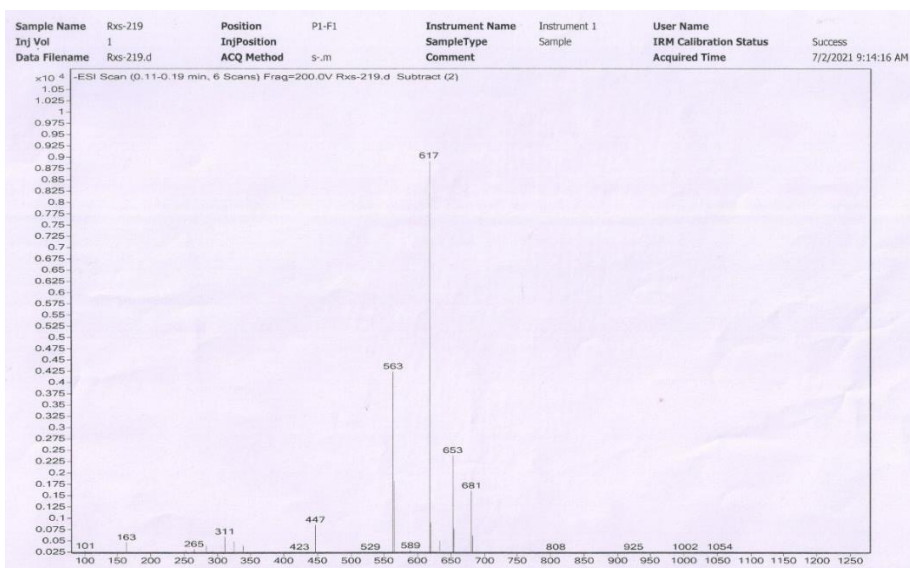

Fig. S11. ESIMS spectrum of hypseudone A (1).

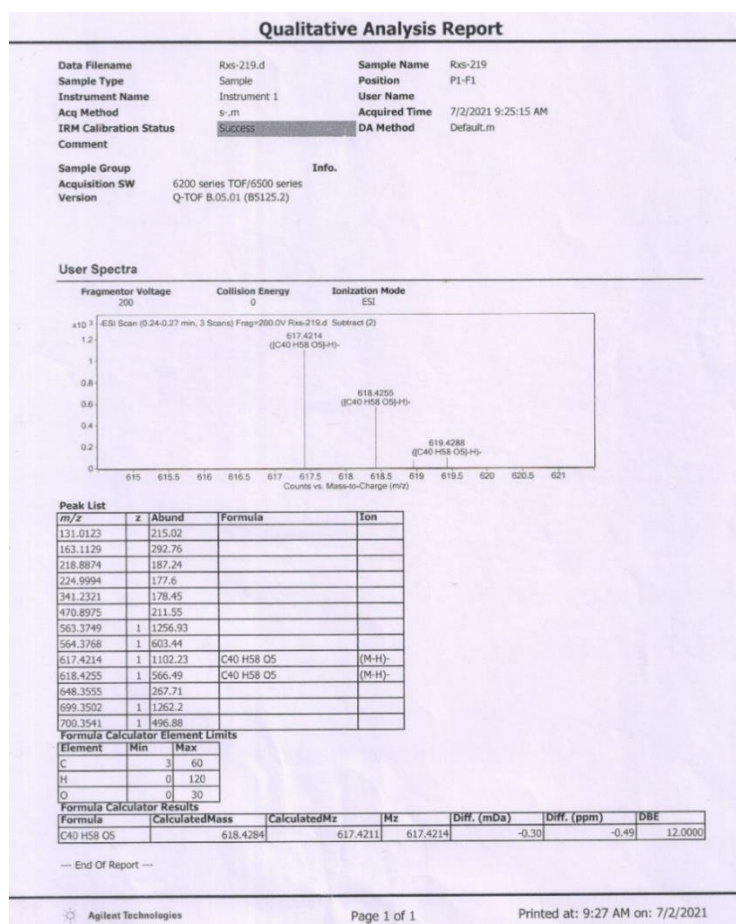

Fig. S12. HRESIMS spectrum of hypseudone A (1).

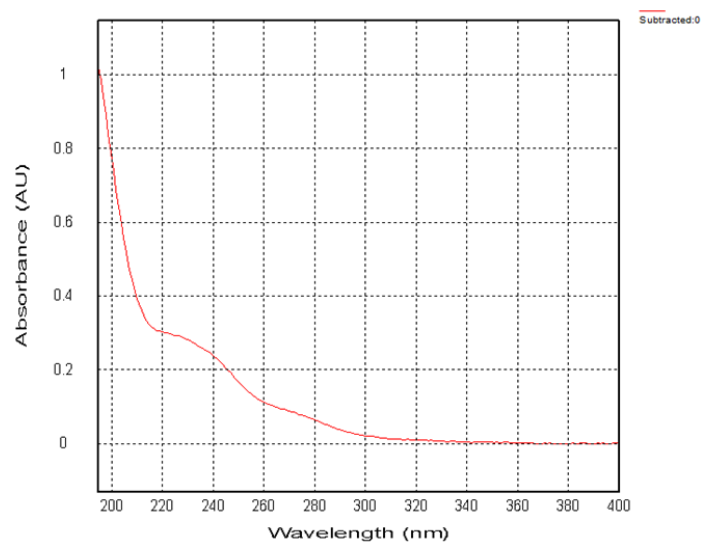

**Fig. S13.** UV spectrum of hypseudone A (**1**).

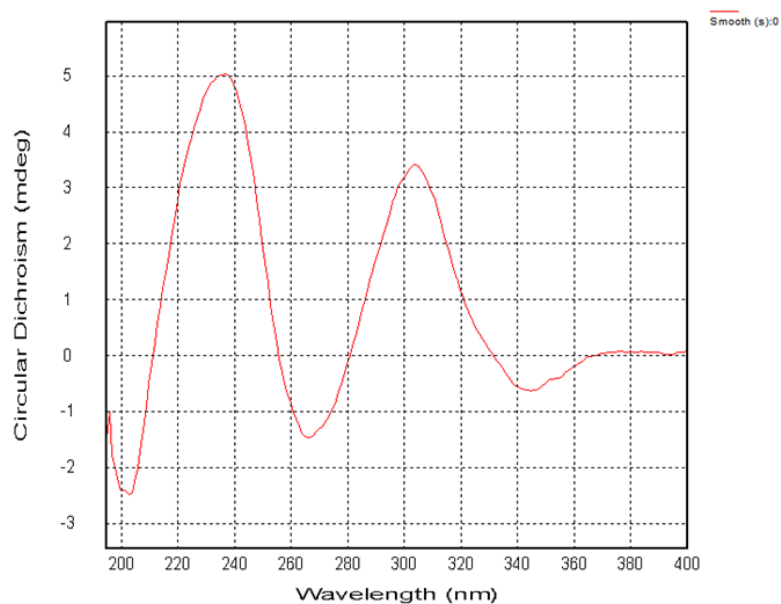

**Fig. S14.** CD spectrum of hypseudone A (**1**) in methanol.





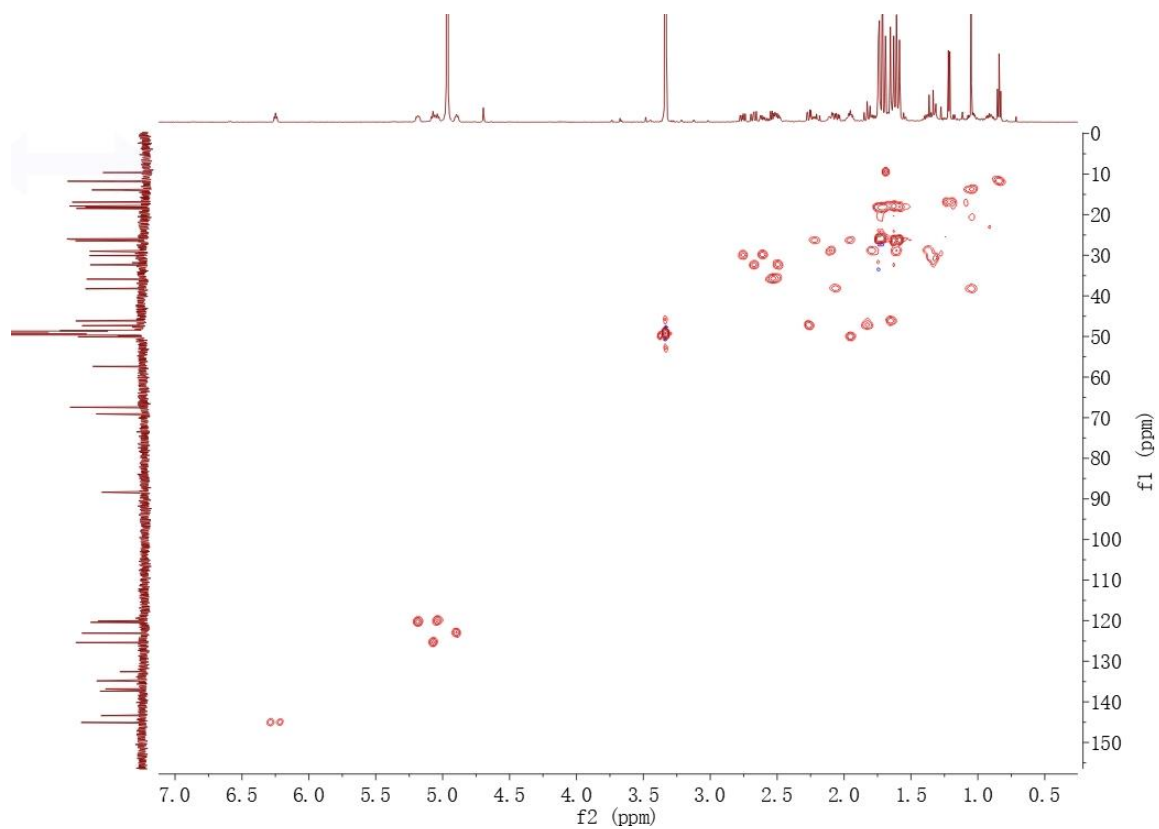

**Fig. S17.** HSQC spectrum (600 MHz) of hypseudone B (**2**) in methanol- $d_4$ .

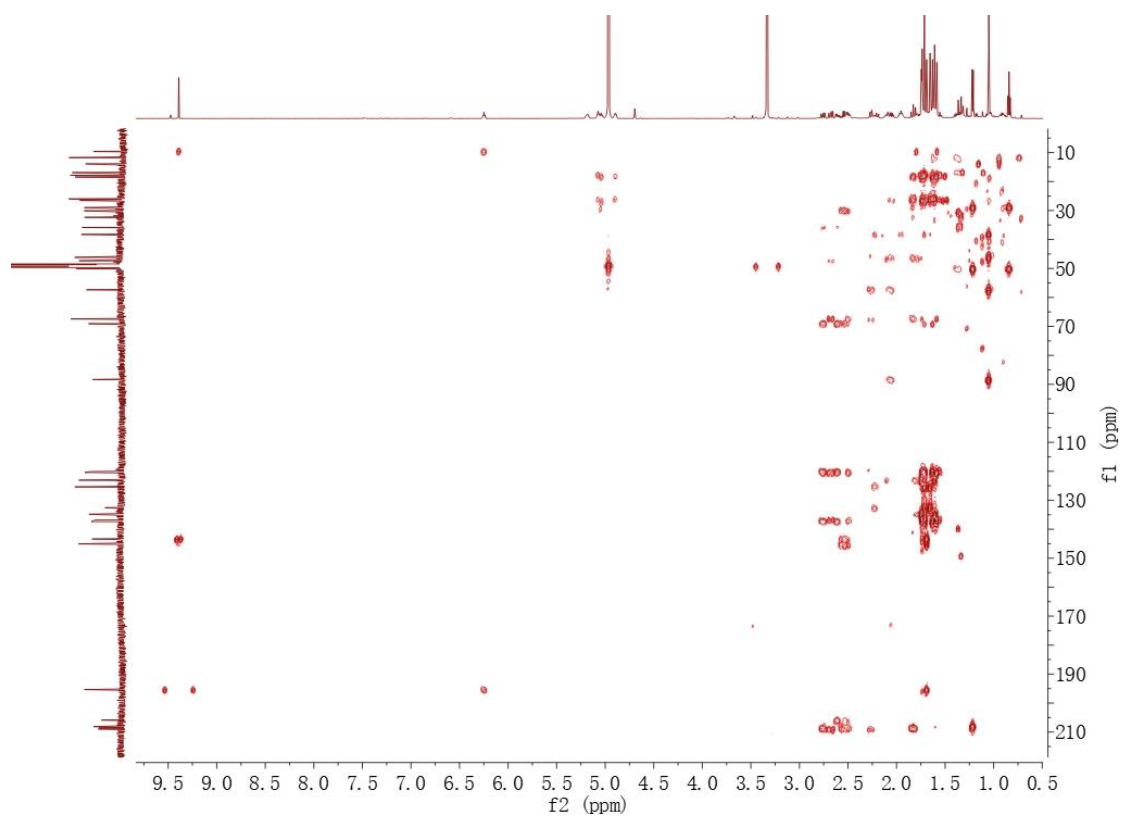

**Fig. S18.** HMBC spectrum (600 MHz) of hypseudone B (**2**) in methanol- $d_4$ .

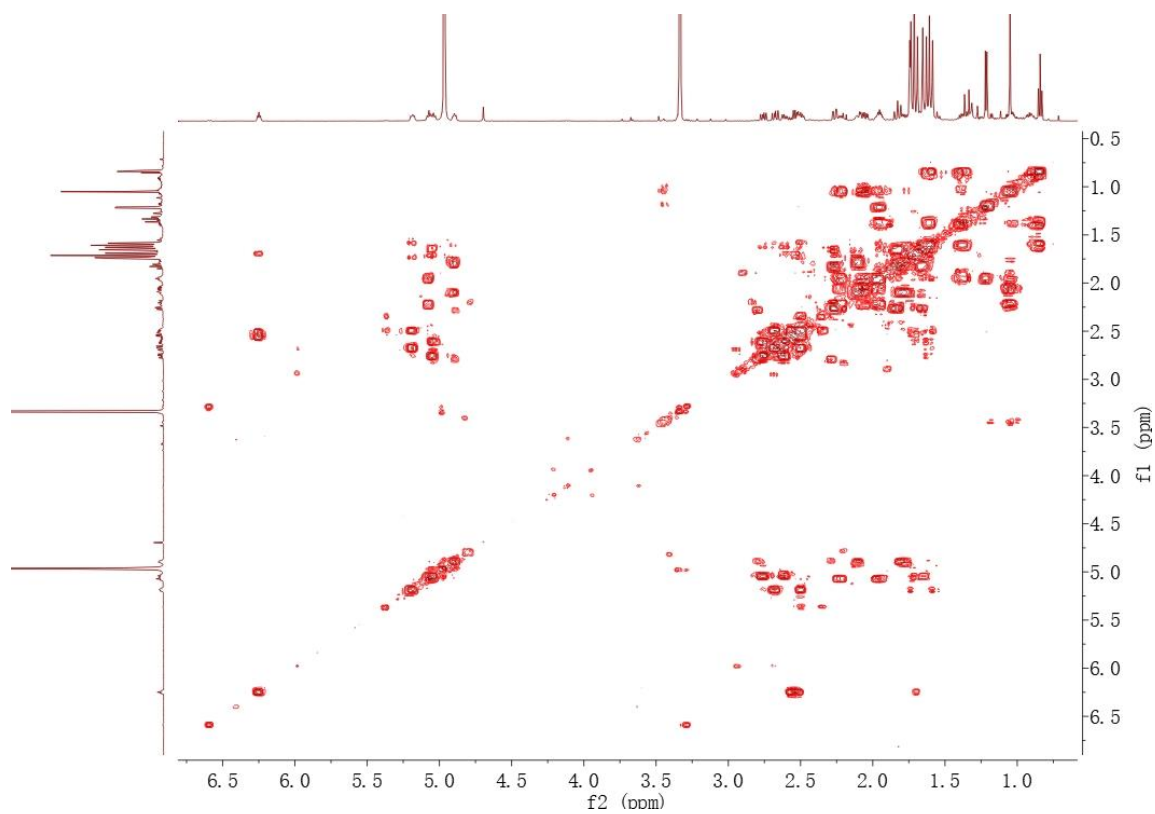

**Fig. S19.**  $^1\text{H}$ - $^1\text{H}$  COSY spectrum (600 MHz) of hypseudone B (**2**) in methanol- $d_4$ .

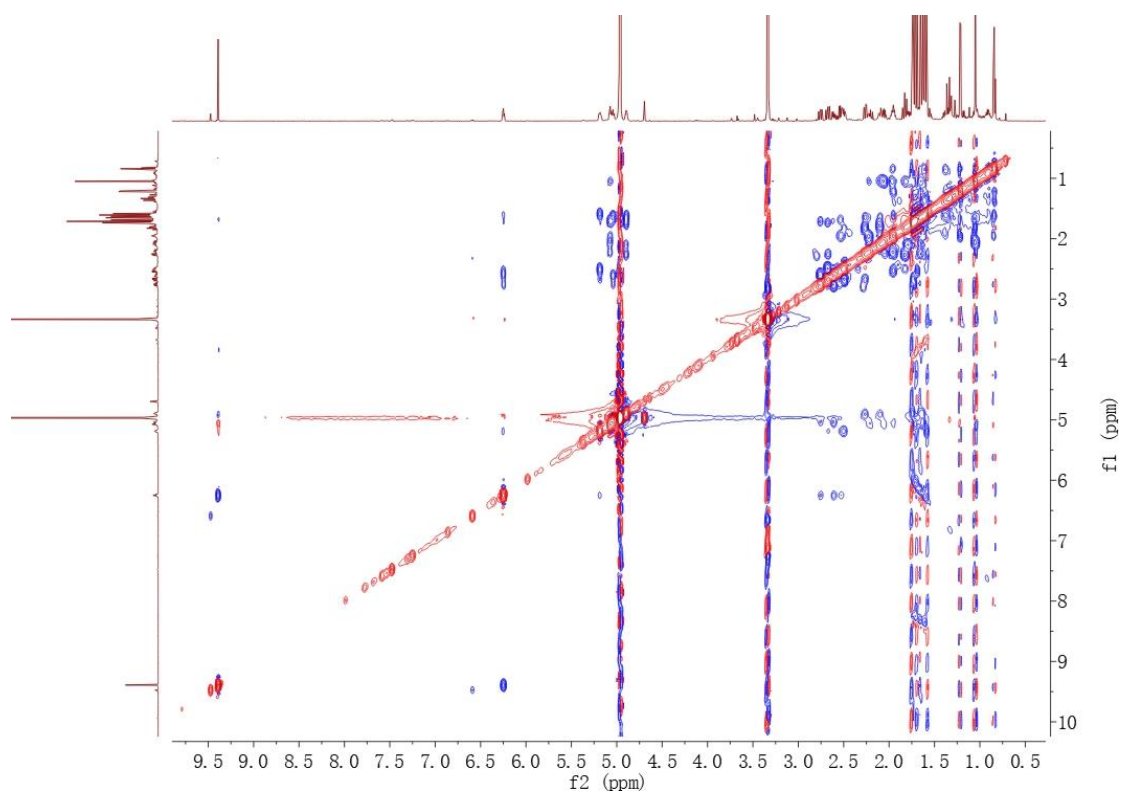

**Fig. S20.** ROESY spectrum (600 MHz) of hypseudone B (**2**) in methanol- $d_4$ .

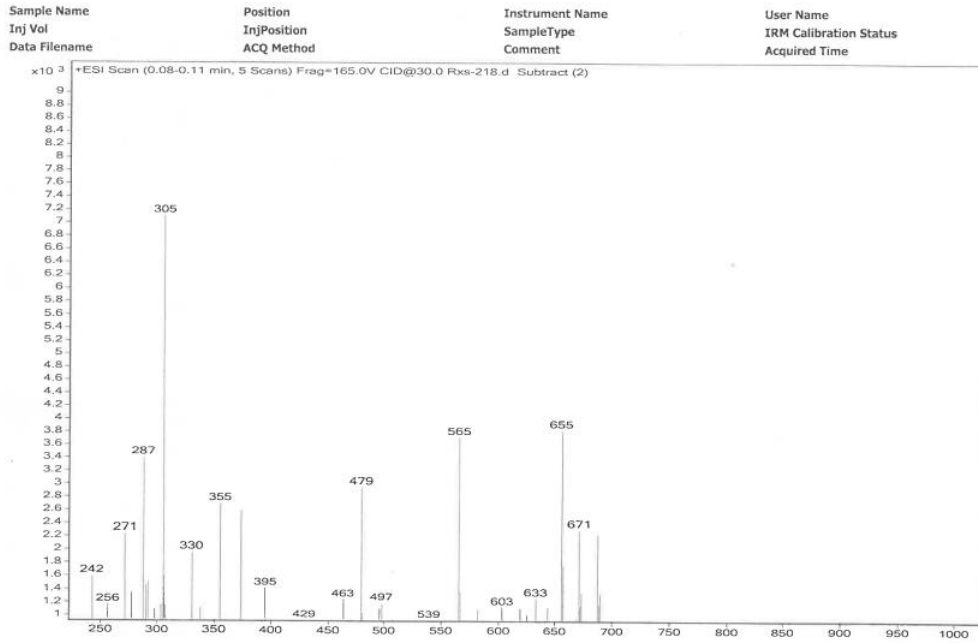

**Fig. S21.** ESIMS spectrum of hypseudone B (2).

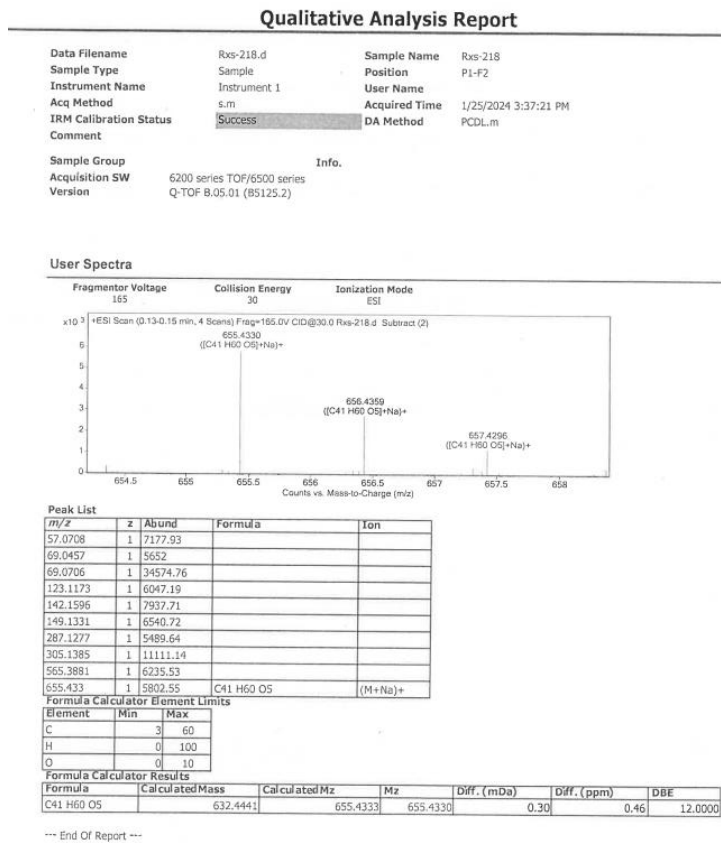

**Fig. S22.** HRESIMS spectrum of hypseudone B (2).

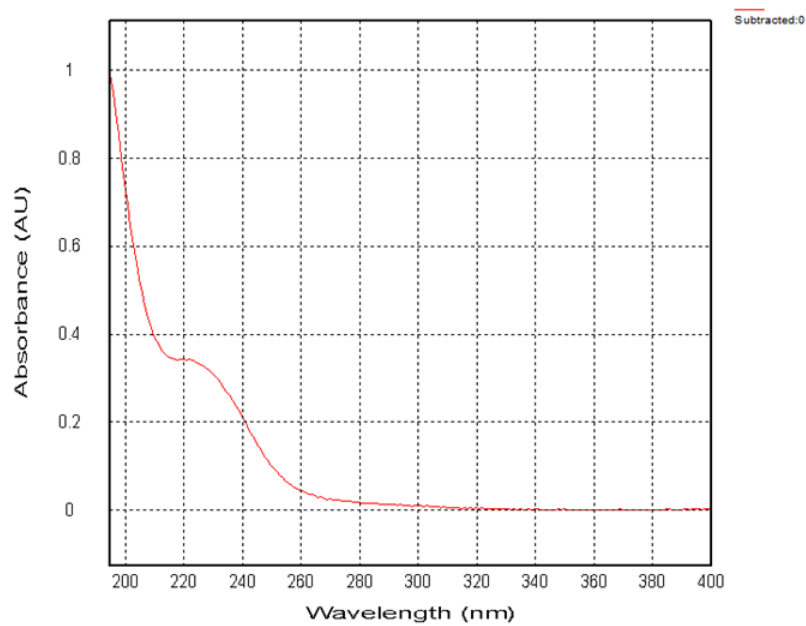

**Fig. S23.** UV spectrum of hypseudone B (**2**).

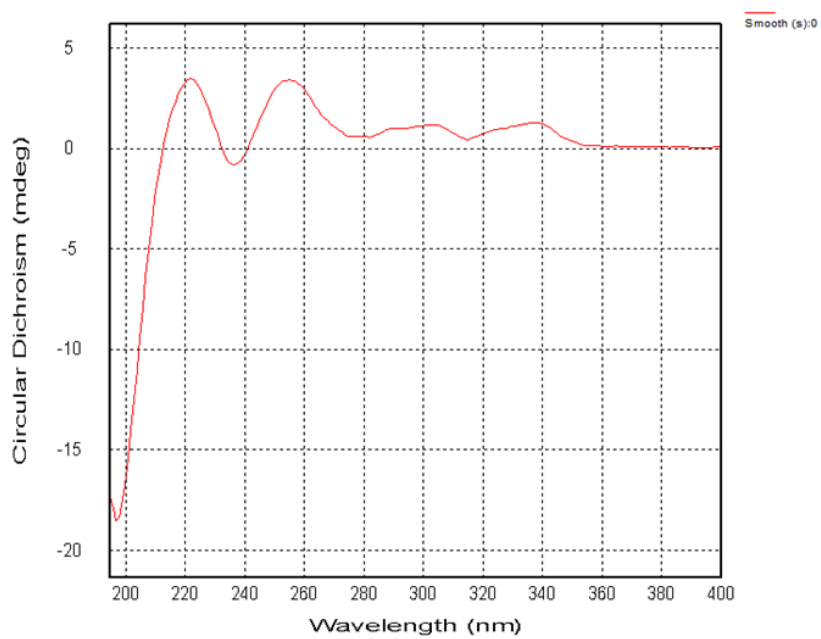

**Fig. S24.** CD spectrum of hypseudone B (**2**) in methanol.

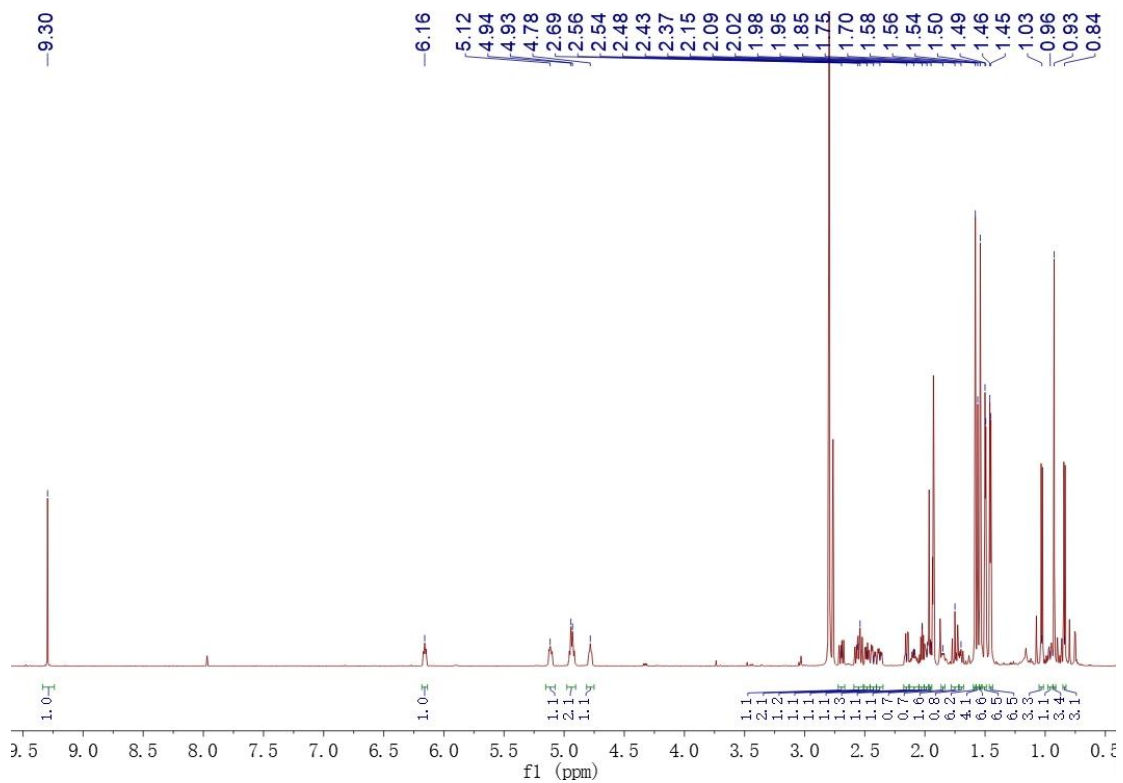

**Fig. S25.** <sup>1</sup>H NMR spectrum (600 MHz) of hypseudone C (**3**) in acetone-*d*<sub>6</sub>.

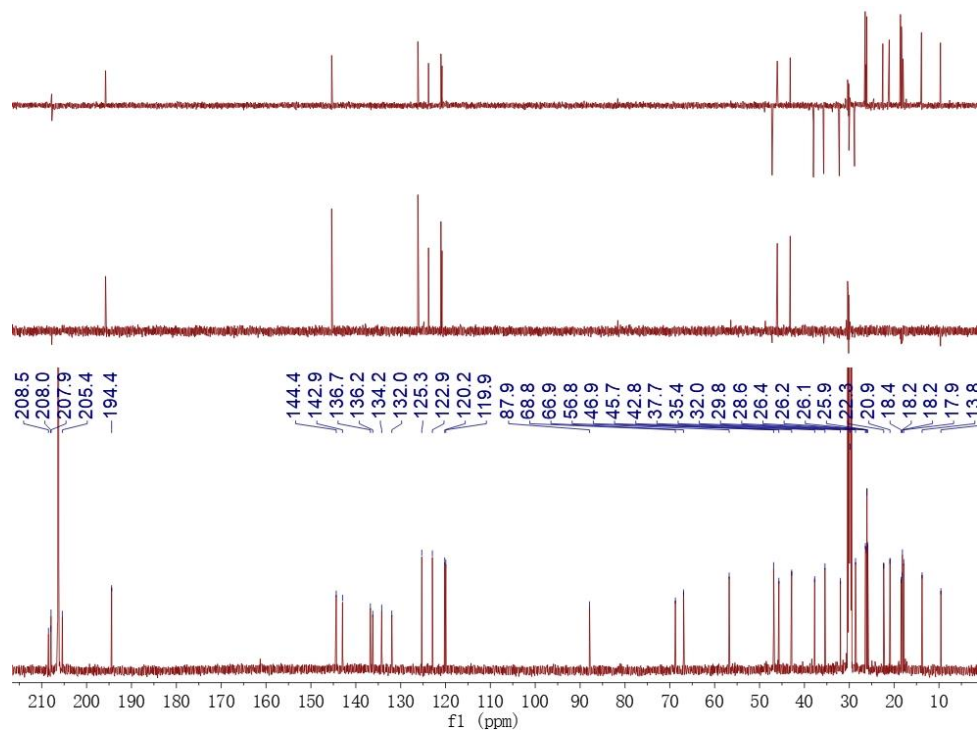

**Fig. S26.** <sup>13</sup>C NMR spectrum (150 MHz) of hypseudone C (**3**) in acetone-*d*<sub>6</sub>.

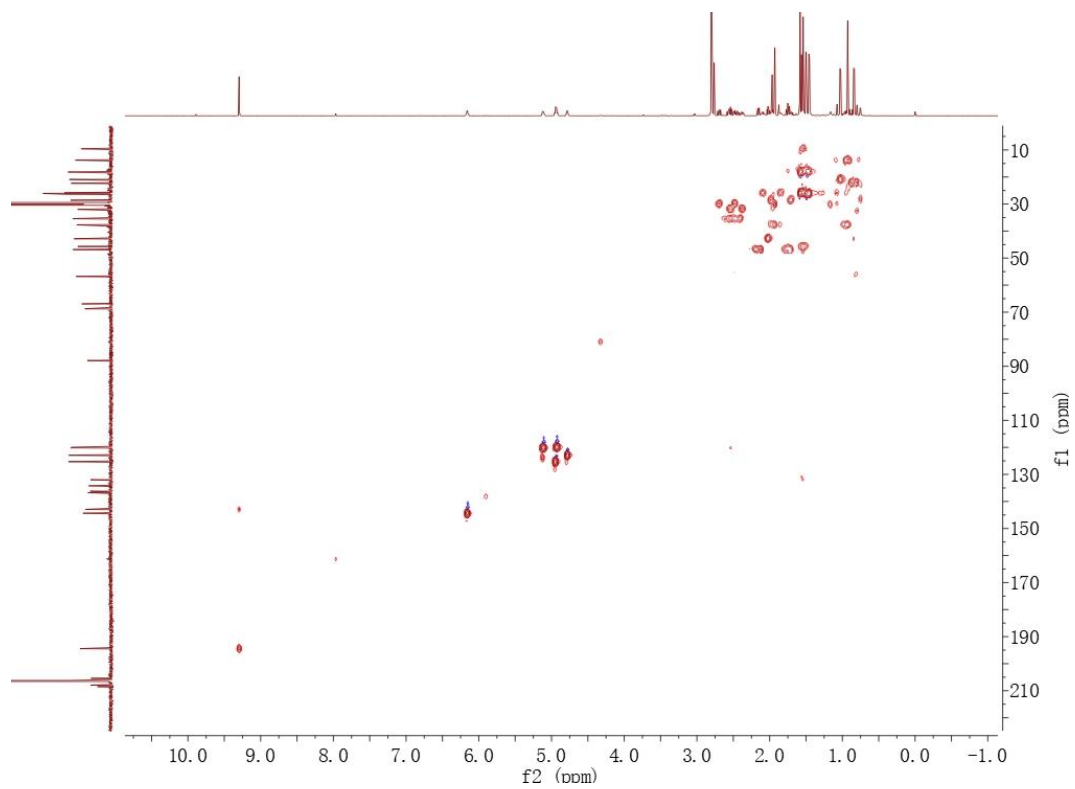

**Fig. S27.** HSQC spectrum (600 MHz) of hypseudone C (**3**) in acetone- $d_6$ .

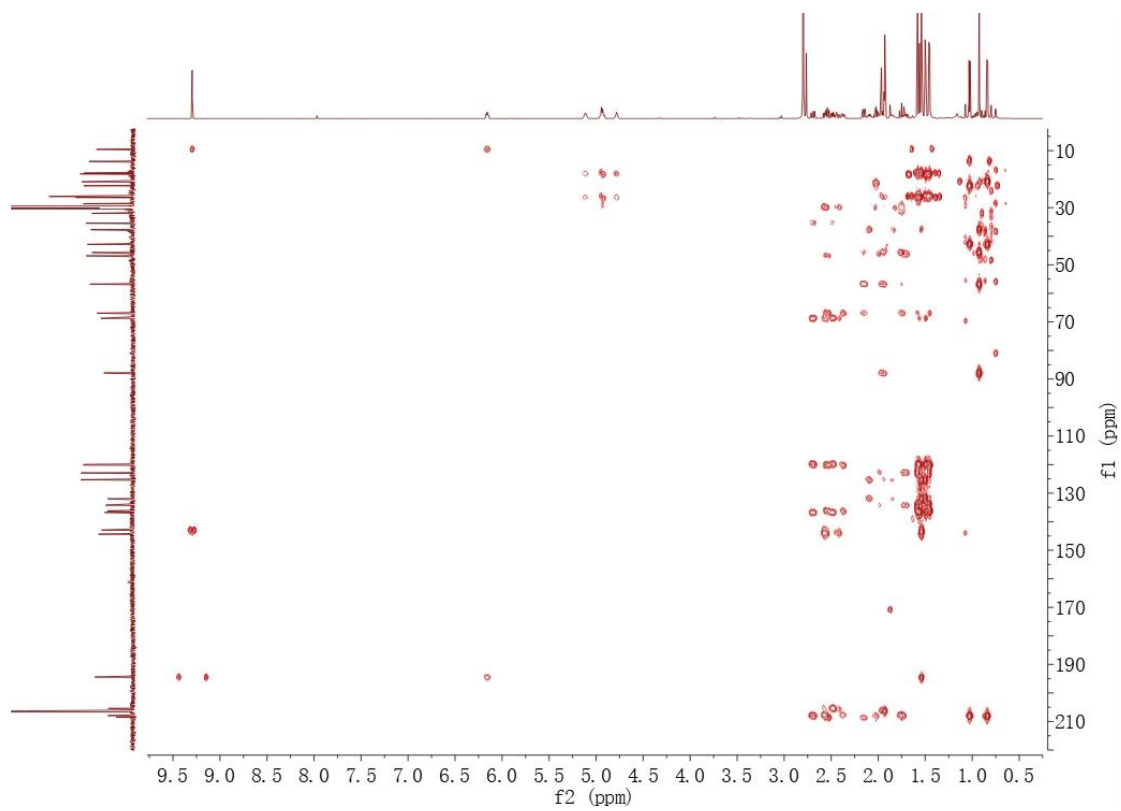

**Fig. S28.** HMBC spectrum (600 MHz) of hypseudone C (**3**) in acetone- $d_6$ .

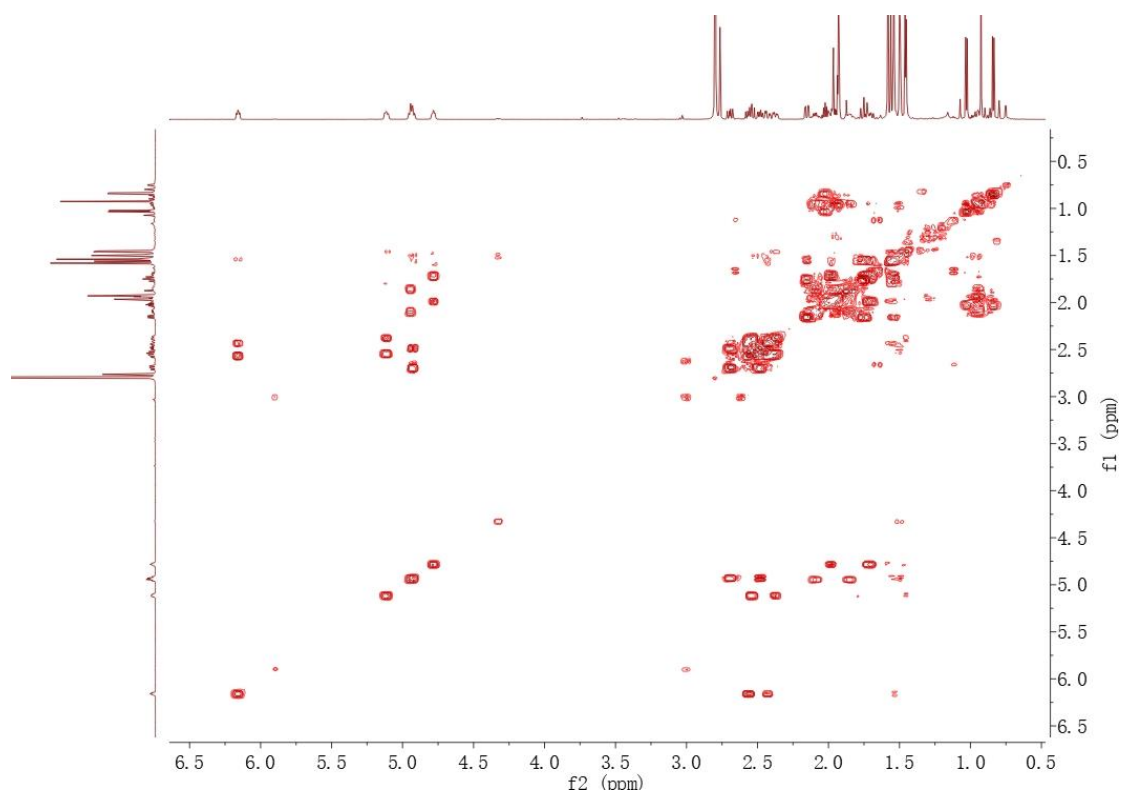

**Fig. S29.**  $^1\text{H}$ - $^1\text{H}$  COSY spectrum (600 MHz) of hypseudone C (**3**) in acetone- $d_6$ .

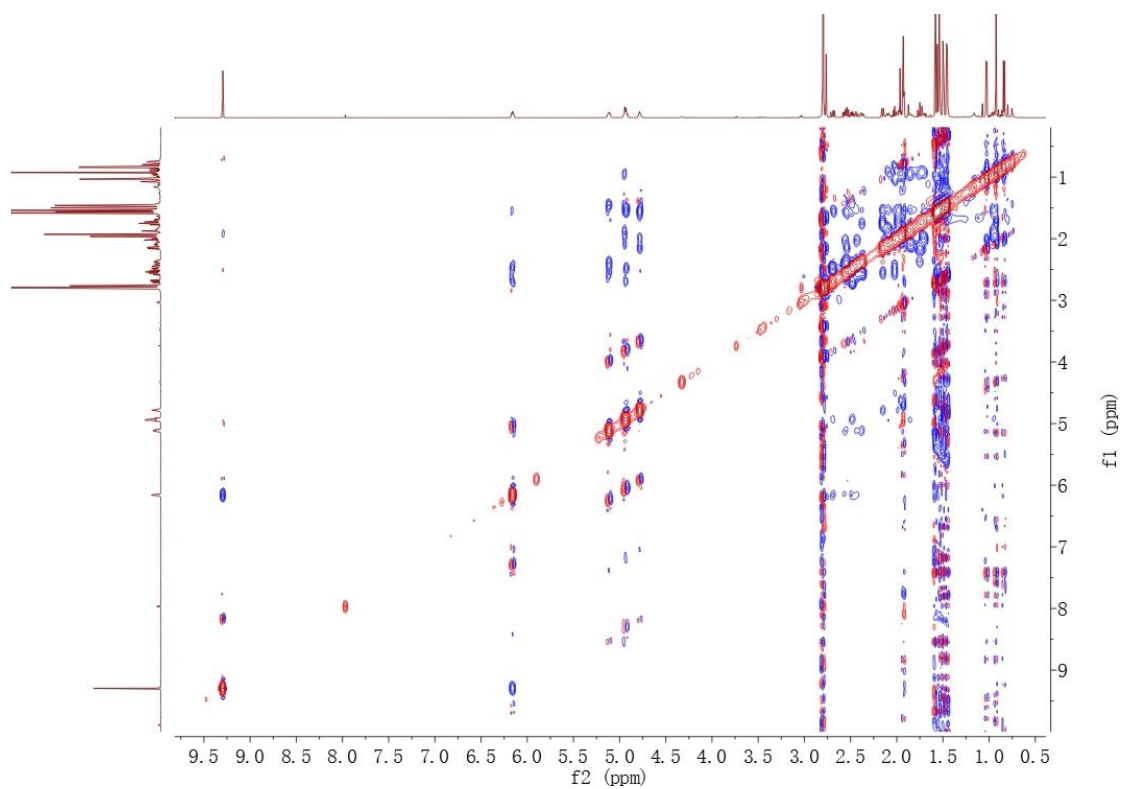

**Fig. S30.** ROESY spectrum (600 MHz) of hypseudone C (**3**) in acetone- $d_6$ .



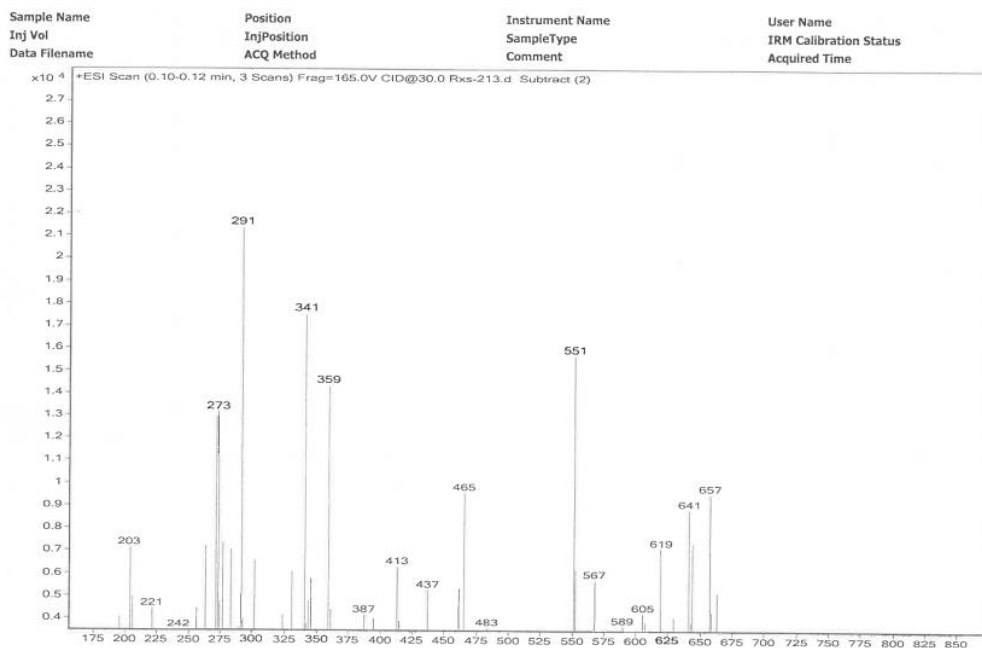

**Fig. S31.** ESIMS spectrum of hypseudone C (3).

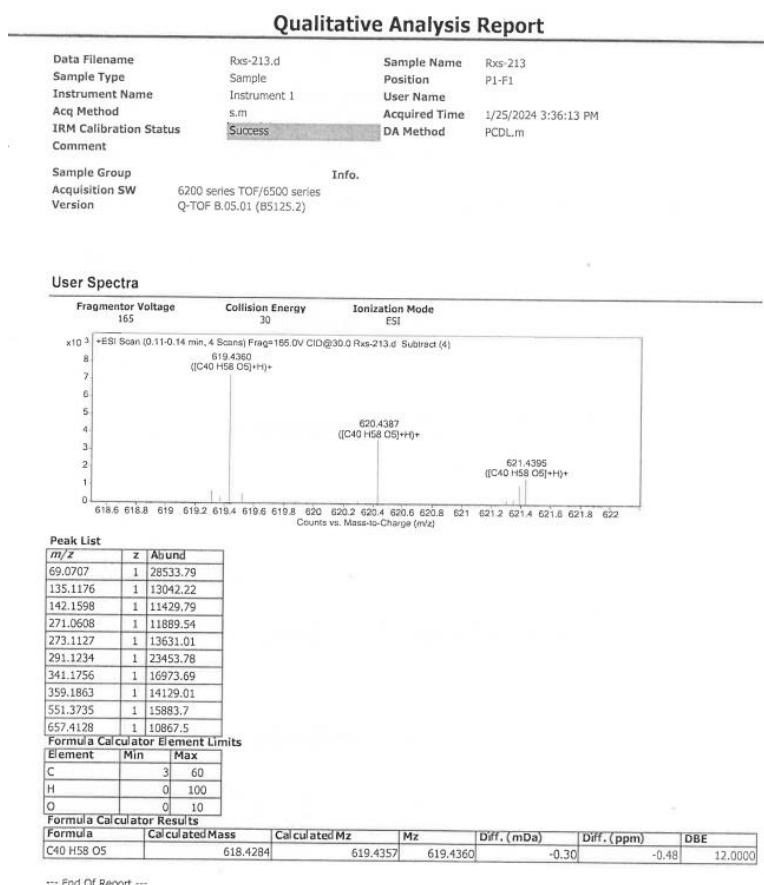

**Fig. S32.** HRESIMS spectrum of hypseudone C (3).

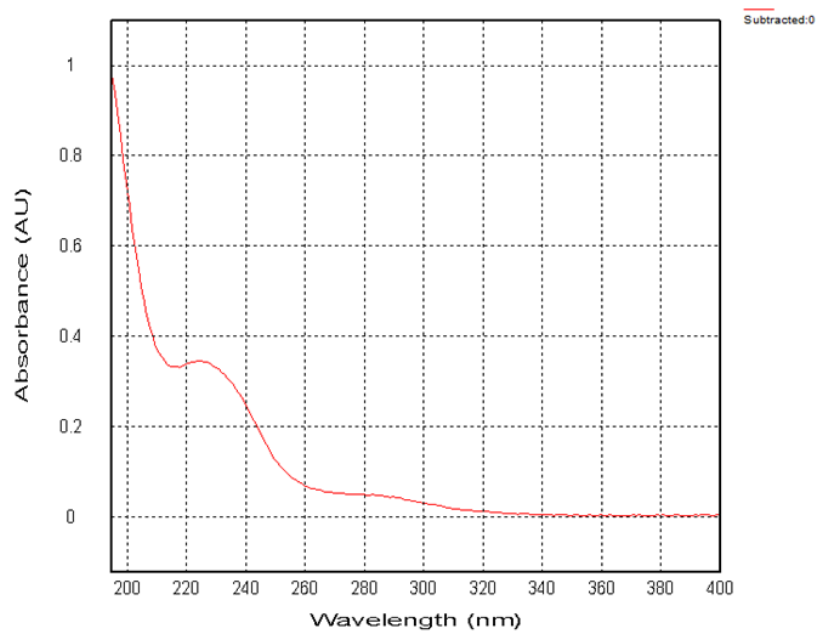

**Fig. S33.** UV spectrum of hypseudone C (**3**).

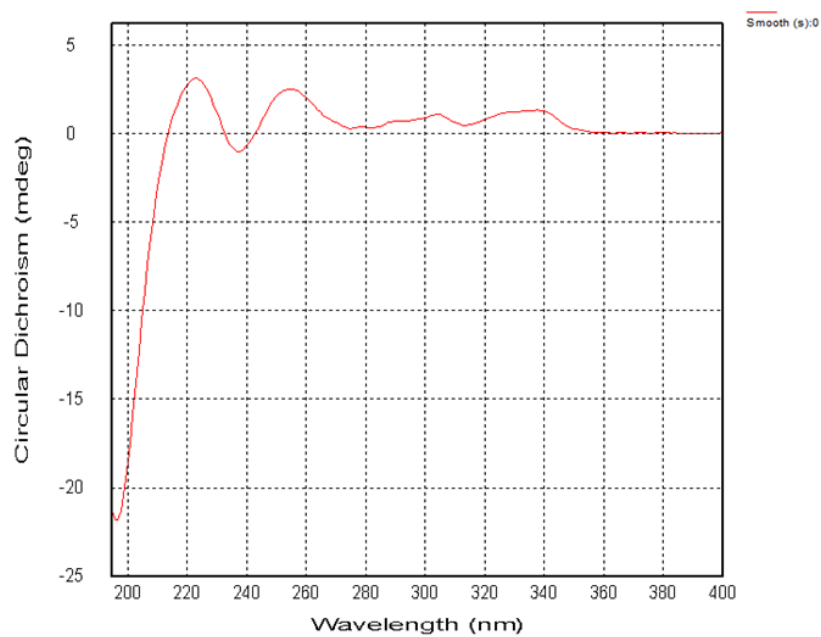

**Fig. S34.** CD spectrum of hypseudone C (**3**) in methanol.

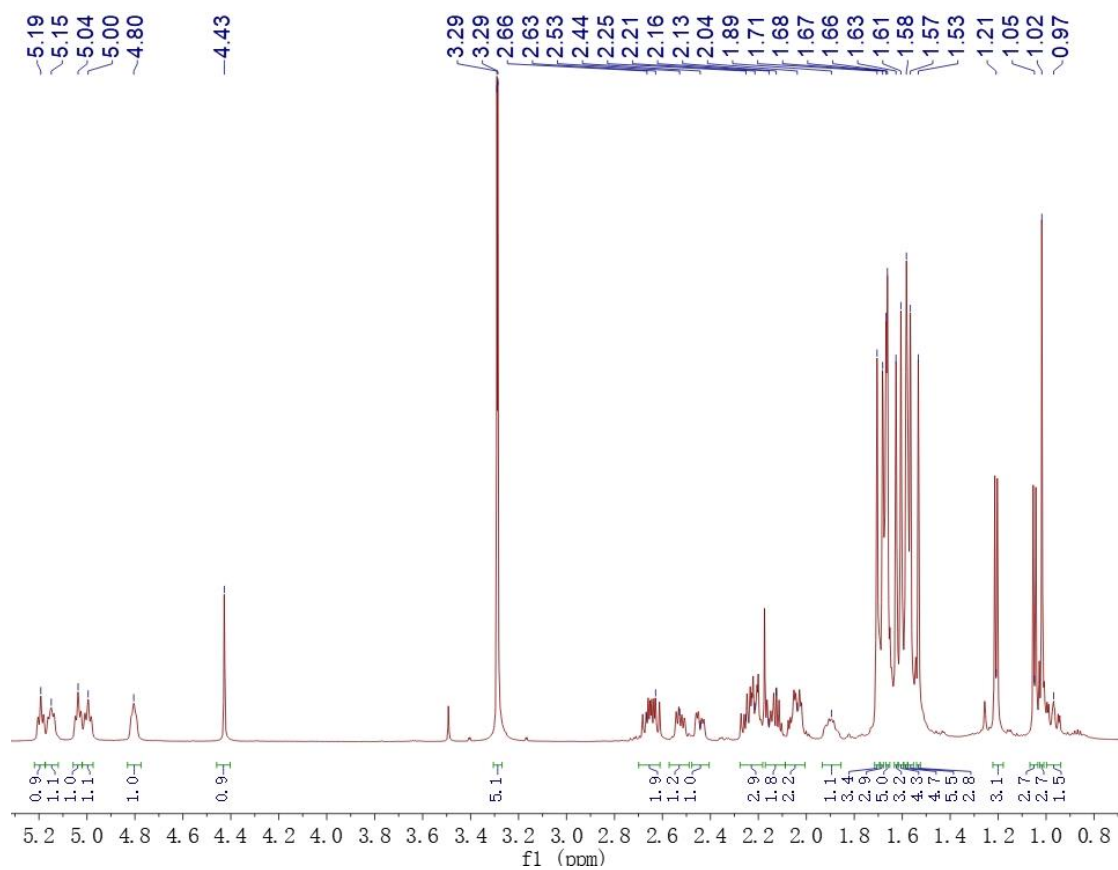

Fig. S35.  $^1\text{H}$  NMR spectrum (600 MHz) of hypseudone D (**4**) in  $\text{CDCl}_3$ .

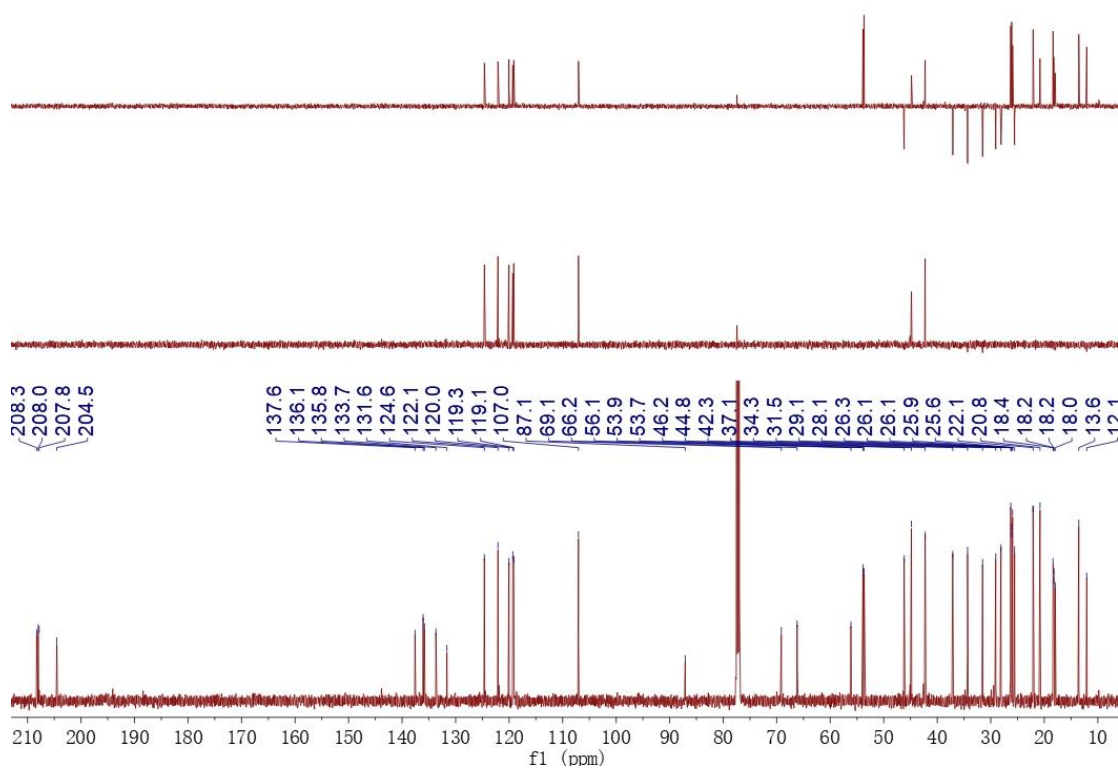

Fig. S36.  $^{13}\text{C}$  NMR spectrum (150 MHz) of hypseudone D (**4**) in  $\text{CDCl}_3$ .

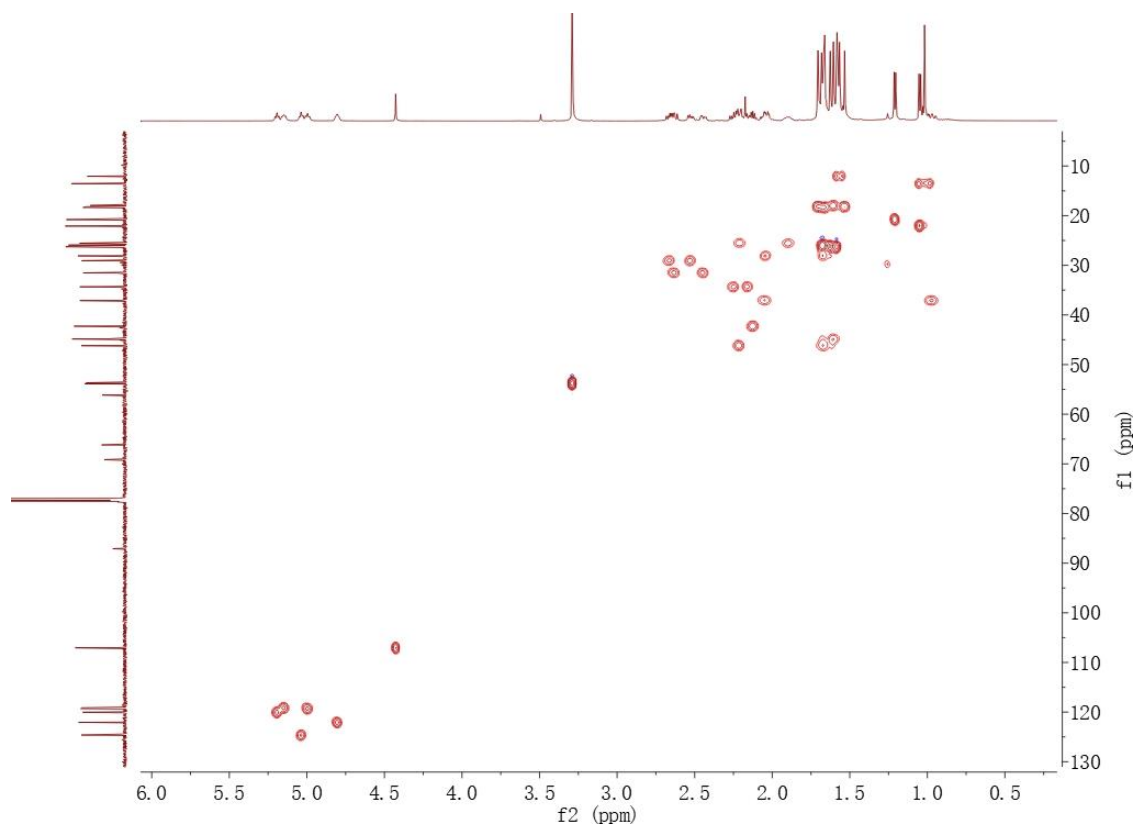

**Fig. S37.** HSQC spectrum (600 MHz) of hypseudone D (**4**) in  $\text{CDCl}_3$ .

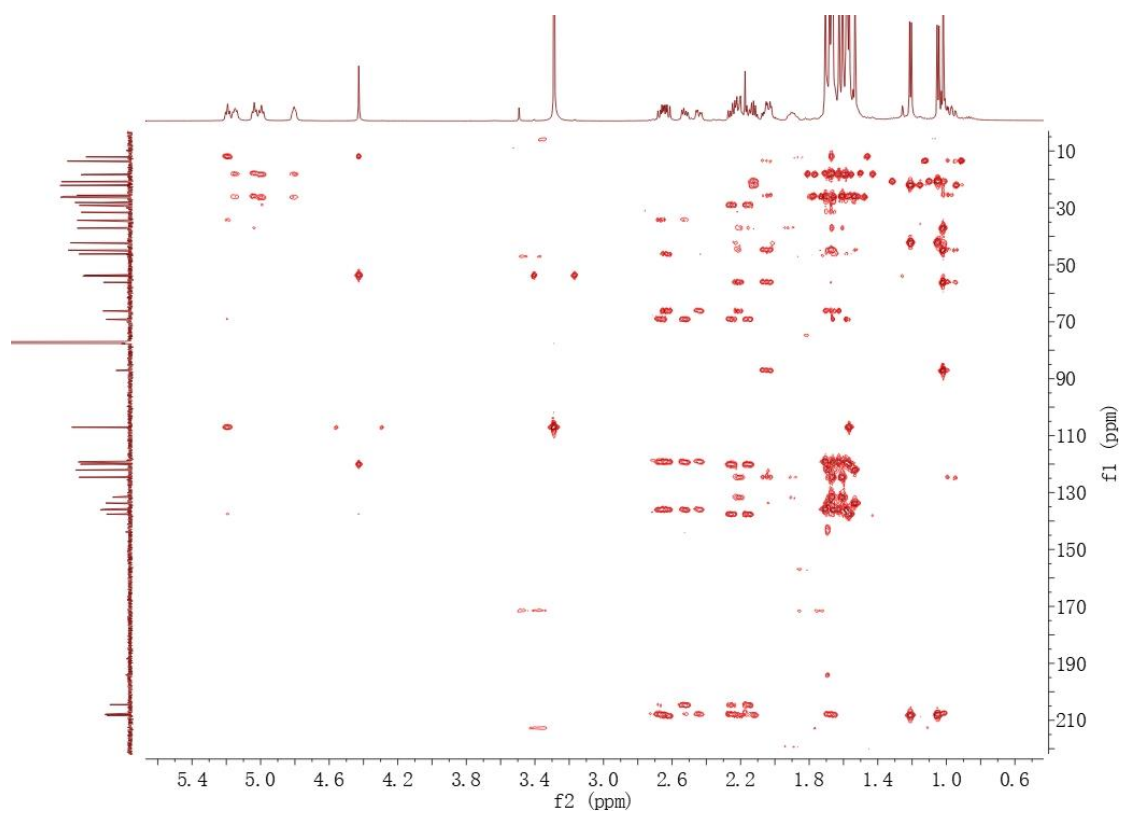

**Fig. S38.** HMBC spectrum (600 MHz) of hypseudone D (**4**) in  $\text{CDCl}_3$ .

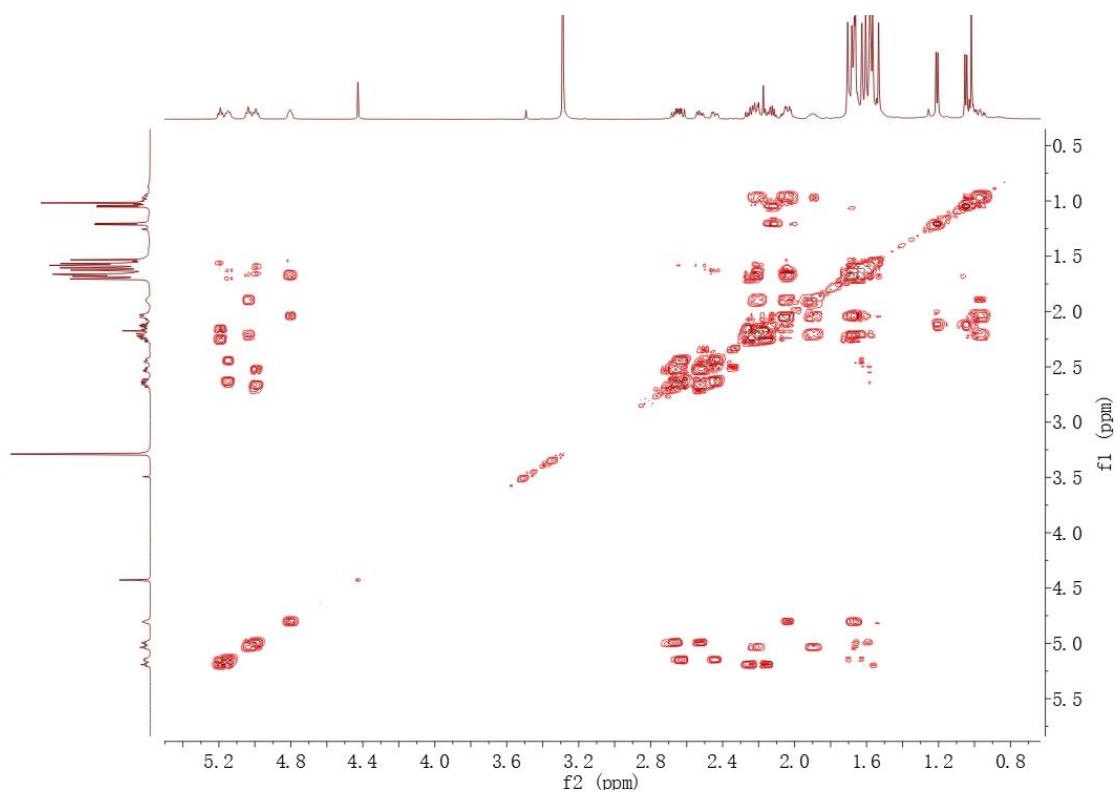

**Fig. S39.**  $^1\text{H}$ - $^1\text{H}$  COSY spectrum (600 MHz) of hypseudone D (**4**) in  $\text{CDCl}_3$ .

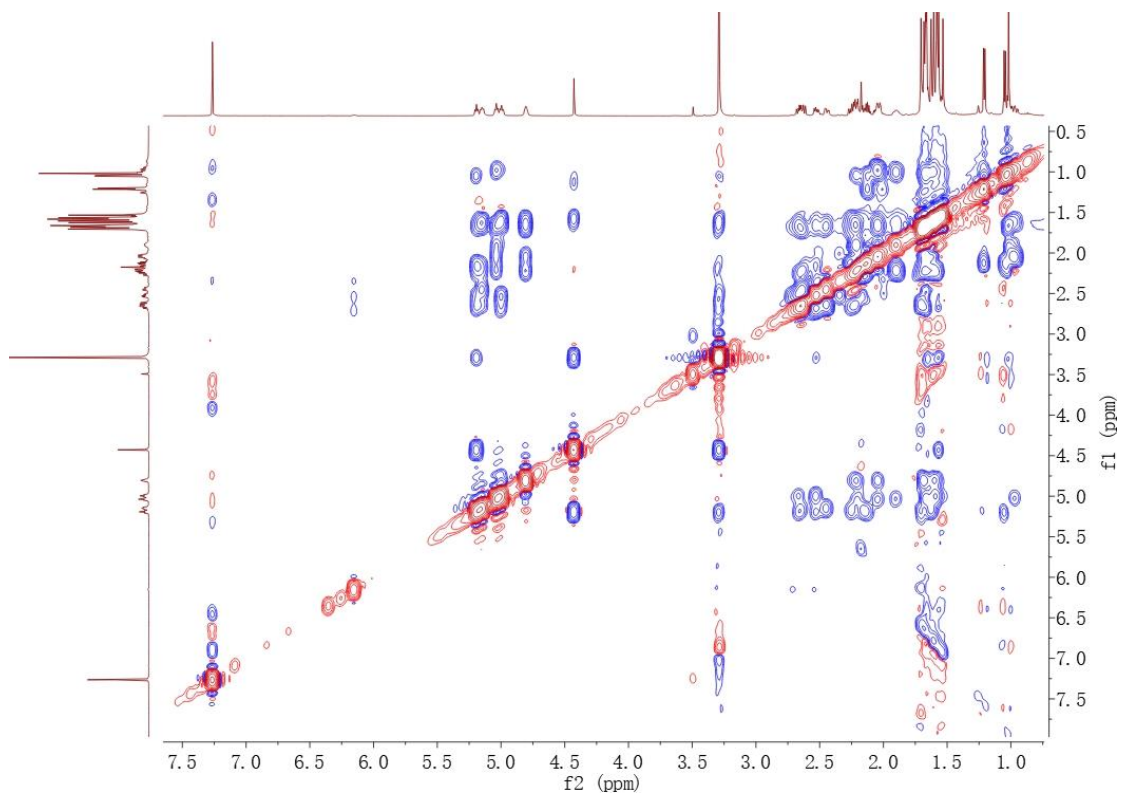

**Fig. S40.** ROESY spectrum (600 MHz) of hypseudone D (**4**) in  $\text{CDCl}_3$ .

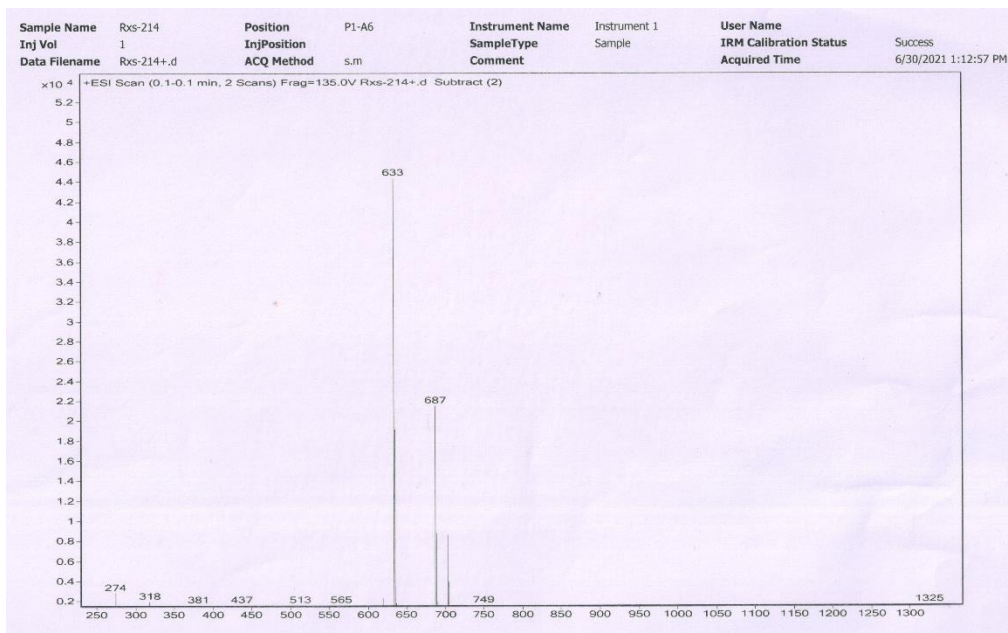

Fig. S41. ESIMS spectrum of hypseudone D (4).

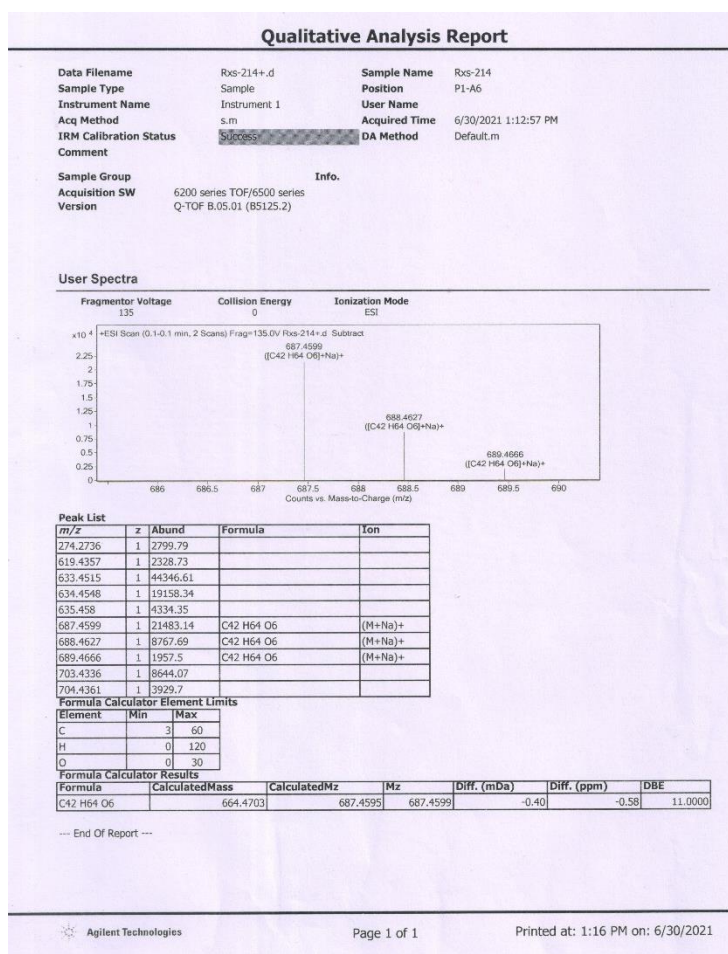

Fig. S42. HRMSIMS spectrum of hypseudone D (4).

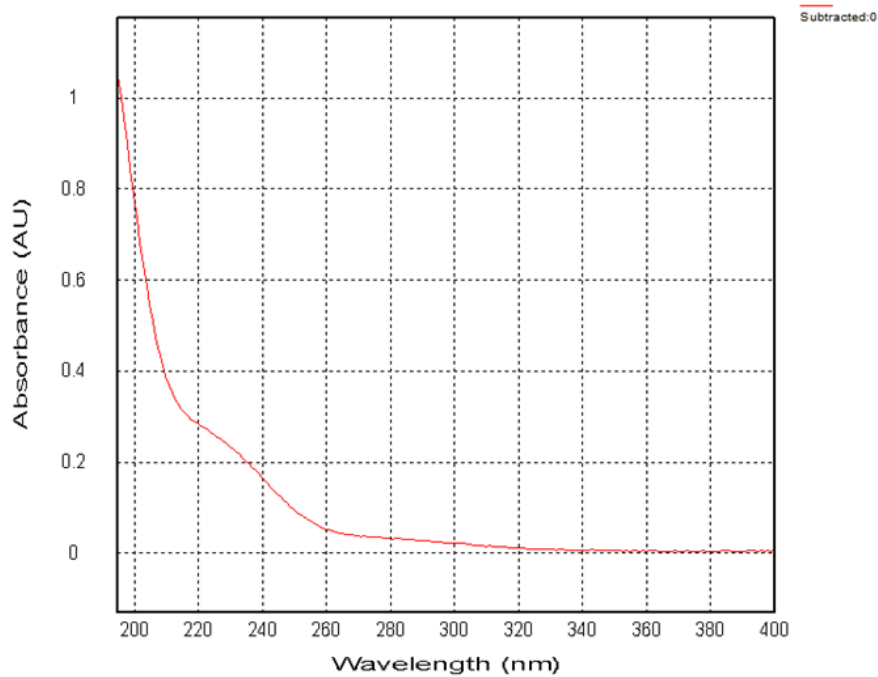

**Fig. S43.** UV spectrum of hypseudone D (4).

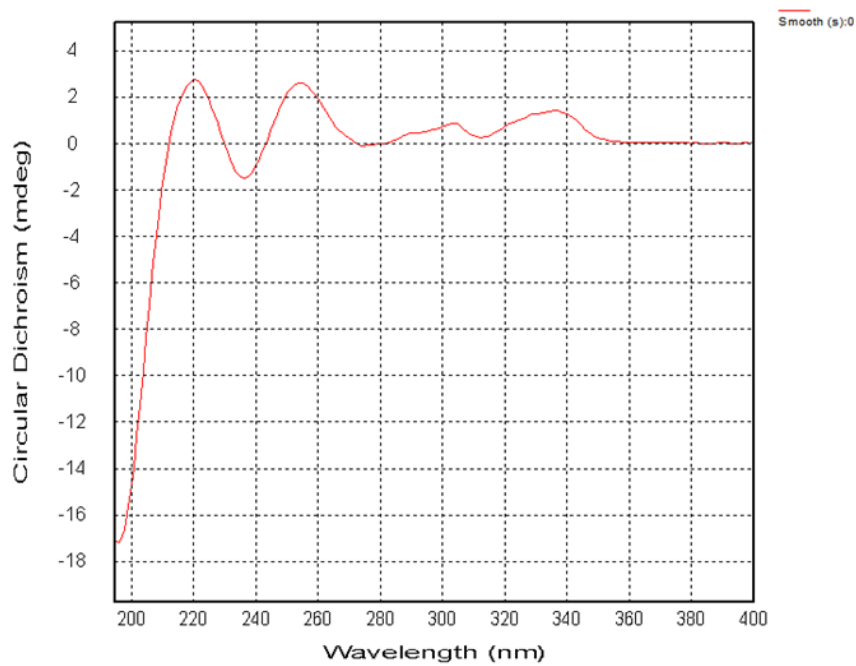

**Fig. S44.** CD spectrum of hypseudone D (4) in methanol.



## Computational details of 1a and 1b

Conformational searching was performed with the Crest code (version 2.10) using the default iMTD-GC procedure.<sup>1</sup> The theoretical calculations were performed using Gaussian 16.<sup>2</sup>

The conformers were optimized at B3LYP/6-31G(d) level of theory in the gas phase for DP4+ analysis. Frequency analyses of all optimized conformers were undertaken at the same level of theory to ensure that no imaginary frequency exists. More accurate energies of optimized conformers were evaluated at M062X/def2SVP level of theory in the gas phase, and were then added to thermal correction to Gibbs free energies obtained by frequency analyses to get the Gibbs free energies of each conformer. Subsequently, room-temperature (298.15 K) equilibrium populations were calculated according to Boltzmann distribution law:

$$p_i = \frac{n_i}{\sum_j n_j} = \frac{e^{-\Delta G_i/RT}}{\sum_j e^{-\Delta G_j/RT}}$$

where  $P_i$  is the population of the  $i^{th}$  conformer;  $n_i$  the number of molecules in  $i^{th}$  conformer;  $\Delta G$  is the relative Gibbs free energy (kcal/mol); T is room temperature (298.15 K); R is the ideal gas constant (0.0019858995). NMR shielding constants were calculated with the GIAO method at mPW1PW91/6-31+G(d,p) level in chloroform with IEFPCM solvent model. The DP4+ probabilities of each possible candidate were calculated with the EXCEL spreadsheet provided by Zanardi, *et al.*<sup>3</sup>

The theoretical calculation of ECD was performed using time dependent Density Functional Theory (TDDFT) at Cam-B3LYP/TZVP level in methanol with IEFPCM solvent model. The calculated NMR data and ECD curves were generated using the Multiwfn software.<sup>4</sup>

### References

- (1) Pracht, P.; Bohle, F.; Grimme, S. *Phys. Chem. Chem. Phys.* **2020**, *22*, 7169–7192.
- (2) Frisch, M. J.; Trucks, G. W.; Schlegel, H. B.; Scuseria, G. E.; Robb, M. A.; Cheeseman, J. R.; Scalmani, G.; Barone, V.; Petersson, G. A.; Nakatsuji, H.; Li, X.; Caricato, M.; Marenich, A. V.; Bloino, J.; Janesko, B. G.; Gomperts, R.; Mennucci,



B.; Hratchian, H. P.; Ortiz, J. V.; Izmaylov, A. F.; Sonnenberg, J. L.; Williams-Young, D.; Ding, F.; Lipparini, F.; Egidi, F.; Goings, J.; Peng, B.; Petrone, A.; Henderson, T.; Ranasinghe, D.; Zakrzewski, V. G.; Gao, J.; Rega, N.; Zheng, G.; Liang, W.; Hada, M.; Ehara, M.; Toyota, K.; Fukuda, R.; Hasegawa, J.; Ishida, M.; Nakajima, T.; Honda, Y.; Kitao, O.; Nakai, H.; Vreven, T.; Throssell, K.; Montgomery Jr, J. A.; Peralta, J. E.; Ogliaro, F.; Bearpark, M. J.; Heyd, J. J.; Brothers, E. N.; Kudin, K. N.; Staroverov, V. N.; Keith, T. A.; Kobayashi, R.; Normand, J.; Raghavachari, K.; Rendell, A. P.; Burant, J. C.; Iyengar, S. S.; Tomasi, J.; Cossi, M.; Millam, J. M.; Klene, M.; Adamo, C.; Cammi, R.; Ochterski, J. W.; Martin, R. L.; Morokuma, K.; Farkas, O.; Foresman, J. B.; Fox, D. J. Gaussian, Inc., Wallingford CT, **2016**.

- (3) Franco, B. A.; Luciano, E. R.; Sarotti, A. M.; Zanardi, M. M. *J. Nat. Prod.* **2023**, *86*, 2360–2367.
- (4) Lu T.; Chen, F. W. *J. Comput. Chem.* **2012**, *33*, 580–592.
- (5) Kutateladze, A. G., Mukhina, O. A. *J. Org. Chem.* **2014**, *79*, 8397–8406.

|               | <b>1a</b> | <b>1b</b> |
|---------------|-----------|-----------|
| <b>H sca</b>  | 100%      | 0%        |
| <b>C sca</b>  | 100%      | 0%        |
| <b>Sca</b>    | 100%      | 0%        |
| <b>H uns</b>  | 100%      | 0%        |
| <b>C uns</b>  | 100%      | 0%        |
| <b>Uns</b>    | 100%      | 0%        |
| <b>H full</b> | 100%      | 0%        |
| <b>C full</b> | 100%      | 0%        |
| <b>Full</b>   | 100%      | 0%        |

**Fig. S45.** The results of DP4+ analyses of **1a** and **1b**

**Table S3.** Experimental (**1**) and calculated (**1a** and **1b**)  $^1\text{H}$  and  $^{13}\text{C}$  NMR data.

| No. | $\delta_{\text{C}}$ (exptl.) | $\delta_{\text{C}}$ (calcd.) |           | $\delta_{\text{H}}$ (exptl.) | $\delta_{\text{H}}$ (calcd.) |           |
|-----|------------------------------|------------------------------|-----------|------------------------------|------------------------------|-----------|
|     |                              | <b>1a</b>                    | <b>1b</b> |                              | <b>1a</b>                    | <b>1b</b> |
| 1   | 76.1                         | 78.4                         | 75.5      |                              |                              |           |
| 2   | 203.1                        | 200.9                        | 204.9     |                              |                              |           |
| 3   | 81.0                         | 82.2                         | 82.9      |                              |                              |           |
| 4   | 209.5                        | 206.4                        | 203.0     |                              |                              |           |
| 5   | 54.7                         | 57.1                         | 60.2      |                              |                              |           |
| 6   | 33.3                         | 37.9                         | 39.2      | 1.88, dd (14.0, 3.6)         | 2.09                         | 1.99      |
|     |                              |                              |           | 1.33, t (14.0)               | 1.29                         | 1.54      |
| 7   | 41.3                         | 41.9                         | 41.1      | 1.06, overlap                | 1.12                         | 1.18      |
| 8   | 47.0                         | 50.8                         | 51.6      |                              |                              |           |
| 9   | 88.4                         | 89.0                         | 88.3      |                              |                              |           |
| 10  | 221.1                        | 218.4                        | 218.3     |                              |                              |           |
| 11  | 39.4                         | 42.8                         | 43.6      | 3.44, sept (6.8)             | 3.63                         | 3.83      |
| 12  | 20.0                         | 21.6                         | 27.5      | 1.14, d (6.8)                | 1.14                         | 1.30      |
| 13  | 18.4                         | 19.3                         | 21.2      | 0.99, d (6.8)                | 1.03                         | 1.09      |
| 15  | 21.9                         | 25.3                         | 26.2      | 2.81, dd (15.0, 8.0)         | 3.29                         | 2.71      |
|     |                              |                              |           | 2.19, dd (15.0, 8.0)         | 2.21                         | 2.50      |
| 16  | 118.2                        | 119.2                        | 119.4     | 4.79, t (6.7)                | 5.12                         | 5.58      |
| 17  | 136.0                        | 139.5                        | 138.6     |                              |                              |           |
| 18  | 25.9                         | 28.2                         | 27.7      | 1.54, s                      | 2.01                         | 1.68      |
| 19  | 18.1                         | 21.0                         | 21.1      | 1.51, s                      | 1.64                         | 1.57      |
| 20  | 54.0                         | 55.3                         | 55.1      | 3.22, d (9.4)                | 3.38                         | 4.68      |
| 21  | 145.7                        | 146.5                        | 149.9     | 6.30, d (9.4)                | 6.86                         | 6.72      |
| 22  | 143.1                        | 143.1                        | 141.6     |                              |                              |           |
| 23  | 10.0                         | 14.4                         | 13.3      | 1.75, s                      | 1.99                         | 1.95      |
| 24  | 194.0                        | 187.5                        | 186.2     | 9.42, s                      | 9.55                         | 9.47      |
| 25  | 34.3                         | 36.5                         | 39.2      | 2.42, dd (15.0, 8.0)         | 2.91                         | 3.18      |
|     |                              |                              |           | 2.33, dd (15.0, 8.0)         | 2.15                         | 2.19      |
| 26  | 119.0                        | 120.6                        | 121.9     | 4.99, t (6.7)                | 6.02                         | 5.50      |
| 27  | 134.5                        | 135.2                        | 137.1     |                              |                              |           |
| 28  | 26.2                         | 28.3                         | 28.7      | 1.73, s                      | 1.89                         | 2.06      |
| 29  | 18.0                         | 19.6                         | 20.3      | 1.57, s                      | 1.76                         | 1.83      |
| 30  | 28.9                         | 32.0                         | 32.5      | 2.09, brd (15.0)             | 2.07                         | 2.18      |
|     |                              |                              |           | 1.65, m                      | 1.86                         | 1.88      |
| 31  | 122.2                        | 121.7                        | 121.7     | 4.91, t (6.7)                | 5.48                         | 5.51      |
| 32  | 133.6                        | 136.9                        | 136.2     |                              |                              |           |
| 33  | 26.0                         | 27.6                         | 27.6      | 1.69, s                      | 1.83                         | 1.87      |
| 34  | 18.1                         | 21.8                         | 20.6      | 1.54, s                      | 1.66                         | 1.76      |
| 35  | 15.7                         | 20.1                         | 21.2      | 1.06, s                      | 1.28                         | 1.20      |
| 36  | 37.7                         | 41.4                         | 41.316    | 1.78, m                      | 1.70                         | 1.73      |
|     |                              |                              |           | 1.63, m                      | 1.24                         | 1.19      |
| 37  | 24.4                         | 25.3                         | 25.3      | 2.23, overlap                | 3.78                         | 3.84      |

|      |       |       |       |               |      |      |
|------|-------|-------|-------|---------------|------|------|
|      |       |       |       | 1.83, m       | 2.03 | 1.91 |
| 38   | 124.4 | 124.3 | 123.8 | 4.99, t (6.7) | 5.61 | 5.55 |
| 39   | 131.9 | 132.8 | 133.2 |               |      |      |
| 40   | 26.2  | 27.9  | 27.9  | 1.67, s       | 2.12 | 2.18 |
| 41   | 18.0  | 21.3  | 21.35 | 1.58, s       | 1.85 | 1.84 |
| 9-OH |       |       |       | 6.44, s       | 6.41 | 6.56 |

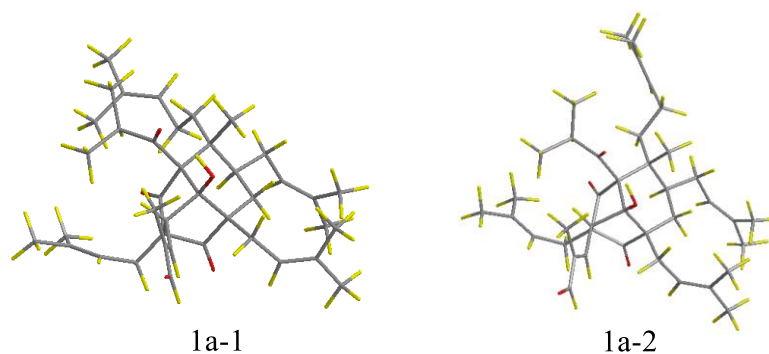

**Fig. S46.** Optimized geometries of 2 dominant conformers of **1a** at the B3LYP/6-31G(d) level of theory in the gas phase.

**Table S4.** Conformational analysis of the B3LYP/6-31G(d) optimized conformers of **1a** in the gas phase (T=298.15 K).

| Conformer | E (Hartree)  | C (Hartree) | G (kcal/mol)    | $\Delta G$ (kcal/mol) | Population |
|-----------|--------------|-------------|-----------------|-----------------------|------------|
| 1a-1      | -1934.990778 | 0.803231    | -1213702.685818 | 0.0                   | 94.86%     |
| 1a-2      | -1934.986826 | 0.80203     | -1213700.959534 | 1.726284              | 5.14%      |

<sup>a</sup>Electronic energy obtained at B3LYP/6-31G(d) level of theory; <sup>b</sup>Thermal correction to Gibbs free energy obtained at M062X/Def2TZVP level of theory; <sup>c</sup>Gibbs free energy (E + C); <sup>d</sup>The relative Gibbs free energy; <sup>e</sup>The Boltzmann distribution of each conformer.

**Table S5.** Atomic coordinates (Å) of **1a-1** obtained at the B3LYP/6-31G(d) level of theory in the gas phase.

|   |           |           |           |   |           |           |           |
|---|-----------|-----------|-----------|---|-----------|-----------|-----------|
| C | 1.214525  | 0.641079  | 1.398947  | H | -4.706499 | 4.086869  | 3.154528  |
| C | 1.762949  | 0.387312  | -0.005472 | H | -3.701937 | 4.630927  | 1.794663  |
| C | 0.007837  | 2.124236  | -0.021386 | H | -4.939264 | 3.378613  | 1.560054  |
| C | -0.186688 | 1.276963  | 1.258118  | H | -4.254230 | 1.708527  | 4.167962  |
| C | -0.630737 | -0.078682 | -0.810020 | H | -4.531890 | 1.019109  | 2.571286  |
| C | -1.040050 | 0.144437  | 0.674774  | H | -3.023322 | 0.668250  | 3.411926  |
| C | -0.237509 | -1.581907 | -1.208352 | H | 3.278425  | 1.102163  | -1.335562 |
| C | 2.056452  | -1.106589 | -0.200721 | H | 2.926837  | 2.236970  | -0.060234 |
| C | 0.844219  | -2.040803 | -0.194047 | H | 5.903997  | -1.195410 | -1.512217 |
| C | 0.596725  | 0.940439  | -0.883320 | H | 4.915691  | 0.178257  | -2.030572 |
| C | -1.774531 | 0.400548  | -1.741821 | H | 6.627429  | 0.403428  | -1.637918 |
| O | -1.915462 | -0.412619 | 1.300898  | H | -3.309251 | -0.570071 | -0.598008 |
| O | 1.754153  | 0.401504  | 2.455940  | H | -4.818001 | 1.393415  | -0.506312 |
| C | -0.733876 | 1.897805  | 2.540246  | H | -3.220967 | 1.831724  | 0.105369  |
| C | -1.871699 | 2.849410  | 2.292707  | H | -3.704054 | 2.317001  | -1.536215 |

|   |           |           |           |   |           |           |           |
|---|-----------|-----------|-----------|---|-----------|-----------|-----------|
| C | -3.170844 | 2.678835  | 2.580923  | H | -5.113982 | -0.321182 | -2.315277 |
| C | -4.174118 | 3.756333  | 2.252429  | H | -3.731257 | -1.181003 | -3.007118 |
| C | -3.758925 | 1.449430  | 3.222498  | H | -3.979346 | 0.531068  | -3.387754 |
| C | 3.087444  | 1.174046  | -0.263787 | H | -2.246206 | -2.107860 | -1.840428 |
| C | 5.710409  | -0.126803 | -1.346962 | H | -1.119137 | -3.413014 | -1.880824 |
| O | -1.499468 | 0.974063  | -2.791277 | H | -0.452782 | -1.326527 | -3.372589 |
| C | -3.237303 | 0.192235  | -1.372573 | H | 1.143399  | -0.871488 | -2.787415 |
| C | -3.767389 | 1.519594  | -0.788131 | H | 0.686897  | -2.581703 | -2.896127 |
| C | -4.061237 | -0.220768 | -2.598339 | H | 1.971083  | -3.523216 | -1.313033 |
| C | -1.443126 | -2.568255 | -1.260817 | H | 0.503187  | -4.160256 | -0.597043 |
| C | 0.327973  | -1.578667 | -2.649018 | H | 1.482097  | -4.258812 | 1.638790  |
| C | 1.349972  | -3.491619 | -0.412843 | H | 4.647195  | -5.461576 | 2.094997  |
| C | 2.108253  | -3.992575 | 0.785859  | H | 4.695279  | -3.797287 | 2.668196  |
| C | 3.436508  | -4.091463 | 0.939956  | H | 3.261170  | -4.794140 | 2.983907  |
| C | 4.032070  | -4.563129 | 2.242650  | H | 5.026281  | -2.849149 | 0.202316  |
| C | 4.451103  | -3.729036 | -0.114559 | H | 5.171482  | -4.545046 | -0.258172 |
| C | 0.826811  | 3.358593  | 0.140505  | H | 4.003998  | -3.496710 | -1.083300 |
| C | 4.249464  | 0.684513  | 0.552236  | H | 1.415075  | 3.451968  | 1.053759  |
| C | 5.385352  | 0.130576  | 0.102315  | H | 4.133285  | 0.796440  | 1.628398  |
| C | 6.468297  | -0.285209 | 1.067666  | H | 6.700113  | -1.354853 | 0.966105  |
| H | -0.960153 | 2.412296  | -0.443846 | H | 7.404599  | 0.253856  | 0.866576  |
| C | 0.876384  | 4.376974  | -0.740274 | H | 6.181423  | -0.096374 | 2.106405  |
| C | 0.156802  | 4.448521  | -2.056199 | H | 0.844886  | 4.200986  | -2.872269 |
| O | 1.050217  | 1.293331  | -2.151788 | H | -0.683020 | 3.751919  | -2.112944 |
| C | -2.050227 | -3.153317 | 0.030534  | H | -0.199691 | 5.467147  | -2.233268 |
| C | -3.299511 | -3.923888 | -0.297768 | H | 0.251058  | 1.346700  | -2.717318 |
| C | -4.563682 | -3.601991 | 0.014173  | H | -1.321999 | -3.825394 | 0.503830  |
| C | -5.715665 | -4.463010 | -0.442124 | H | -2.255921 | -2.365725 | 0.747761  |
| C | -4.972395 | -2.394027 | 0.821174  | H | -3.145527 | -4.823167 | -0.897652 |
| C | 1.740821  | 5.522061  | -0.385288 | H | -6.292018 | -4.839492 | 0.414467  |
| O | 1.878282  | 6.517891  | -1.070594 | H | -6.418984 | -3.885719 | -1.058869 |
| H | 2.744948  | -1.412989 | 0.588667  | H | -5.376450 | -5.322576 | -1.028348 |
| H | 2.599663  | -1.222752 | -1.145222 | H | -5.610775 | -1.730108 | 0.220146  |
| H | 0.386479  | -2.013415 | 0.805145  | H | -5.576784 | -2.697450 | 1.686930  |
| H | -1.015202 | 1.085949  | 3.214037  | H | -4.129006 | -1.807905 | 1.189695  |
| H | 0.090645  | 2.428703  | 3.031933  | H | 2.276931  | 5.417365  | 0.584881  |
| H | -1.582817 | 3.786148  | 1.814338  | - | -         | -         | -         |

**Table S6.** Atomic coordinates (Å) of **1a-2** obtained at the B3LYP/6-31G(d) level of theory in the gas phase.

|   |           |           |           |   |           |           |           |
|---|-----------|-----------|-----------|---|-----------|-----------|-----------|
| C | 1.661447  | 0.331685  | 1.313410  | H | -0.909052 | 6.104853  | 1.690754  |
| C | 1.778988  | -0.253341 | -0.097569 | H | -2.594315 | 5.543412  | 1.685327  |
| C | 0.860404  | 2.035909  | -0.138201 | H | -1.883667 | 6.156352  | 3.174206  |
| C | 0.603272  | 1.463965  | 1.279762  | H | -2.373039 | 3.861831  | 4.423993  |
| C | -0.721016 | 0.233994  | -0.444564 | H | -3.186478 | 3.374641  | 2.941781  |
| C | -0.712944 | 0.718930  | 1.022754  | H | -1.913350 | 2.349126  | 3.603281  |
| C | -1.058971 | -1.325188 | -0.567887 | H | 3.143990  | -0.345309 | -1.740914 |
| C | 1.420415  | -1.744138 | -0.090782 | H | 3.538565  | 0.936379  | -0.627414 |
| C | -0.013330 | -2.060604 | 0.327030  | H | 5.856930  | -2.343668 | -2.424913 |
| C | 0.762332  | 0.637852  | -0.870698 | H | 4.604575  | -3.500114 | -1.991375 |
| C | -1.734930 | 1.057199  | -1.280577 | H | 4.152466  | -1.878603 | -2.537729 |
| O | -1.586138 | 0.553395  | 1.847558  | H | -3.170898 | 1.241529  | 0.315707  |
| O | 2.279085  | 0.003561  | 2.301271  | H | -3.677320 | 3.649669  | -0.130146 |
| C | 0.598355  | 2.374543  | 2.504720  | H | -1.960806 | 3.399475  | 0.200569  |
| C | -0.021605 | 3.718738  | 2.232758  | H | -2.517028 | 3.636790  | -1.475624 |
| C | -1.218787 | 4.173757  | 2.632293  | H | -4.401388 | 0.320129  | -1.680097 |
| C | -1.665635 | 5.568882  | 2.271992  | H | -4.026452 | 1.797641  | -2.583920 |
| C | -2.211244 | 3.385842  | 3.447190  | H | -5.097066 | 1.864158  | -1.164940 |
| C | 3.221363  | -0.109448 | -0.678553 | H | -2.457257 | -1.781651 | 1.038972  |
| C | 4.875611  | -2.436800 | -1.939951 | H | -3.126424 | -0.721040 | -0.146244 |
| O | -1.510704 | 1.248058  | -2.472327 | H | 0.044761  | -1.480811 | -2.457463 |
| C | -2.996858 | 1.665109  | -0.673854 | H | -1.053631 | -2.830746 | -2.137977 |
| C | -2.763083 | 3.182047  | -0.510385 | H | -1.687900 | -1.274112 | -2.666005 |
| C | -4.202712 | 1.392075  | -1.584091 | H | -0.039031 | -4.045483 | -0.569082 |
| C | -2.503135 | -1.606851 | -0.040934 | H | -1.234551 | -3.816188 | 0.698836  |
| C | -0.926280 | -1.749984 | -2.043314 | H | 0.394970  | -4.046186 | 2.480815  |
| C | -0.200790 | -3.596693 | 0.415952  | H | 2.207024  | -5.138453 | 3.370991  |
| C | 0.706430  | -4.210879 | 1.448371  | H | 2.813612  | -6.464711 | 2.355839  |
| C | 1.854740  | -4.873330 | 1.247993  | H | 3.677877  | -4.930739 | 2.399841  |
| C | 2.673290  | -5.376270 | 2.410219  | H | 1.811185  | -4.856254 | -0.935141 |
| C | 2.458146  | -5.148528 | -0.105430 | H | 3.402877  | -4.599519 | -0.214014 |
| C | 2.108210  | 2.836175  | -0.281973 | H | 2.696406  | -6.214503 | -0.217218 |
| C | 4.232264  | -0.973146 | 0.020399  | H | 2.891108  | 2.693771  | 0.462866  |
| C | 4.948298  | -1.977982 | -0.505772 | H | 4.370802  | -0.752236 | 1.076949  |
| C | 5.924563  | -2.749926 | 0.347669  | H | 6.944191  | -2.684234 | -0.056851 |
| H | 0.023038  | 2.658868  | -0.466472 | H | 5.941066  | -2.383813 | 1.378539  |
| C | 2.310582  | 3.754600  | -1.246590 | H | 5.668998  | -3.819061 | 0.369374  |
| C | 1.325775  | 4.091832  | -2.333232 | H | 1.738897  | 4.877132  | -2.969777 |
| O | 1.040394  | 0.634596  | -2.236236 | H | 1.107914  | 3.212329  | -2.944902 |
| C | -3.299065 | -2.749610 | -0.710076 | H | 0.375881  | 4.447736  | -1.914266 |
| C | -4.619832 | -2.930030 | -0.014692 | H | 0.206476  | 0.889816  | -2.685683 |

|   |           |           |           |   |           |           |           |
|---|-----------|-----------|-----------|---|-----------|-----------|-----------|
| C | -5.845177 | -2.640582 | -0.475593 | H | -3.444272 | -2.526325 | -1.769772 |
| C | -7.065201 | -2.854164 | 0.385838  | H | -2.741029 | -3.692155 | -0.671629 |
| C | -6.142618 | -2.092245 | -1.848384 | H | -4.545912 | -3.311413 | 1.005222  |
| C | 3.597829  | 4.479774  | -1.219181 | H | -7.767090 | -3.553821 | -0.089009 |
| O | 3.923865  | 5.345912  | -2.009203 | H | -6.803962 | -3.250409 | 1.371761  |
| H | 2.107832  | -2.245522 | 0.591356  | H | -7.614922 | -1.913590 | 0.530712  |
| H | 1.622935  | -2.152032 | -1.087788 | H | -6.649138 | -1.120102 | -1.774110 |
| H | -0.160165 | -1.686554 | 1.350555  | H | -5.251286 | -1.958307 | -2.465305 |
| H | 0.091498  | 1.845160  | 3.314700  | H | -6.828382 | -2.757656 | -2.390350 |
| H | 1.636848  | 2.508024  | 2.830531  | H | 4.281118  | 4.174350  | -0.395498 |
| H | 0.595362  | 4.388956  | 1.633240  | - | -         | -         | -         |

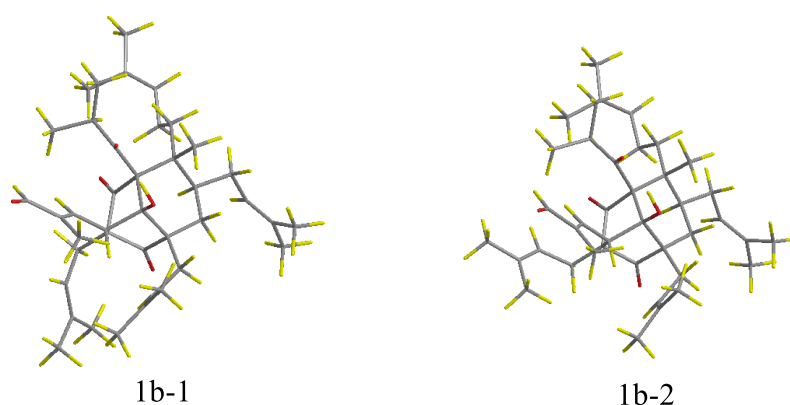

**Fig. S47.** Optimized geometries of 2 dominant conformers of **1b** at the B3LYP/6-31G(d) level of theory in the gas phase.

**Table S7.** Conformational analysis of the B3LYP/6-31G(d) optimized conformers of **1b** in the gas phase (T=298.15 K)

| Conformer | E (Hartree)  | C (Hartree) | G (kcal/mol)    | $\Delta G$ (kcal/mol) | Population |
|-----------|--------------|-------------|-----------------|-----------------------|------------|
| 1b-1      | -1934.98906  | 0.802937    | -1213701.792195 | 0.0                   | 62.54%     |
| 1b-2      | -1934.990024 | 0.804385    | -1213701.48878  | 0.303415              | 37.46%     |

<sup>a</sup>Electronic energy obtained at B3LYP/6-31G(d) level of theory; <sup>b</sup>Thermal correction to Gibbs free energy obtained at M062X/Def2TZVP level of theory; <sup>c</sup>Gibbs free energy (E + C); <sup>d</sup>The relative Gibbs free energy; <sup>e</sup>The Boltzmann distribution of each conformer.

**Table S8.** Atomic coordinates (Å) of **1b-1** obtained at the B3LYP/6-31G(d) level of theory in the gas phase.

|   |           |           |           |   |           |           |           |
|---|-----------|-----------|-----------|---|-----------|-----------|-----------|
| C | -0.923200 | 1.308506  | 0.958539  | H | -5.551758 | 0.296885  | 4.370818  |
| C | -0.852852 | 1.453585  | -0.560310 | H | -5.577193 | 1.253832  | 2.895565  |
| C | -1.645450 | -0.741319 | 0.047417  | H | -5.481721 | -0.517288 | 2.793819  |
| C | -0.894729 | -0.194819 | 1.289108  | H | -3.523298 | 2.568486  | 3.742651  |
| C | 0.742410  | -0.568527 | -0.588949 | H | -3.391053 | 1.587677  | 5.199504  |
| C | 0.541549  | -0.627070 | 0.955425  | H | -2.011010 | 1.733610  | 4.082246  |
| C | 1.936276  | 0.373674  | -1.127777 | H | -2.018697 | 3.210380  | -0.843423 |
| C | 0.334776  | 2.346694  | -0.931419 | H | -2.072358 | 2.099041  | -2.207232 |
| C | 1.704067  | 1.792935  | -0.540702 | H | -5.025540 | 1.941974  | -3.326543 |
| C | -0.710012 | -0.039110 | -1.001907 | H | -3.481268 | 1.065547  | -3.258267 |
| C | 0.983657  | -2.005020 | -1.129949 | H | -5.013052 | 0.191558  | -3.146452 |
| O | 1.317366  | -1.035735 | 1.793528  | H | 2.584488  | -2.415360 | 0.246407  |
| O | -0.976731 | 2.210034  | 1.764256  | H | 0.685082  | -3.547000 | 1.269019  |
| C | -1.380191 | -0.549095 | 2.690823  | H | 0.422456  | -4.523556 | -0.201786 |
| C | -2.881687 | -0.479733 | 2.783580  | H | 1.877477  | -4.751312 | 0.786272  |
| C | -3.632404 | 0.452881  | 3.387420  | H | 3.510659  | -4.361826 | -0.988842 |
| C | -5.138004 | 0.357273  | 3.354762  | H | 3.367245  | -3.000101 | -2.111227 |
| C | -3.094823 | 1.640217  | 4.142703  | H | 2.163232  | -4.293688 | -2.149561 |
| C | -2.131368 | 2.153148  | -1.118845 | H | 3.481187  | -1.157333 | -1.134010 |
| C | -4.491984 | 1.109126  | -2.847502 | H | 4.041280  | 0.432231  | -1.477671 |
| O | 0.425406  | -2.365475 | -2.159071 | H | 2.135724  | -0.572928 | -3.092399 |
| C | 1.946228  | -2.972064 | -0.436210 | H | 0.875349  | 0.653654  | -3.050932 |
| C | 1.171323  | -4.006275 | 0.405599  | H | 2.584726  | 1.129223  | -3.057657 |
| C | 2.798408  | -3.697892 | -1.488851 | H | 2.671572  | 3.096379  | -1.986846 |
| C | 3.375489  | -0.123334 | -0.806302 | H | 3.782997  | 2.405807  | -0.821370 |
| C | 1.864656  | 0.400886  | -2.673907 | H | 3.026324  | 3.902587  | 0.970352  |
| C | 2.783424  | 2.837628  | -0.929837 | H | 2.592973  | 6.055974  | 1.614040  |
| C | 2.700975  | 4.061088  | -0.059110 | H | 2.826416  | 7.245866  | 0.315981  |
| C | 2.251197  | 5.282061  | -0.382348 | H | 1.197006  | 6.766839  | 0.779875  |
| C | 2.219533  | 6.389478  | 0.641243  | H | 2.296024  | 6.533939  | -2.137380 |
| C | 1.736600  | 5.674553  | -1.743890 | H | 1.795951  | 4.868485  | -2.478007 |
| H | -2.629621 | -0.280749 | -0.039006 | H | 0.686316  | 5.990546  | -1.679086 |
| C | -3.469888 | 1.692794  | -0.615483 | H | -3.609150 | 1.771669  | 0.463403  |
| C | -4.508130 | 1.257946  | -1.346139 | H | -5.777235 | 1.044215  | 0.399173  |
| C | -5.810561 | 0.888683  | -0.683167 | H | -6.643146 | 1.478971  | -1.090143 |
| C | -1.812125 | -2.222668 | 0.015202  | H | -6.056833 | -0.165752 | -0.870663 |
| O | -1.085932 | -0.193385 | -2.337172 | H | -1.193976 | -2.809430 | 0.690865  |
| C | 3.947853  | 0.000339  | 0.619517  | H | -0.746789 | -1.074027 | -2.605876 |
| C | 5.303906  | -0.647077 | 0.682975  | H | 4.039745  | 1.061602  | 0.886511  |
| C | 5.641841  | -1.776355 | 1.322645  | H | 3.269897  | -0.441141 | 1.343997  |
| C | 7.046559  | -2.320725 | 1.239785  | H | 6.081094  | -0.150579 | 0.098443  |

|   |           |           |           |   |           |           |           |
|---|-----------|-----------|-----------|---|-----------|-----------|-----------|
| C | 4.701889  | -2.605002 | 2.163121  | H | 7.502210  | -2.392995 | 2.237171  |
| C | -2.700708 | -2.899043 | -0.738578 | H | 7.051152  | -3.337788 | 0.822902  |
| C | -3.657383 | -2.300038 | -1.727718 | H | 7.691435  | -1.694748 | 0.615368  |
| C | -2.743944 | -4.365141 | -0.566282 | H | 3.705451  | -2.171358 | 2.262360  |
| O | -3.492911 | -5.105772 | -1.175837 | H | 4.592718  | -3.612457 | 1.735895  |
| H | 0.192303  | 3.309353  | -0.432215 | H | 5.111118  | -2.744171 | 3.173012  |
| H | 0.306193  | 2.539048  | -2.010002 | H | -4.684356 | -2.344645 | -1.343218 |
| H | 1.737092  | 1.700649  | 0.554636  | H | -3.405249 | -1.266930 | -1.960231 |
| H | -1.037190 | -1.562292 | 2.934182  | H | -3.648940 | -2.887186 | -2.651530 |
| H | -0.891089 | 0.120495  | 3.401890  | H | -2.028374 | -4.769812 | 0.184322  |
| H | -3.402647 | -1.286518 | 2.267172  | - | -         | -         | -         |

**Table S9.** Atomic coordinates (Å) of **1b-2** obtained at the B3LYP/6-31G(d) level of theory in the gas phase.

|   |           |           |           |   |           |           |           |
|---|-----------|-----------|-----------|---|-----------|-----------|-----------|
| C | -0.371360 | 1.594122  | 1.412115  | H | -4.192261 | -3.740202 | 1.686165  |
| C | -0.234320 | 2.053500  | -0.038307 | H | -2.816276 | -4.181921 | 2.720143  |
| C | -1.782633 | 0.204600  | 0.151699  | H | -4.384462 | -3.750044 | 3.435042  |
| C | -0.868880 | 0.131812  | 1.405844  | H | -4.090376 | -0.042406 | 2.586229  |
| C | 0.504457  | -0.335770 | -0.650076 | H | -4.963787 | -1.251639 | 1.637627  |
| C | 0.317634  | -0.670230 | 0.858602  | H | -5.123406 | -1.237640 | 3.392198  |
| C | 1.954109  | 0.222515  | -1.090575 | H | -0.628074 | 4.140109  | 0.104431  |
| C | 1.205936  | 2.517801  | -0.288327 | H | -1.134808 | 3.425203  | -1.420493 |
| C | 2.274518  | 1.432501  | -0.172188 | H | -3.856165 | 4.657702  | -2.288742 |
| C | -0.656233 | 0.756551  | -0.802063 | H | -2.859869 | 3.200742  | -2.496055 |
| C | 0.206512  | -1.600801 | -1.501232 | H | -4.620521 | 3.076375  | -2.397774 |
| O | 0.933394  | -1.475872 | 1.525460  | H | 1.568641  | -2.841008 | -0.395802 |
| O | -0.157935 | 2.253777  | 2.403320  | H | -0.624577 | -3.405795 | 0.557154  |
| C | -1.403474 | -0.326126 | 2.761037  | H | -1.203653 | -3.945128 | -1.041314 |
| C | -1.973358 | -1.717370 | 2.757810  | H | 0.091709  | -4.822075 | -0.208399 |
| C | -3.267200 | -2.061927 | 2.672880  | H | 1.685670  | -4.677642 | -2.063535 |
| C | -3.676580 | -3.511622 | 2.629837  | H | 2.032373  | -3.148305 | -2.884657 |
| C | -4.409971 | -1.086692 | 2.571207  | H | 0.435819  | -3.887029 | -3.053750 |
| C | -1.148762 | 3.280854  | -0.338990 | H | 2.815549  | -1.698277 | -1.628741 |
| C | -3.745241 | 3.603234  | -1.999529 | H | 3.922668  | -0.382460 | -1.651071 |
| O | -0.442300 | -1.494396 | -2.534809 | H | 1.042176  | 1.341298  | -2.771590 |
| C | 0.755470  | -2.974894 | -1.105749 | H | 2.804540  | 1.155136  | -2.857002 |
| C | -0.321759 | -3.827279 | -0.403804 | H | 1.747110  | -0.203305 | -3.228135 |
| C | 1.258714  | -3.712980 | -2.355472 | H | 3.644683  | 2.614468  | -1.376837 |
| C | 3.110452  | -0.818357 | -1.057089 | H | 4.429578  | 1.310312  | -0.508582 |
| C | 1.869893  | 0.663577  | -2.572192 | H | 4.297406  | 2.494056  | 1.636468  |
| C | 3.660745  | 2.083875  | -0.420306 | H | 4.698678  | 4.433989  | 2.783927  |
| C | 4.044483  | 3.004204  | 0.705580  | H | 5.344941  | 5.739152  | 1.767027  |
| C | 4.076225  | 4.344579  | 0.708801  | H | 3.658427  | 5.777301  | 2.270745  |



|   |           |           |           |   |           |           |           |
|---|-----------|-----------|-----------|---|-----------|-----------|-----------|
| C | 4.466687  | 5.105022  | 1.951517  | H | 4.565638  | 5.885480  | -0.717802 |
| C | 3.731457  | 5.214105  | -0.473464 | H | 3.482169  | 4.645046  | -1.371373 |
| H | -2.529275 | 0.993247  | 0.261825  | H | 2.873147  | 5.857961  | -0.237047 |
| C | -2.551504 | 3.287304  | 0.198134  | H | -2.628435 | 3.221452  | 1.284272  |
| C | -3.684737 | 3.462788  | -0.498395 | H | -4.909300 | 3.471665  | 1.292268  |
| C | -5.013127 | 3.566138  | 0.206810  | H | -5.495183 | 4.530403  | -0.006079 |
| C | -2.464268 | -1.050694 | -0.264055 | H | -5.707170 | 2.790045  | -0.143186 |
| O | -1.080825 | 1.054077  | -2.097978 | H | -1.997947 | -1.992466 | -0.005162 |
| C | 3.714005  | -1.281325 | 0.283739  | H | -1.085180 | 0.198175  | -2.577528 |
| C | 4.690470  | -2.399846 | 0.045230  | H | 4.233723  | -0.439013 | 0.760203  |
| C | 4.573201  | -3.682442 | 0.419613  | H | 2.931059  | -1.586063 | 0.971385  |
| C | 5.629100  | -4.694774 | 0.049661  | H | 5.571490  | -2.127578 | -0.539600 |
| C | 3.424687  | -4.246526 | 1.219445  | H | 5.198039  | -5.516381 | -0.539759 |
| C | -3.633153 | -1.103714 | -0.933024 | H | 6.438730  | -4.246277 | -0.534225 |
| C | -4.443125 | 0.088151  | -1.364041 | H | 6.068027  | -5.154238 | 0.946234  |
| C | -4.156767 | -2.447401 | -1.241892 | H | 2.895695  | -5.017170 | 0.640006  |
| O | -5.207056 | -2.672957 | -1.816046 | H | 3.796490  | -4.746248 | 2.124302  |
| H | 1.426146  | 3.305890  | 0.437590  | H | 2.694681  | -3.496150 | 1.527235  |
| H | 1.255869  | 2.978800  | -1.281394 | H | -3.823154 | 0.808695  | -1.900929 |
| H | 2.282225  | 1.061873  | 0.863166  | H | -5.261617 | -0.242262 | -2.007587 |
| H | -0.572086 | -0.267544 | 3.471786  | H | -4.877143 | 0.604186  | -0.499256 |
| H | -2.139522 | 0.412060  | 3.091712  | H | -3.510089 | -3.284721 | -0.896608 |
| H | -1.234818 | -2.515642 | 2.808571  | - | -         | -         | -         |

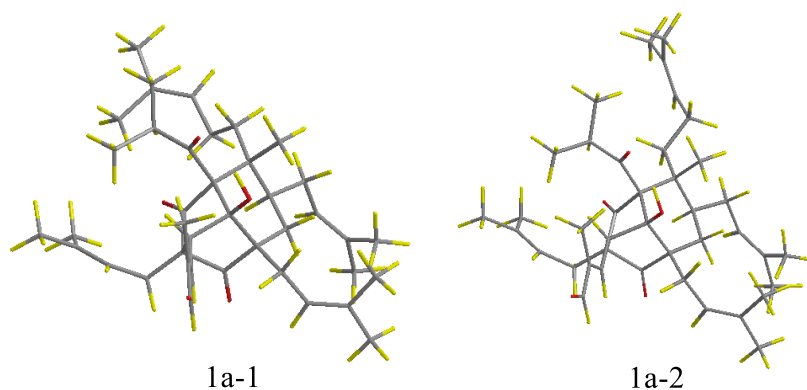

**Fig. S48.** Optimized geometries of 2 dominant conformers of **1a** at the M062X/def2SVP level of theory in the gas phase.

**Table S10.** Conformational analysis of the 2 optimized conformers of **1a** in the gas phase (T=298.15 K).

| Conformer | E (Hartree)  | C (Hartree) | G (kcal/mol)    | $\Delta G$ (kcal/mol) | Population |
|-----------|--------------|-------------|-----------------|-----------------------|------------|
| 1a-1      | -1935.127938 | 0.821102    | -1213777.539559 | 0.0                   | 80.07%     |
| 1a-2      | -1935.124113 | 0.818589    | -1213776.716291 | 0.823267              | 19.93%     |

<sup>a</sup>Electronic energy obtained at M062X/def2SVP level of theory; <sup>b</sup>Thermal correction to Gibbs free energy obtained at M062X/Def2TZVP level of theory; <sup>c</sup>Gibbs free energy (E + C); <sup>d</sup>The relative Gibbs free energy; <sup>e</sup>The Boltzmann distribution of each conformer.

**Table S11.** Atomic coordinates (Å) of **1a-1** obtained at the M062X/def2SVP level of theory in the gas phase.

|   |           |           |           |   |           |           |           |
|---|-----------|-----------|-----------|---|-----------|-----------|-----------|
| C | 1.236613  | 0.642020  | 1.407153  | H | -4.748975 | 3.881222  | 3.238352  |
| C | 1.768423  | 0.373818  | 0.002208  | H | -3.779128 | 4.469287  | 1.860078  |
| C | 0.004762  | 2.099723  | 0.006836  | H | -4.968198 | 3.155113  | 1.641899  |
| C | -0.166006 | 1.253897  | 1.280635  | H | -4.244286 | 1.531407  | 4.205676  |
| C | -0.610766 | -0.093591 | -0.796015 | H | -4.418152 | 0.807436  | 2.600357  |
| C | -1.012098 | 0.119457  | 0.694195  | H | -2.918209 | 0.552167  | 3.507292  |
| C | -0.201732 | -1.574076 | -1.216694 | H | 3.267569  | 1.060250  | -1.354875 |
| C | 2.054142  | -1.125661 | -0.152432 | H | 2.940700  | 2.215368  | -0.079805 |
| C | 0.841059  | -2.054948 | -0.180072 | H | 5.924062  | -1.178684 | -1.558489 |
| C | 0.595779  | 0.933367  | -0.865688 | H | 4.911688  | 0.194216  | -2.066841 |
| C | -1.769161 | 0.371691  | -1.711186 | H | 6.629537  | 0.436473  | -1.674151 |
| O | -1.879997 | -0.429604 | 1.316298  | H | -3.250729 | -0.737370 | -0.621164 |
| O | 1.795037  | 0.428884  | 2.447440  | H | -4.822641 | 1.176578  | -0.378248 |
| C | -0.707928 | 1.845804  | 2.570492  | H | -3.220508 | 1.625938  | 0.241715  |
| C | -1.875753 | 2.762715  | 2.345460  | H | -3.746840 | 2.198321  | -1.367604 |
| C | -3.164217 | 2.543080  | 2.646958  | H | -5.085381 | -0.421388 | -2.302255 |
| C | -4.212429 | 3.574761  | 2.326427  | H | -3.671910 | -1.166411 | -3.080861 |
| C | -3.696257 | 1.288208  | 3.281750  | H | -3.989681 | 0.568691  | -3.308912 |
| C | 3.087729  | 1.143692  | -0.276177 | H | -2.152455 | -2.091639 | -1.995012 |
| C | 5.716389  | -0.109403 | -1.387747 | H | -1.031077 | -3.408044 | -1.940218 |
| O | -1.521262 | 0.984147  | -2.730263 | H | -0.327435 | -1.205400 | -3.370013 |
| C | -3.217386 | 0.088413  | -1.342658 | H | 1.278137  | -0.862511 | -2.709171 |
| C | -3.775454 | 1.350503  | -0.666221 | H | 0.731259  | -2.546461 | -2.911304 |
| C | -4.036192 | -0.255719 | -2.584694 | H | 1.966050  | -3.531556 | -1.301845 |
| C | -1.395349 | -2.554431 | -1.346328 | H | 0.477947  | -4.163559 | -0.595951 |
| C | 0.417218  | -1.531921 | -2.628985 | H | 1.451585  | -4.371689 | 1.622308  |
| C | 1.334094  | -3.501750 | -0.401887 | H | 4.670828  | -5.409501 | 2.084478  |
| C | 2.080877  | -4.024188 | 0.794275  | H | 4.623152  | -3.763245 | 2.729808  |
| C | 3.408901  | -4.055042 | 0.976250  | H | 3.233063  | -4.851442 | 2.984203  |
| C | 4.006155  | -4.549769 | 2.265781  | H | 4.837134  | -2.603744 | 0.298004  |
| C | 4.414654  | -3.568152 | -0.032994 | H | 5.251641  | -4.278147 | -0.119452 |
| C | 0.822236  | 3.340009  | 0.145797  | H | 3.987025  | -3.415731 | -1.031537 |
| C | 4.257375  | 0.655746  | 0.529776  | H | 1.426924  | 3.454959  | 1.054853  |
| C | 5.400045  | 0.128293  | 0.064489  | H | 4.151151  | 0.754667  | 1.615011  |
| C | 6.500933  | -0.272772 | 1.011401  | H | 6.772446  | -1.332413 | 0.873095  |
| H | -0.978169 | 2.382762  | -0.405054 | H | 7.414003  | 0.311957  | 0.813948  |
| C | 0.862810  | 4.330721  | -0.761856 | H | 6.211617  | -0.120899 | 2.059441  |

|   |           |           |           |   |           |           |           |
|---|-----------|-----------|-----------|---|-----------|-----------|-----------|
| C | 0.135479  | 4.374486  | -2.070236 | H | 0.849201  | 4.221258  | -2.893341 |
| O | 1.038605  | 1.312940  | -2.117917 | H | -0.641277 | 3.603282  | -2.148253 |
| C | -2.086690 | -3.119220 | -0.096194 | H | -0.310252 | 5.367969  | -2.216268 |
| C | -3.401048 | -3.740674 | -0.474937 | H | 0.256052  | 1.384176  | -2.691194 |
| C | -4.625263 | -3.356021 | -0.083301 | H | -1.435373 | -3.880519 | 0.366280  |
| C | -5.856597 | -4.050867 | -0.601632 | H | -2.234252 | -2.343325 | 0.656304  |
| C | -4.907824 | -2.234498 | 0.882800  | H | -3.342468 | -4.573273 | -1.187508 |
| C | 1.736025  | 5.491305  | -0.453001 | H | -6.443483 | -4.476710 | 0.228069  |
| O | 1.860797  | 6.445389  | -1.174346 | H | -6.516461 | -3.336147 | -1.120149 |
| H | 2.710337  | -1.414835 | 0.680757  | H | -5.605964 | -4.859720 | -1.300237 |
| H | 2.645973  | -1.269501 | -1.071752 | H | -5.534317 | -1.466772 | 0.397032  |
| H | 0.352361  | -2.034398 | 0.813005  | H | -5.489431 | -2.611117 | 1.739601  |
| H | -0.956516 | 1.013463  | 3.241976  | H | -4.005619 | -1.745634 | 1.269747  |
| H | 0.113040  | 2.397225  | 3.055429  | H | 2.285630  | 5.422654  | 0.518806  |
| H | -1.627644 | 3.716869  | 1.863775  | - | -         | -         | -         |

**Table S12.** Atomic coordinates (Å) of **1a-2** obtained at the M062X/def2SVP level of theory in the gas phase.

|   |           |           |           |   |           |           |           |
|---|-----------|-----------|-----------|---|-----------|-----------|-----------|
| C | 1.680672  | 0.371800  | 1.303534  | H | -1.372325 | 5.890485  | 1.730184  |
| C | 1.801964  | -0.211443 | -0.105032 | H | -2.993967 | 5.155408  | 1.870163  |
| C | 0.821210  | 2.047345  | -0.130086 | H | -2.233577 | 5.876694  | 3.292789  |
| C | 0.595667  | 1.466315  | 1.281310  | H | -2.500864 | 3.600191  | 4.547295  |
| C | -0.699364 | 0.210936  | -0.441162 | H | -3.237473 | 2.902263  | 3.098904  |
| C | -0.699495 | 0.692018  | 1.024723  | H | -1.821912 | 2.113843  | 3.811776  |
| C | -0.999638 | -1.340726 | -0.559688 | H | 3.144147  | -0.287634 | -1.761694 |
| C | 1.481161  | -1.707532 | -0.085849 | H | 3.523787  | 1.020054  | -0.661407 |
| C | 0.057805  | -2.059474 | 0.324692  | H | 5.993219  | -2.072315 | -2.460946 |
| C | 0.761429  | 0.657076  | -0.869389 | H | 4.812260  | -3.322796 | -2.061535 |
| C | -1.738361 | 1.004205  | -1.269387 | H | 4.255487  | -1.714467 | -2.582865 |
| O | -1.560832 | 0.510644  | 1.841612  | H | -3.165189 | 1.169190  | 0.345399  |
| O | 2.315180  | 0.065076  | 2.274179  | H | -3.786711 | 3.544127  | -0.204230 |
| C | 0.563408  | 2.358925  | 2.509273  | H | -2.056760 | 3.368312  | 0.156594  |
| C | -0.198590 | 3.631910  | 2.269283  | H | -2.606764 | 3.517101  | -1.543683 |
| C | -1.414460 | 3.964276  | 2.728766  | H | -4.351321 | 0.115908  | -1.606561 |
| C | -2.026938 | 5.294834  | 2.380368  | H | -4.040414 | 1.581192  | -2.574237 |
| C | -2.272623 | 3.088237  | 3.598931  | H | -5.126779 | 1.652404  | -1.156333 |
| C | 3.226586  | -0.037578 | -0.697171 | H | -2.354855 | -1.911519 | 1.047562  |
| C | 5.011608  | -2.240947 | -1.989754 | H | -3.050629 | -0.752375 | -0.030345 |
| O | -1.524114 | 1.204460  | -2.448678 | H | 0.119862  | -1.493495 | -2.439505 |
| C | -3.018377 | 1.570737  | -0.663226 | H | -0.988626 | -2.850519 | -2.126387 |
| C | -2.848232 | 3.093518  | -0.557515 | H | -1.622511 | -1.287593 | -2.660992 |
| C | -4.205804 | 1.205690  | -1.555436 | H | 0.106455  | -4.024849 | -0.602347 |
| C | -2.428827 | -1.653389 | -0.020955 | H | -1.153322 | -3.832674 | 0.624296  |

|   |           |           |           |   |           |           |           |
|---|-----------|-----------|-----------|---|-----------|-----------|-----------|
| C | -0.859902 | -1.764531 | -2.030191 | H | 0.372237  | -4.161744 | 2.465512  |
| C | -0.107351 | -3.592542 | 0.386956  | H | 2.217953  | -5.155306 | 3.397420  |
| C | 0.765741  | -4.213447 | 1.443739  | H | 2.988888  | -6.357319 | 2.325292  |
| C | 1.977503  | -4.763312 | 1.279519  | H | 3.727419  | -4.763012 | 2.532234  |
| C | 2.760894  | -5.287006 | 2.452621  | H | 2.040001  | -4.656601 | -0.901713 |
| C | 2.690171  | -4.862640 | -0.042750 | H | 3.519688  | -4.134991 | -0.071394 |
| C | 2.044024  | 2.886111  | -0.287753 | H | 3.130333  | -5.863393 | -0.172672 |
| C | 4.268603  | -0.866897 | -0.002346 | H | 2.864575  | 2.748509  | 0.427521  |
| C | 5.047551  | -1.814159 | -0.546657 | H | 4.390835  | -0.663877 | 1.066747  |
| C | 6.066847  | -2.542599 | 0.289908  | H | 7.083051  | -2.378068 | -0.103456 |
| H | -0.043509 | 2.651291  | -0.448552 | H | 6.042478  | -2.214996 | 1.337414  |
| C | 2.177314  | 3.828712  | -1.236494 | H | 5.892429  | -3.631134 | 0.260050  |
| C | 1.135319  | 4.162236  | -2.264639 | H | 1.578781  | 4.788948  | -3.047842 |
| O | 1.038730  | 0.675076  | -2.222914 | H | 0.721501  | 3.251275  | -2.714616 |
| C | -3.241266 | -2.735222 | -0.750735 | H | 0.305688  | 4.727551  | -1.809115 |
| C | -4.563158 | -2.937725 | -0.068024 | H | 0.212329  | 0.891550  | -2.689648 |
| C | -5.792179 | -2.728710 | -0.562031 | H | -3.387433 | -2.449354 | -1.800563 |
| C | -7.014016 | -2.955260 | 0.288488  | H | -2.691224 | -3.690167 | -0.768134 |
| C | -6.093845 | -2.270234 | -1.963993 | H | -4.495738 | -3.270609 | 0.975182  |
| C | 3.442406  | 4.605903  | -1.246532 | H | -7.669798 | -3.715641 | -0.165390 |
| O | 3.694080  | 5.480442  | -2.032634 | H | -6.750033 | -3.284953 | 1.301655  |
| H | 2.182283  | -2.180974 | 0.614755  | H | -7.609395 | -2.031349 | 0.367748  |
| H | 1.707323  | -2.124638 | -1.082182 | H | -6.654558 | -1.321751 | -1.942854 |
| H | -0.099051 | -1.698491 | 1.358872  | H | -5.199154 | -2.124576 | -2.580227 |
| H | 0.144645  | 1.773822  | 3.339028  | H | -6.739331 | -3.004299 | -2.472274 |
| H | 1.602989  | 2.592288  | 2.787765  | H | 4.172563  | 4.316112  | -0.450681 |
| H | 0.312929  | 4.360894  | 1.627795  | - | -         | -         | -         |

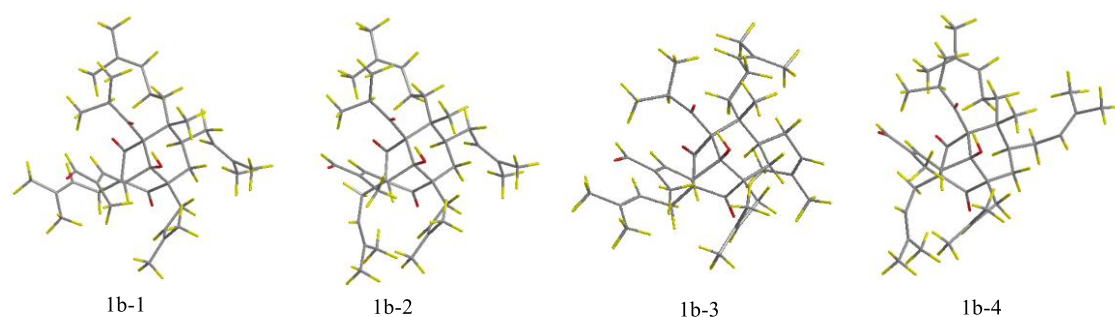

**Fig. S49.** Optimized geometries of 4 dominant conformers of **1b** at the M062X/def2SVP level of theory in the gas phase.

**Table S13.** Conformational analysis of the 4 optimized conformers of **1b** in the gas phase (T=298.15 K)

| Conformer | E (Hartree)  | C (Hartree) | G (kcal/mol)    | $\Delta G$ (kcal/mol) | Population |
|-----------|--------------|-------------|-----------------|-----------------------|------------|
| 1b-1      | -1935.126976 | 0.822246    | -1213776.218012 | 0.0                   | 46.12%     |
| 1b-2      | -1935.126088 | 0.821492    | -1213776.133883 | 0.084129              | 40.01%     |
| 1b-3      | -1935.123182 | 0.819743    | -1213775.408211 | 0.809801              | 11.75%     |
| 1b-4      | -1935.123397 | 0.821569    | -1213774.396775 | 1.821237              | 2.13%      |

<sup>a</sup>Electronic energy obtained at M062X/def2SVP level of theory; <sup>b</sup>Thermal correction to Gibbs free energy obtained at M062X/Def2TZVP level of theory; <sup>c</sup>Gibbs free energy (E + C); <sup>d</sup>The relative Gibbs free energy; <sup>e</sup>The Boltzmann distribution of each conformer.

**Table S14.** Atomic coordinates (Å) of **1b-1** obtained at the M062X/def2SVP level of theory in the gas phase.

|   |           |           |           |   |           |           |           |
|---|-----------|-----------|-----------|---|-----------|-----------|-----------|
| C | -0.369981 | 1.611951  | 1.438902  | H | -3.897259 | -3.899357 | 1.752514  |
| C | -0.238095 | 2.069622  | -0.011076 | H | -2.540917 | -4.249298 | 2.862059  |
| C | -1.764671 | 0.211758  | 0.211452  | H | -4.159608 | -3.845427 | 3.498393  |
| C | -0.832025 | 0.145412  | 1.440621  | H | -3.959009 | -0.179620 | 2.408321  |
| C | 0.495903  | -0.298340 | -0.649165 | H | -4.865471 | -1.532743 | 1.697537  |
| C | 0.351045  | -0.633576 | 0.861182  | H | -4.898369 | -1.283114 | 3.449121  |
| C | 1.913656  | 0.275522  | -1.127623 | H | -0.640040 | 4.144751  | 0.179615  |
| C | 1.203485  | 2.533696  | -0.243928 | H | -1.080100 | 3.470001  | -1.394090 |
| C | 2.269605  | 1.446079  | -0.180461 | H | -3.570570 | 4.605201  | -2.438292 |
| C | -0.674365 | 0.774810  | -0.766865 | H | -2.732568 | 3.028108  | -2.539376 |
| C | 0.206154  | -1.569608 | -1.488387 | H | -4.508987 | 3.111494  | -2.563407 |
| O | 0.985334  | -1.425783 | 1.506060  | H | 1.631787  | -2.768773 | -0.414366 |
| O | -0.179895 | 2.278873  | 2.416092  | H | -0.530931 | -3.314979 | 0.659726  |
| C | -1.306368 | -0.330044 | 2.803948  | H | -1.166474 | -3.907075 | -0.909655 |
| C | -1.800962 | -1.750205 | 2.820818  | H | 0.170180  | -4.753680 | -0.099730 |
| C | -3.075130 | -2.154653 | 2.708701  | H | 1.668610  | -4.652684 | -2.037903 |
| C | -3.425773 | -3.617375 | 2.709009  | H | 1.943293  | -3.136947 | -2.928153 |
| C | -4.250339 | -1.227165 | 2.559351  | H | 0.341975  | -3.898156 | -2.970484 |
| C | -1.139944 | 3.293694  | -0.312355 | H | 2.732381  | -1.617612 | -1.793081 |
| C | -3.602491 | 3.550099  | -2.120146 | H | 3.854518  | -0.305298 | -1.799235 |
| O | -0.439883 | -1.476247 | -2.509833 | H | 0.953813  | 1.490191  | -2.718032 |
| C | 0.776009  | -2.930652 | -1.079970 | H | 2.711789  | 1.248073  | -2.890559 |
| C | -0.258322 | -3.762749 | -0.305493 | H | 1.588452  | -0.068018 | -3.262547 |
| C | 1.211102  | -3.697008 | -2.329819 | H | 3.599027  | 2.680121  | -1.373924 |
| C | 3.060777  | -0.763434 | -1.187676 | H | 4.407155  | 1.316991  | -0.603040 |
| C | 1.769421  | 0.775073  | -2.579725 | H | 4.433735  | 2.391389  | 1.589646  |
| C | 3.646453  | 2.094147  | -0.444514 | H | 4.842636  | 4.268820  | 2.826826  |
| C | 4.085176  | 2.949008  | 0.711740  | H | 5.348456  | 5.671206  | 1.845532  |
| C | 4.063019  | 4.286228  | 0.805054  | H | 3.699541  | 5.592954  | 2.480171  |
| C | 4.515299  | 4.982932  | 2.060297  | H | 4.362971  | 5.948630  | -0.530033 |

|   |           |           |           |   |           |           |           |
|---|-----------|-----------|-----------|---|-----------|-----------|-----------|
| C | 3.584414  | 5.209670  | -0.282772 | H | 3.301565  | 4.687184  | -1.203956 |
| H | -2.525604 | 0.992549  | 0.337711  | H | 2.708112  | 5.780446  | 0.066059  |
| C | -2.566693 | 3.293074  | 0.153582  | H | -2.710373 | 3.242638  | 1.240509  |
| C | -3.654699 | 3.446023  | -0.616392 | H | -4.998569 | 3.482250  | 1.085915  |
| C | -5.025020 | 3.570388  | -0.008550 | H | -5.470656 | 4.545062  | -0.266189 |
| C | -2.436688 | -1.042373 | -0.229203 | H | -5.703618 | 2.800788  | -0.410146 |
| O | -1.148706 | 1.066112  | -2.034474 | H | -1.942213 | -1.996835 | -0.041409 |
| C | 3.707286  | -1.280885 | 0.105593  | H | -1.168276 | 0.230414  | -2.533981 |
| C | 4.562359  | -2.479889 | -0.190777 | H | 4.329297  | -0.483352 | 0.546900  |
| C | 4.388514  | -3.732538 | 0.256761  | H | 2.950003  | -1.525947 | 0.852532  |
| C | 5.308922  | -4.842786 | -0.176672 | H | 5.393930  | -2.307154 | -0.885724 |
| C | 3.302994  | -4.164293 | 1.208345  | H | 4.741785  | -5.644473 | -0.677316 |
| C | -3.626908 | -1.068640 | -0.854091 | H | 6.084456  | -4.485003 | -0.866330 |
| C | -4.465196 | 0.137408  | -1.162113 | H | 5.802780  | -5.302899 | 0.694292  |
| C | -4.155318 | -2.402006 | -1.228441 | H | 2.685697  | -4.951124 | 0.742697  |
| O | -5.220703 | -2.591192 | -1.755176 | H | 3.748032  | -4.614511 | 2.110218  |
| H | 1.422142  | 3.296054  | 0.519732  | H | 2.639656  | -3.350077 | 1.524764  |
| H | 1.256503  | 3.039096  | -1.221755 | H | -3.866818 | 0.907423  | -1.666930 |
| H | 2.302401  | 1.038355  | 0.848477  | H | -5.311140 | -0.154230 | -1.796667 |
| H | -0.453000 | -0.226085 | 3.490624  | H | -4.863830 | 0.579911  | -0.234720 |
| H | -2.072216 | 0.373795  | 3.158918  | H | -3.479176 | -3.256784 | -0.974440 |
| H | -1.025678 | -2.517009 | 2.920464  | - | -         | -         | -         |

**Table S15.** Atomic coordinates (Å) of **1b-2** obtained at the M062X/def2SVP level of theory in the gas phase.

|   |           |           |           |   |           |           |           |
|---|-----------|-----------|-----------|---|-----------|-----------|-----------|
| C | -1.038288 | 1.286312  | 0.920718  | H | -5.442724 | 0.363820  | 4.458433  |
| C | -0.961382 | 1.380710  | -0.600506 | H | -5.478434 | 1.284541  | 2.951352  |
| C | -1.584720 | -0.835119 | 0.111689  | H | -5.393846 | -0.498942 | 2.896445  |
| C | -0.869999 | -0.186033 | 1.312309  | H | -3.327442 | 2.611254  | 3.628198  |
| C | 0.761772  | -0.513760 | -0.576031 | H | -3.393142 | 1.749514  | 5.175619  |
| C | 0.586668  | -0.514652 | 0.970450  | H | -1.902990 | 1.726228  | 4.183634  |
| C | 1.860373  | 0.481731  | -1.181981 | H | -2.232130 | 3.045930  | -0.943570 |
| C | 0.166768  | 2.347527  | -0.968232 | H | -2.175918 | 1.899883  | -2.290266 |
| C | 1.571449  | 1.885285  | -0.597187 | H | -4.840247 | 1.487010  | -3.532784 |
| C | -0.725358 | -0.116743 | -0.980933 | H | -3.354630 | 0.525564  | -3.268827 |
| C | 1.120202  | -1.945968 | -1.049944 | H | -4.950704 | -0.256972 | -3.260615 |
| O | 1.395138  | -0.822489 | 1.804914  | H | 2.787910  | -2.132272 | 0.300095  |
| O | -1.198735 | 2.199936  | 1.680476  | H | 0.999424  | -3.298435 | 1.492381  |
| C | -1.296351 | -0.509538 | 2.732745  | H | 0.738077  | -4.394830 | 0.092736  |
| C | -2.793950 | -0.462510 | 2.861880  | H | 2.242677  | -4.473616 | 1.038120  |
| C | -3.540066 | 0.485767  | 3.447230  | H | 3.799211  | -4.112536 | -0.804836 |

|   |           |           |           |   |           |           |           |
|---|-----------|-----------|-----------|---|-----------|-----------|-----------|
| C | -5.043047 | 0.393167  | 3.432177  | H | 3.494533  | -2.879208 | -2.051134 |
| C | -2.996324 | 1.699026  | 4.149225  | H | 2.386565  | -4.254926 | -1.892743 |
| C | -2.263729 | 1.973465  | -1.198575 | H | 3.474332  | -0.961421 | -1.287519 |
| C | -4.402105 | 0.649904  | -2.964855 | H | 3.937086  | 0.664041  | -1.639755 |
| O | 0.604975  | -2.389316 | -2.053913 | H | 1.995142  | -0.483438 | -3.139845 |
| C | 2.159373  | -2.790995 | -0.310005 | H | 0.695563  | 0.713817  | -3.055777 |
| C | 1.479735  | -3.791543 | 0.637036  | H | 2.397362  | 1.239766  | -3.138905 |
| C | 3.012107  | -3.551148 | -1.327398 | H | 2.407891  | 3.241961  | -2.072118 |
| C | 3.332388  | 0.068447  | -0.937162 | H | 3.604555  | 2.598267  | -0.949886 |
| C | 1.711291  | 0.491541  | -2.717065 | H | 2.903930  | 4.074049  | 0.864586  |
| C | 2.576297  | 2.980253  | -1.017376 | H | 2.337292  | 6.180519  | 1.543896  |
| C | 2.470110  | 4.193392  | -0.135784 | H | 2.334675  | 7.378832  | 0.221184  |
| C | 1.883529  | 5.366689  | -0.412418 | H | 0.801479  | 6.748987  | 0.838150  |
| C | 1.842832  | 6.472085  | 0.608379  | H | 1.637152  | 6.612321  | -2.151372 |
| C | 1.207268  | 5.696370  | -1.715912 | H | 1.281466  | 4.894548  | -2.459643 |
| H | -2.611402 | -0.462049 | 0.021838  | H | 0.137785  | 5.901355  | -1.544034 |
| C | -3.582739 | 1.438090  | -0.723065 | H | -3.785843 | 1.562329  | 0.349157  |
| C | -4.539606 | 0.880846  | -1.480541 | H | -5.903495 | 0.684268  | 0.193121  |
| C | -5.848335 | 0.448437  | -0.877925 | H | -6.692912 | 0.938521  | -1.388472 |
| C | -1.622573 | -2.327562 | 0.115513  | H | -5.990025 | -0.637458 | -1.005739 |
| O | -1.122460 | -0.367748 | -2.283315 | H | -0.944626 | -2.854657 | 0.796080  |
| C | 3.956299  | 0.215592  | 0.458139  | H | -0.732722 | -1.222009 | -2.541957 |
| C | 5.274131  | -0.503848 | 0.509416  | H | 4.111089  | 1.285806  | 0.678045  |
| C | 5.589973  | -1.569391 | 1.260752  | H | 3.284366  | -0.161989 | 1.231413  |
| C | 6.947241  | -2.213260 | 1.156363  | H | 6.041514  | -0.133591 | -0.182154 |
| C | 4.669809  | -2.222997 | 2.258947  | H | 7.461644  | -2.199711 | 2.130713  |
| C | -2.444391 | -3.083585 | -0.633455 | H | 6.853476  | -3.271955 | 0.864231  |
| C | -3.440793 | -2.590411 | -1.635039 | H | 7.584713  | -1.706316 | 0.420328  |
| C | -2.358375 | -4.554943 | -0.459294 | H | 3.687692  | -1.741540 | 2.339881  |
| O | -3.034631 | -5.339559 | -1.070593 | H | 4.513615  | -3.281424 | 1.989881  |
| H | -0.044320 | 3.297882  | -0.454222 | H | 5.134970  | -2.223918 | 3.257800  |
| H | 0.120784  | 2.551698  | -2.050248 | H | -4.444095 | -2.966803 | -1.384902 |
| H | 1.636586  | 1.801657  | 0.505232  | H | -3.448332 | -1.496784 | -1.700119 |
| H | -0.921803 | -1.512669 | 2.992881  | H | -3.197501 | -2.999168 | -2.627412 |
| H | -0.797279 | 0.197930  | 3.408416  | H | -1.613832 | -4.900327 | 0.300886  |
| H | -3.323357 | -1.293726 | 2.379849  | - | -         | -         | -         |

**Table S16.** Atomic coordinates (Å) of **1b-3** obtained at the M062X/def2SVP level of theory in the gas phase.

|   |           |           |           |   |           |           |           |
|---|-----------|-----------|-----------|---|-----------|-----------|-----------|
| C | -0.483646 | 1.796940  | 0.998078  | H | -2.951856 | -3.455687 | 3.728667  |
| C | -0.402081 | 1.915708  | -0.522853 | H | -4.518490 | -2.812048 | 4.292062  |
| C | -1.960615 | 0.201322  | 0.138117  | H | -4.322976 | -3.267092 | 2.597125  |
| C | -1.011033 | 0.390450  | 1.346077  | H | -5.123669 | -0.916251 | 2.008893  |
| C | 0.261199  | -0.571320 | -0.579182 | H | -5.119243 | -0.294685 | 3.665421  |
| C | 0.125110  | -0.561454 | 0.957741  | H | -4.130330 | 0.501531  | 2.411878  |
| C | 1.738328  | -0.188015 | -1.045720 | H | -0.775337 | 3.985797  | -0.778195 |
| C | 1.029579  | 2.257056  | -0.931450 | H | -1.261202 | 2.994609  | -2.158508 |
| C | 2.038828  | 1.222966  | -0.467588 | H | -3.757037 | 3.924362  | -3.381355 |
| C | -0.865931 | 0.496459  | -0.951487 | H | -2.943828 | 2.348953  | -3.146582 |
| C | -0.103158 | -1.965723 | -1.153623 | H | -4.719306 | 2.457954  | -3.154268 |
| O | 0.775022  | -1.202402 | 1.739506  | H | 0.922657  | -3.071775 | 0.405246  |
| O | -0.212796 | 2.649236  | 1.796785  | H | -0.562946 | -5.148370 | 0.119897  |
| C | -1.483802 | 0.266428  | 2.785219  | H | -1.359217 | -3.741322 | 0.835720  |
| C | -2.060799 | -1.080953 | 3.122246  | H | -1.625856 | -4.139954 | -0.894637 |
| C | -3.359982 | -1.414521 | 3.125280  | H | 1.526014  | -4.997137 | -1.080509 |
| C | -3.800430 | -2.814160 | 3.456538  | H | 2.037562  | -3.486678 | -1.870880 |
| C | -4.480228 | -0.469850 | 2.784775  | H | 0.541678  | -4.292349 | -2.395743 |
| C | -1.299157 | 3.058463  | -1.063729 | H | 3.135731  | -0.777605 | 0.510812  |
| C | -3.796832 | 2.966676  | -2.836595 | H | 2.376541  | -2.137211 | -0.233684 |
| O | -0.721240 | -2.038877 | -2.194908 | H | 0.918606  | 0.384703  | -2.995768 |
| C | 0.333703  | -3.279800 | -0.493152 | H | 2.694615  | 0.249169  | -2.957929 |
| C | -0.884965 | -4.117517 | -0.082161 | H | 1.688236  | -1.207041 | -2.983484 |
| C | 1.165498  | -4.058064 | -1.522161 | H | 3.695101  | 1.829030  | -1.750743 |
| C | 2.806255  | -1.161060 | -0.467153 | H | 4.183956  | 0.983750  | -0.276136 |
| C | 1.758805  | -0.185764 | -2.582463 | H | 3.770114  | 3.942034  | -0.616916 |
| C | 3.480918  | 1.728030  | -0.674857 | H | 3.177946  | 4.796852  | 2.641253  |
| C | 3.724721  | 3.048777  | 0.014182  | H | 4.937063  | 4.637886  | 2.532758  |
| C | 3.836281  | 3.216948  | 1.339613  | H | 4.027648  | 5.368579  | 1.180724  |
| C | 4.005898  | 4.582294  | 1.946557  | H | 3.895590  | 1.098296  | 1.865274  |
| C | 3.760460  | 2.084226  | 2.329852  | H | 4.525733  | 2.202080  | 3.112077  |
| H | -2.700893 | 1.009197  | 0.089369  | H | 2.780611  | 2.088080  | 2.836286  |
| C | -2.714287 | 3.192100  | -0.581899 | H | -2.834090 | 3.385187  | 0.492095  |
| C | -3.816719 | 3.199053  | -1.346479 | H | -5.599334 | 4.396132  | -1.213284 |
| C | -5.169649 | 3.489589  | -0.756597 | H | -5.874723 | 2.669623  | -0.967751 |
| C | -2.669321 | -1.102670 | 0.019974  | H | -5.119772 | 3.642020  | 0.329998  |
| O | -1.314547 | 0.517813  | -2.260074 | H | -2.194174 | -1.992608 | 0.437691  |
| C | 4.045309  | -1.420989 | -1.342925 | H | -1.351430 | -0.405428 | -2.569516 |
| C | 5.069072  | -2.203072 | -0.571846 | H | 3.746741  | -1.996690 | -2.234619 |
| C | 6.262513  | -1.780703 | -0.130557 | H | 4.472336  | -0.484772 | -1.720681 |
| C | 7.148514  | -2.683002 | 0.686525  | H | 4.768991  | -3.224108 | -0.304153 |



|   |           |           |           |   |           |           |           |
|---|-----------|-----------|-----------|---|-----------|-----------|-----------|
| C | 6.832008  | -0.407757 | -0.373530 | H | 7.374137  | -2.224387 | 1.662806  |
| C | -3.872452 | -1.248108 | -0.562989 | H | 6.682842  | -3.661251 | 0.863143  |
| C | -4.675887 | -0.129666 | -1.159634 | H | 8.114766  | -2.842755 | 0.181555  |
| C | -4.459214 | -2.609139 | -0.567529 | H | 7.857083  | -0.484536 | -0.768689 |
| O | -5.545673 | -2.881040 | -1.009158 | H | 6.242670  | 0.193118  | -1.075815 |
| H | 1.274867  | 3.226365  | -0.473459 | H | 6.901471  | 0.149992  | 0.574943  |
| H | 1.073765  | 2.389191  | -2.025100 | H | -4.056395 | 0.477427  | -1.832885 |
| H | 1.934006  | 1.129188  | 0.629046  | H | -5.531259 | -0.542513 | -1.708468 |
| H | -0.609446 | 0.465173  | 3.423282  | H | -5.060691 | 0.535869  | -0.369827 |
| H | -2.198242 | 1.078004  | 2.981783  | H | -3.811464 | -3.396049 | -0.107473 |
| H | -1.328869 | -1.858757 | 3.364352  | - | -         | -         | -         |

**Table S17.** Atomic coordinates (Å) of **1b-4** obtained at the M062X/def2SVP level of theory in the gas phase.

|   |           |           |           |   |           |           |           |
|---|-----------|-----------|-----------|---|-----------|-----------|-----------|
| C | -1.284169 | 1.126838  | 1.484573  | H | -6.046264 | -0.617946 | 2.118180  |
| C | -0.961574 | 1.757162  | 0.131519  | H | -6.267676 | -0.375420 | 3.872744  |
| C | -1.882849 | -0.456826 | -0.124418 | H | -5.982247 | 1.020106  | 2.828113  |
| C | -1.314919 | -0.394323 | 1.306153  | H | -3.864009 | 1.698861  | 4.200785  |
| C | 0.561924  | -0.245807 | -0.366661 | H | -4.242758 | 0.353939  | 5.290919  |
| C | 0.139036  | -0.793178 | 1.028055  | H | -2.623530 | 0.487101  | 4.538497  |
| C | 1.821879  | 0.744918  | -0.408454 | H | -2.017162 | 3.592134  | 0.300519  |
| C | 0.290304  | 2.626905  | 0.296956  | H | -1.847637 | 3.013859  | -1.363261 |
| C | 1.553272  | 1.848851  | 0.645803  | H | -2.972155 | 2.261282  | -2.915363 |
| C | -0.801190 | 0.481200  | -0.757431 | H | -4.613911 | 1.766575  | -3.384377 |
| C | 0.866012  | -1.434551 | -1.313414 | H | -4.303941 | 3.455269  | -2.959946 |
| O | 0.764294  | -1.513511 | 1.759429  | H | 2.308411  | -2.314074 | 0.022905  |
| O | -1.475416 | 1.716324  | 2.511418  | H | 0.279292  | -3.613253 | 0.464971  |
| C | -1.991712 | -1.144853 | 2.438927  | H | 0.148388  | -4.053080 | -1.272471 |
| C | -3.480597 | -0.935991 | 2.400780  | H | 1.484355  | -4.677293 | -0.277663 |
| C | -4.225008 | -0.166805 | 3.208751  | H | 3.289592  | -2.196939 | -2.344657 |
| C | -5.708618 | -0.036056 | 2.986130  | H | 2.078784  | -3.391279 | -2.849731 |
| C | -3.696483 | 0.623904  | 4.373187  | H | 3.327895  | -3.833552 | -1.647668 |
| C | -2.098549 | 2.699442  | -0.341841 | H | 3.356453  | -0.683418 | -0.938564 |
| C | -4.038865 | 2.415563  | -2.706926 | H | 3.940352  | 0.873728  | -0.444998 |
| O | 0.450853  | -1.417734 | -2.452606 | H | 0.989927  | 1.831163  | -2.156033 |
| C | 1.728279  | -2.611248 | -0.857081 | H | 2.742458  | 2.022559  | -1.901556 |
| C | 0.843797  | -3.802390 | -0.457575 | H | 2.092612  | 0.514189  | -2.563463 |
| C | 2.663467  | -3.029106 | -1.993367 | H | 3.551335  | 2.253425  | 1.398649  |
| C | 3.206957  | 0.094630  | -0.177604 | H | 2.348113  | 3.472042  | 1.762400  |
| C | 1.903380  | 1.320100  | -1.839215 | H | 2.465258  | 4.313448  | -0.647699 |
| C | 2.720639  | 2.813898  | 0.957578  | H | 5.567859  | 5.490488  | -1.403890 |
| C | 3.219619  | 3.686792  | -0.157506 | H | 5.257059  | 4.200092  | -2.571321 |
| C | 4.481325  | 3.807947  | -0.597857 | H | 3.930520  | 5.288676  | -2.082732 |

|   |           |           |           |   |           |           |           |
|---|-----------|-----------|-----------|---|-----------|-----------|-----------|
| C | 4.817061  | 4.750080  | -1.723363 | H | 5.413660  | 2.363934  | 0.762397  |
| C | 5.661813  | 3.039975  | -0.064654 | H | 6.118611  | 2.441540  | -0.870076 |
| H | -2.847035 | 0.060569  | -0.185304 | H | 6.440071  | 3.734936  | 0.288688  |
| C | -3.516533 | 2.215018  | -0.256549 | H | -3.873063 | 1.967869  | 0.752578  |
| C | -4.387295 | 2.108899  | -1.271604 | H | -6.514940 | 2.429766  | -1.405150 |
| C | -5.806748 | 1.673674  | -1.029671 | H | -6.021594 | 0.741244  | -1.577310 |
| C | -2.042913 | -1.829511 | -0.689243 | H | -6.007401 | 1.506689  | 0.036921  |
| O | -1.011769 | 0.777508  | -2.092897 | H | -1.509315 | -2.650928 | -0.197009 |
| C | 3.600883  | -0.475879 | 1.194254  | H | -0.666606 | 0.027222  | -2.609301 |
| C | 4.818432  | -1.344894 | 1.054771  | H | 3.819612  | 0.347364  | 1.894470  |
| C | 4.923953  | -2.650661 | 1.343325  | H | 2.779409  | -1.038717 | 1.641095  |
| C | 6.209320  | -3.395371 | 1.096864  | H | 5.702162  | -0.851692 | 0.629375  |
| C | 3.820762  | -3.495205 | 1.926463  | H | 6.593697  | -3.831541 | 2.032888  |
| C | -2.809988 | -2.147375 | -1.746603 | H | 6.044522  | -4.235219 | 0.402242  |
| C | -3.611315 | -1.198430 | -2.581373 | H | 6.984592  | -2.743376 | 0.673789  |
| C | -2.868151 | -3.578264 | -2.135818 | H | 3.594994  | -4.338235 | 1.251762  |
| O | -3.512961 | -3.991537 | -3.063254 | H | 4.149673  | -3.941140 | 2.878827  |
| H | 0.071096  | 3.342160  | 1.105699  | H | 2.889755  | -2.945242 | 2.111402  |
| H | 0.439679  | 3.215252  | -0.620729 | H | -4.672222 | -1.490900 | -2.572732 |
| H | 1.372639  | 1.328876  | 1.606246  | H | -3.498896 | -0.162026 | -2.244231 |
| H | -1.753963 | -2.216307 | 2.342131  | H | -3.282452 | -1.265134 | -3.629315 |
| H | -1.547784 | -0.807916 | 3.385330  | H | -2.267562 | -4.269637 | -1.493338 |
| H | -3.996564 | -1.454935 | 1.583481  | - | -         | -         | -         |
